# Supplementary material for: Systematic review and meta-analysis of diabetes mellitus, cardiovascular and respiratory condition epidemiology in sexual minority women
Source: PubMed Central journal article supplement — BMJ Open. 2018 Apr 17;8(4):e020776. doi: 10.1136/bmjopen-2017-020776 (PMC5905763; doi:10.1136/bmjopen-2017-020776), 2018-04-17
Supplement: bmjopen-2017-020776.draft_revisions.pdf [file bmjopen-2017-020776.draft_revisions.pdf]

# BMJ Open

BMJ Open is committed to open peer review. As part of this commitment we make the peer review history of every article we publish publicly available.

When an article is published we post the peer reviewers' comments and the authors' responses online. We also post the versions of the paper that were used during peer review. These are the versions that the peer review comments apply to.

The versions of the paper that follow are the versions that were submitted during the peer review process. They are not the versions of record or the final published versions. They should not be cited or distributed as the published version of this manuscript.

BMJ Open is an open access journal and the full, final, typeset and author-corrected version of record of the manuscript is available on our site with no access controls, subscription charges or pay-per-view fees (<http://bmjopen.bmj.com>).

If you have any questions on BMJ Open's open peer review process please email [info.bmjopen@bmj.com](mailto:info.bmjopen@bmj.com)

# BMJ Open

## **A systematic review and meta-analysis of diabetes mellitus, cardiovascular and respiratory condition epidemiology in sexual minority women.**

|                               |                                                                                                                                                                                                                                                                                                                                                   |
|-------------------------------|---------------------------------------------------------------------------------------------------------------------------------------------------------------------------------------------------------------------------------------------------------------------------------------------------------------------------------------------------|
| Journal:                      | <i>BMJ Open</i>                                                                                                                                                                                                                                                                                                                                   |
| Manuscript ID                 | bmjopen-2017-020776                                                                                                                                                                                                                                                                                                                               |
| Article Type:                 | Research                                                                                                                                                                                                                                                                                                                                          |
| Date Submitted by the Author: | 22-Nov-2017                                                                                                                                                                                                                                                                                                                                       |
| Complete List of Authors:     | Meads, Catherine; Anglia Ruskin University, Faculty of Health, Social Care and Education<br>Martin, Adam; Academic Unit of Health Economics, Leeds Institute of Health Sciences<br>Grierson, Jeffrey; Anglia Ruskin University, Faculty of Health, Social Care and Education<br>Varney, Justin; Public Health England, Adult Health and Wellbeing |
| Keywords:                     | systematic review, meta-analysis, sexual minority women, Cardiac Epidemiology < CARDIOLOGY, Epidemiology < THORACIC MEDICINE                                                                                                                                                                                                                      |
|                               |                                                                                                                                                                                                                                                                                                                                                   |

SCHOLARONE™  
Manuscripts

Peer Review Only

1  
2  
3 Title: A systematic review and meta-analysis of diabetes mellitus, cardiovascular and respiratory  
4 condition epidemiology in sexual minority women.  
5

6  
7 Authors: Catherine Meads<sup>1</sup>, Adam Martin<sup>2</sup>, Jeffrey Grierson<sup>1</sup>, Justin Varney<sup>3</sup>  
8

9 Corresponding author: C Meads – email: catherine.meads@anglia.ac.uk  
10

11 1. Faculty of Health, Social Care and Education, Anglia Ruskin University, Cambridge, UK  
12

13 2. Academic Unit of Health Economics, Leeds Institute of Health Sciences, University of Leeds, Leeds,  
14 UK  
15

16 3. Public Health England  
17  
18

19 Acknowledgements: Professor Richard Riley for advice on conducting meta-analyses of adjusted  
20 odds ratios, Dr Brendon Stubbs for conducting the meta-analyses of adjusted odds ratios.  
21  
22

23 Conflicts of interest: none  
24

25 Funding: Public Health England grant (£30,000) to RAND Europe for writing the full WSW best  
26 evidence review. The funder did not influence the conduct of the review.  
27

28 Word count: 3927  
29

30 Data sharing statement: No additional unpublished data as systematic review  
31

32 Contributorship statement: Justin Varney and Catherine Meads developed the research question.  
33 Catherine Meads and Adam Martin conducted the systematic review (searches, citation selection,  
34 data extraction, quality assessment). Catherine Meads wrote the systematic review and all data was  
35 checked by Adam Martin and Jeffrey Grierson. Catherine Meads conducted the meta-analysis,  
36 checked by Adam Martin. All authors edited the manuscript.  
37  
38  
39  
40  
41  
42  
43  
44  
45  
46  
47  
48  
49  
50  
51  
52  
53  
54  
55  
56  
57  
58  
59  
60

## Abstract

### Objectives

Sexual minority women (SMW) experience higher chronic-disease risk-factors than heterosexual counterparts. However, it was unclear if these risks translate into higher physical-condition rates. This systematic review evaluates cardiovascular disease (CVD), hypertension, respiratory disease and diabetes mellitus in SMW.

### Methods

Prospero database registration: CRD42016050299. Included were studies reporting mortality, incidence or prevalence of the above listed conditions in SMW compared to heterosexual women. Databases (platforms) searched from 2010 to December 2016 were Medline (OVID), Embase (Elsevier), Cinahl (Elsevier), PsycInfo (Ovid), Social Policy and Practice (Ovid), Cochrane CENTRAL (Cochrane Library), Science Citation Index (Web of Science), CAB abstracts (Ovid). Search terms included MeSH terms and text words. Extensive additional searches were conducted in specialist academic journals and websites.

Two reviewers checked study eligibility. One independently extracted data and assessed quality, checked by a second, with disagreements resolved through discussion. The CASP cohort checklist was used to assess risk-of-bias. Meta-analysis was conducted where more than four studies reported same outcomes, with Comprehensive Meta-analysis software using adjusted odds ratios (AORs) and random-effects models. Heterogeneity was assessed using  $I^2$  test.

### Results

Identified were 23,103 citations, 692 full-texts screened, and 16 studies included (in 18 papers). One reported mortality (from Denmark), none incidence and 15 prevalence (14 USA, 1 Australia). Same-sex-cohabiting women had higher mortality rates compared to opposite-sex-cohabiting women in CVD (Hazard Ratio (HR)=1.37 (95%CI=1.22-1.54) and respiratory disease (HR=2.10 (95%CI=1.74-2.53). AOR meta-analyses of seven studies showed higher asthma rates in lesbians (OR=1.44 (95%CI=1.27-1.64) $I^2=0%$ ) and bisexual women (OR=1.64 (95%CI=1.41-1.89) $I^2=0%$ ) but no differences for CVD (five studies), hypertension (five studies) or diabetes mellitus (seven studies).

### Conclusions

These new health inequalities estimates require further confirmatory epidemiological studies, and investigation into potential environmental, hormonal, physiological, psychological or genetic causes. This would be supported by routine collection of sexual-identity measures in population-level epidemiological surveys.

### Strengths and limitations of this study

- A major strength is that this is the first numerical estimate of the relative prevalence of diabetes mellitus, cardiovascular and respiratory diseases in lesbians and bisexual women.
- We used extensive searches from a number of different sources, not just electronic databases and reference lists but also in specialist academic journals and websites to ensure we found all relevant studies.
- We used a wide definition of SMW to include identity, behaviour and partnership to be able to include all SMW irrespective of being sexually active or in a partnership. This will widen the generalizability of the systematic review.
- Considerable efforts were made to avoid double counting of participants from different studies when entering data but some double-counting may have occurred due to the nature of the surveys used in the studies.
- We used adjusted odds ratios to meta-analyse, which means that the results were more comparable than using unadjusted prevalence estimates. However, none of the AORs were adjusted for smoking status, which is a limitation of the included studies.

## Background

Sexual minority women (SMW) include lesbians, bisexual women, women who have sex with women, women who have sex with men and women, and women who are married to or cohabit with another woman in a committed relationship. Public Health England estimates that at least 2.5% of the population identify as lesbian, gay or bisexual<sup>1</sup>.

In general, SMW populations experience disproportionate behavioural risks to health and higher chronic disease risk factors than their heterosexual counterparts<sup>2,3</sup>. Chronic disease risk factors include poor diet, lack of exercise, obesity, smoking, excessive alcohol intake, anxiety, depression, hypertension and high cholesterol levels. Due to a lack of research so far<sup>3</sup>, it is unclear whether these risk factors translate into higher rates of physical health conditions.

Past research has highlighted some aspects of health inequalities experienced by SMW but also identified significant and persistent gaps in the evidence<sup>2,4-7</sup> including in relation to common physical conditions such as cardiovascular disease (CVD), respiratory tract disease and diabetes mellitus. These are some of the leading causes of death and disability for women<sup>8</sup> and, up to now, there have been no published summary estimates of the relative prevalence of these conditions in SMW compared to heterosexual women.

There have been two recent systematic reviews of physical health in SMW<sup>9,10</sup>. Eliason (2015)<sup>9</sup> reviewed evidence on prevalence and risk of a variety of conditions and Simoni et al (2016)<sup>10</sup> investigated disparities in physical health conditions in SMW. Since these systematic reviews were conducted, more prevalence studies have been published. This systematic review includes all relevant recent evidence (published from 2010 onwards) on the mortality, incidence and prevalence of specific physical health conditions of CVD, hypertension, respiratory disease and diabetes mellitus in SMW compared to heterosexual women, and conducts meta-analyses in order to derive up-to-date prevalence estimates of these conditions and determine whether there are different rates in SMW compared to heterosexual women.

## Methods

A protocol was registered with the Prospero database (No. CRD42016050299) for research investigating all aspects of health and experience of healthcare in SMW, of which this project is part. The inclusion criteria for this systematic review were any published comparative studies in any language, published from 2010 onwards, comparing specific rates (see below) in SMW (any definition including identity, behaviour or cohabitation status) of any age compared to heterosexual women (any definition including identity, behaviour or cohabitation status) of any age in any country or setting. The following self-report or objectively measured rates were included: mortality, incidence and prevalence of CVD, hypertension, diabetes mellitus (any type) and respiratory diseases including asthma. .

### Searches:

Database searches were conducted in two phases. First, searches were conducted by Public Health England Knowledge and Library Service in May 2015. Second, searches were conducted by the first author (CM) in December 2016 with dates from January 2015 to December 2016. Databases (platforms) searched were Medline (OVID), Embase (Elsevier), Cinahl ((Elsevier), PsycINFO (Ovid), Social Policy and Practice (Ovid), Cochrane CENTRAL (Cochrane Library), Science Citation Index (Web of Science), CAB abstracts (Ovid). EPPI-Reviewer 4, Endnote and Microsoft Excel were used to sift

1  
2  
3 citations. Search terms included MeSH terms and text words for sexual minority (for example,  
4 lesbian, bisexual, homosexual, WSW, WSMW, same sex) and for the physical conditions. Searches  
5 were not limited to English language. Example search strategies for 4 databases from the December  
6 2016 searches are in Web Supplement 1.  
7

8 In addition to database searches, reviews and summaries of lesbian, gay, bisexual & transgender  
9 (LGB&T) health were examined for relevant evidence. LGB&T Health Research Journal (all issues),  
10 Journal of Lesbian Studies (2014-16) and Journal of Gay and Lesbian Mental Health (2014-16) were  
11 searched. Previous projects by the first author (CM) were searched for relevant evidence and, from a  
12 previous project, a list of currently active researchers in LGBT health with their publications were  
13 reviewed. Web pages of several researchers known to be active in SMW research were searched.  
14 The UK National LGB&T Partnership monthly newsletter from February to October 2016 was sifted  
15 for relevant up-to-date work that had not yet been published. UK national survey websites were also  
16 sifted for information on sexual identity and health (Integrated Household Survey, Scottish Health  
17 Survey, Welsh Health Survey and Health Survey for England).  
18  
19

## 20 21 Study selection, data extraction, quality assessment and synthesis

22  
23 Full text copies of references matching inclusion criteria were obtained. Two reviewers (CM and AM)  
24 checked study eligibility. One independently extracted data from studies into the report (CM) and  
25 these were checked by another reviewer (JG), with disagreements resolved through discussion.  
26 Characteristics and results of all included studies were described through narrative synthesis.  
27 Tabulation was used where there was more than one study reporting the same outcome. Where  
28 there was overlap in study populations, the largest included population was used where outcomes  
29 of interest were reported. The Critical Appraisal Skills Programme (CASP) checklist for cohort studies  
30 was used to assess quality for all studies. Since there is no established and validated quality checklist  
31 specifically for cross-sectional surveys, using the same checklist for all provided consistency in  
32 quality assessment across studies. Meta-analysis was conducted where there were four or more  
33 discrete studies reporting the same outcome. This included both unadjusted prevalence estimates  
34 (with Review Manager software 5.3), and adjusted odds ratios using inverse variance (with  
35 Comprehensive Meta-analysis version 3). Random effects models were used for both. Statistical  
36 heterogeneity was assessed using the  $I^2$  test, using standard thresholds for high, medium and low  
37 heterogeneity<sup>11</sup>. There were insufficient studies reporting the same outcomes to be able to  
38 construct a meaningful funnel plot to assess publication bias.  
39  
40  
41

## 42 Results

### 43 Description of studies

44 A total of 23,103 citations were identified, 22,763 from the first searches and 340 from the second  
45 searches. Full texts of 692 papers were screened for potential relevancy. Sixteen studies were  
46 included<sup>12-27</sup>, described in 18 papers - the study by Clark et al (2015)<sup>28</sup> contained a subset of the  
47 participants in the study by Everett et al (2013)<sup>17</sup> and the study by Wallace (2011)<sup>29</sup> contained a  
48 subset of those in the study by Boehmer et al (2014)<sup>14</sup>. For characteristics of included studies, see  
49 Table 1 and for participant baseline characteristics, see Web Appendix Table 1.  
50  
51

52 One study examined mortality rates; Frisch and Simonsen (2013)<sup>21</sup> reported hazard ratios for  
53 mortality by sexual orientation in a large national cohort from Denmark by various causes of death  
54 (n=6.5 million, approximately 50% women).  
55  
56  
57

1  
2  
3 No studies investigated incidence, and 15 studies investigated prevalence<sup>10-20, 22-27</sup>. Two were based  
4 on single waves of cohort studies (Everett et al 2013<sup>17</sup> (also reported in Clarke et al 2015<sup>28</sup>), and  
5 McNair et al 2011<sup>26</sup>). The first<sup>17</sup> was based in the USA and used Wave IV of data from the National  
6 Longitudinal Study of Adolescent Health. The second<sup>26</sup> used one year's data from an Australian study  
7 of young women aged 18-23 selected at random from the Australian Medicare database. The  
8 remaining 13 studies were from the USA and used one or more year's data from repeated cross  
9 sectional surveys. Eight of these used Behavioral Risk Factor Surveillance System (BRFSS) surveys,  
10 either using a national sample from different years<sup>12,13</sup> or for specific states (Massachusetts<sup>15</sup>,  
11 Oregon<sup>22</sup>, North Carolina<sup>25</sup>, Washington State<sup>16,19,20</sup>). Other surveys used included; The National  
12 Health Interview Survey<sup>23,27</sup>, The California Health Interview Survey<sup>14,29</sup>, The Youth Risk Behaviour  
13 Surveillance System<sup>24</sup>, The National Health and Nutrition Examination Survey<sup>18</sup>.

14  
15  
16 One group of studies<sup>16,19,20</sup> reported different outcomes for different subsets (such as age ranges) of  
17 the same repeated survey for different years. Ward et al (2015)<sup>27</sup> investigated a subset of the  
18 population in Jackson et al (2016)<sup>23</sup> but Ward et al (2015)<sup>27</sup> reported asthma whereas Jackson et al  
19 (2016)<sup>23</sup> did not so both papers for this study have been included. Wallace et al (2011)<sup>29</sup> used a  
20 subset of the sample in Boehmer et al (2014)<sup>14</sup> and reported the same outcomes so these results are  
21 not reported here. Everett et al (2013)<sup>17</sup> and Clark et al (2015)<sup>28</sup> reported different outcomes from  
22 the same population so both papers for this study have been included.

23  
24 Quality assessment found similar quality issues across studies, and are reported in Web Appendix  
25 Table 2. The cohort studies<sup>17,26</sup> reported results as if they were cross-sectional surveys by not using  
26 follow-up data. The main quality issues were that health conditions were ascertained mostly by  
27 health self-report; the main exception was in Everett et al 2013 (and Clark et al 2015)<sup>17,28</sup> where  
28 interviewers measured blood pressure. Also, weighted prevalence percentages were reported in  
29 several included studies (see Web Appendix Table 1), but weighting factors used were often unclear.

### 30 31 32 Main findings

33 For CVD mortality and for respiratory tract disease mortality, Frisch and Simonsen (2013)<sup>21</sup> found  
34 that same-sex cohabiting women had higher mortality rates to opposite sex cohabiting women for  
35 these diseases (HR 1.37 (95%CI 1.22 to 1.54) and HR 2.10 (95%CI 1.74 to 2.53) respectively) but that  
36 same-sex married women had similar mortality rates to opposite sex married women (HR 1.32  
37 (95%CI 0.75 to 2.33) and HR 0.85 (95%CI 0.36 to 2.05) respectively). The sample sizes were larger for  
38 same-sex cohabiting women (n=207 and n=111) than same sex married women (n=12 and n=5) and  
39 no conclusions can be drawn from the same sex married women data as sample sizes were too  
40 small.  
41  
42  
43  
44

45 Numerical prevalence results are presented in Table 2 (asthma), Web Appendix Table 3 (CVD), Web  
46 Appendix Table 4 (hypertension), and Web Appendix Table 5 (diabetes mellitus). One study<sup>23</sup>  
47 presented results for heart disease and stroke separately and found no difference in rates between  
48 any of the groups (see Web Appendix Table 3). One study<sup>27</sup> presented results for chronic obstructive  
49 pulmonary disease which found higher rates in bisexual women compared to heterosexual women  
50 but not for lesbians (prevalence in lesbians 6.0% (95%CI 3.2 to 11.0), bisexual women 13.6% (95%CI  
51 6.9 to 25.2), heterosexual women 6.4% (95%CI 5.9 to 6.8).  
52

### 53 54 Meta analysis

55 There were sufficient studies (i.e. n>4) presenting results for CVD, hypertension, asthma and  
56 diabetes (any type) in lesbians and in bisexual women for meta-analyses to be conducted.  
57



Meta-analyses of unadjusted prevalence (see figures 1a and 1b, Web Appendix 2a, 2b, 3a, 3b, 4a, 4b) showed no difference in CVD (lesbian OR=0.94 (95%CI 0.73 to 1.21) and bisexual women OR=0.90 (95%CI 0.54 to 1.51)) but lower prevalence of hypertension (lesbian OR=0.82 (95%CI 0.72 to 0.94) and bisexual women OR=0.64 (95%CI 0.49 to 0.85)). There was higher prevalence of asthma (lesbians OR=1.47 (95%CI 1.32 to 1.63) and bisexual women OR=1.97 (95%CI 1.71 to 2.26)). For diabetes mellitus there was no difference in prevalence between lesbians and heterosexual women but lower prevalence in bisexual women (OR=0.86 (95%CI 0.65 to 1.12) and OR=0.70 (95%CI 0.54 to 0.91)).

Meta-analyses of adjusted odds ratios showed increased rates of asthma in lesbians and in bisexual women compared to heterosexual women (ORs = 1.44 (95%CI 1.27 to 1.64)  $I^2=0\%$  and 1.64 (95%CI 1.41 to 1.89)  $I^2=0\%$ ). They showed no differences for lesbians or bisexual women compared to heterosexual women for CVD (ORs = 1.34 (95%CI 0.97 to 1.85)  $I^2=45\%$  and 1.08 (95%CI 0.80 to 1.47)  $I^2=0\%$ ), for hypertension (ORs = 0.98 (95%CI 0.86 to 1.14)  $I^2=0\%$  and 1.08 (95%CI 0.86 to 1.35)  $I^2=39\%$ ), and for diabetes mellitus (ORs = 1.11 (95%CI 0.91 to 1.36)  $I^2=0\%$  and 1.01 (95%CI 0.75 to 1.36)  $I^2=51\%$ ).

## Discussion

### Summary of main findings

Results from a single large study reporting mortality rates<sup>21</sup> showed that there was no difference in cardiovascular or respiratory tract disease mortality rates in same-sex married compared to opposite sex married women, but higher mortality rates in same-sex cohabiting women compared to opposite sex cohabiting women.

Meta-analyses of adjusted odds ratios of disease prevalence showed no differences in CVD, hypertension or diabetes mellitus prevalence, but a higher prevalence of asthma in SMW compared to heterosexual women.

### Discussion of main findings

A key finding was the higher prevalence, from the adjusted odds ratio meta-analysis, of asthma in lesbians and bisexual women. Asthma is caused by a mixture of genetic and environmental factors. Higher rates are associated with anxiety but it is not known if asthma causes psychological problems or if psychological problems lead to asthma<sup>30</sup>. Nevertheless, studies have shown higher rates of mental health problems including anxiety in SMW<sup>31,32</sup>. Asthma is also more common amongst those who are economically disadvantaged, and a consistent finding in studies included in the systematic review was that SMW had below average incomes<sup>12,13,14,18,26</sup>. Asthma is also more common amongst current or former smokers. Several included studies showed higher rates of smoking or tobacco use amongst SMW<sup>12,13,16-18,20,22,23,25</sup>. However, only one of the studies reporting asthma prevalence clearly controlled for smoking behaviour<sup>12</sup>.

The finding of lower hypertension prevalence and no difference in the adjusted odds ratio meta-analysis in lesbians and bisexual women was unexpected. Higher rates of hypertension are associated with lack of exercise and obesity. Several of the included studies demonstrated higher rates of obesity<sup>12-15,17-19,22,23</sup> and a recent systematic review on obesity in SMW<sup>33</sup> also found consistently higher rates of obesity amongst SMW compared to heterosexual women. However, the rates of physical exercise in SMW is less clear. Two of the included studies showed higher rates of physical activity or exercise in lesbians and bisexual women compared to heterosexual women<sup>13,25</sup> whilst four showed no differences<sup>17,19,22,23</sup>. Hypertension is also associated with mental health difficulties, particularly depression<sup>34</sup>, and there are higher rates of depression in SMW<sup>31,32</sup>.

1  
2  
3 No difference in rates of diabetes mellitus were found in the meta-analysis of adjusted odds ratios,  
4 but in the unadjusted prevalence meta-analysis higher rates were found in bisexual women but not  
5 lesbians. It is unclear as to why this would occur. Risk factors for type II diabetes mellitus include  
6 hypertension, overweight/obesity, physical inactivity and unhealthy diet. Evidence on the first three  
7 are discussed above, however there is much less information available about diet. Dilley et al 2010<sup>16</sup>  
8 reported that the proportion eating insufficient fruits and vegetables was higher in bisexual women  
9 than lesbians and heterosexual women but Garland-Forshee et al 2014<sup>22</sup> showed no differences  
10 between lesbians, bisexual and heterosexual women in the proportion who met US CDC  
11 recommendations on fruit and vegetable intake.  
12

13  
14 Three of the included studies calculated that lesbians and bisexual women were at higher risk of  
15 CVD<sup>15,18,28</sup>. Farmer et al (2013)<sup>18</sup> and Clark et al (2015)<sup>28</sup> calculated risk scores using the Framingham  
16 General CVD Risk Score and both calculated that SMW had higher CVD risk scores. Farmer et al  
17 (2013)<sup>18</sup> calculated that SMW were 13.9% (95%CI 8.55 to 19.3%) older in vascular terms than their  
18 chronological age, and that this was 5.7% (95%CI 1.5% to 9.8%) greater than heterosexual women.  
19 Clark et al (2015)<sup>28</sup> found that average 30 year CVD risk was raised in all sexual minority groups of  
20 women, significantly so in mostly heterosexual and mostly homosexual women. Conron et al  
21 (2010)<sup>15</sup> also calculated CVD risk, using presence of obesity and smoking plus one other risk factor  
22 including lack of moderate physical activity, lifetime diabetes mellitus, hypertension and high  
23 cholesterol. They estimated that lesbians and bisexual women were at higher risk of CVD than  
24 heterosexual women.  
25

26  
27 It is known that there are higher rates of several CVD risk factors in SMW, including  
28 overweight/obesity, diabetes mellitus, tobacco use (all discussed above) high cholesterol and  
29 harmful use of alcohol (discussed below). Hence the finding of no difference in CVD rates was  
30 surprising. Also, since the systematic review found higher rates of asthma, if this was due to higher  
31 rates of smoking, it would be expected that there would be correspondingly higher rates of CVD.  
32

33  
34 Several of the included studies reported higher rates of harmful alcohol use in lesbians and bisexual  
35 women compared to heterosexuals<sup>13,16-18,20,22,23</sup>. Several also reported cholesterol levels - one found  
36 lower cholesterol levels in lesbians and bisexual women<sup>17</sup> but most found no significant  
37 differences<sup>16,20,22</sup>. Matthews et al, 2014<sup>25</sup> found that twice as many lesbians and bisexual women  
38 than heterosexual women were not having their cholesterol checked (32.5% vs 13.8%), but the  
39 implications of this are unclear.  
40

#### 41 **Strengths and weaknesses of the study**

42  
43 The strengths of the current systematic review include extensive searches from a number of  
44 different sources. We used a wide definition of SMW to include identity, behaviour and partnership.  
45 It is acknowledged that these are different concepts and women can identify as lesbian or bisexual  
46 without being sexually active or being in a partnership. Also some women identify as lesbian whilst  
47 having sex with men and some women identify as heterosexual whilst having sex with women. Most  
48 of the studies also used self-report for the physical conditions, and this may result in responder bias,  
49 but it is unclear why responder bias might be stronger in SMW than heterosexual respondents. Also,  
50 almost all of the included studies were conducted in USA, so results may not be generalizable to  
51 other countries. Also, it is known that SMW have less insurance coverage and poorer access to  
52 healthcare in USA<sup>35</sup>. The precise questions on health used in the BRFSS questionnaires asked  
53 whether the respondent had been 'told by a health care professional' that they had had the named  
54 condition. If SMW have less access to healthcare, it could be assumed that fewer would have been  
55 told they had one of the conditions investigated here. So it is possible that all of the rates may have  
56  
57

1  
2  
3 been underestimated, and the increased rates of asthma may be even higher than found here. In the  
4 reported results, prevalence of physical conditions were weighted to better reflect the underlying  
5 population in some of the included studies but not in others. Where the sexual minority samples  
6 were younger than the heterosexual population with which they were compared, it might be  
7 expected that the lack of weighting by age would result in underestimation of the difference in  
8 prevalence of physical health conditions, particularly CVD, hypertension and diabetes mellitus where  
9 prevalence rises by age. There were insufficient studies to be able to conduct meaningful subgroup  
10 analyses by whether or not the study had controlled for age. Furthermore, two of the studies<sup>13,20</sup>  
11 were unclear as to whether they weighted the reported prevalence or whether the reported  
12 weighting factors referred to the adjusted odds ratios that they also report. Some of the studies  
13 weighted by factors such as education and income which may also impact on the estimated  
14 prevalence of physical conditions. Some important factors were often not controlled for, e.g. for  
15 asthma, it would be usual to include smoking rates, which differ between SMW and heterosexual  
16 female populations. A further major limitation is that almost all of the prevalence research was from  
17 USA so it currently unclear if the findings are generalizable to other countries.  
18  
19

20  
21 In the meta-analyses, considerable efforts were made to avoid double counting of participants from  
22 different studies when entering data and hence some studies were excluded for one or more  
23 reported outcomes<sup>16,20,28,29</sup>. Random effects models were used because of clinical heterogeneity of  
24 the study samples. The heterogeneity between studies in the weightings that were used for the  
25 prevalence estimates in the unadjusted meta-analyses may have introduced some bias from this loss  
26 of information about differences between the two groups. Hence there may be some inconsistency  
27 between the AORs reported in the results tables and the ORs used in the meta-analysis. The meta-  
28 analyses of AORs mitigates some of these effects. However, in both types of meta-analyses, there  
29 was heterogeneity in outcome measures (e.g. one study measured hypertension, six using self-  
30 report hypertension and one study using hypertensive medication use), although we do not expect  
31 that this impacted on the observed differences between groups, our main outcome of interest.  
32  
33

### 34 **Strengths and weaknesses in relation to previous research**

35  
36 The previous systematic reviews<sup>9,10</sup> found fewer studies and did not conduct meta-analyses so did  
37 not quantify the physical health disparities they had found. For CVD prevalence Eliason (2014)<sup>9</sup>  
38 included seven studies, of which four were published before 2010, and for hypertension it included  
39 12 studies, of which four were published before 2010. For asthma it included 13 studies, four of  
40 which were published before 2010. Some relevant results from included studies were not described,  
41 and the study by Garland-Forshee et al 2014<sup>21</sup> was omitted. Eliason (2014)<sup>9</sup> concluded that asthma  
42 was more common in SMW, but no differences were consistently found in the other chronic physical  
43 conditions she investigated, including diabetes, hypertension and CVD. Simoni et al (2016)<sup>10</sup> had a  
44 very brief summary of results. For CVD it found one study, for hypertension one study and for  
45 asthma four studies. All of these were included in the systematic review by Eliason (2015)<sup>9</sup>. Simoni et  
46 al (2016)<sup>10</sup> found evidence of disparities in the one included study reporting CVD<sup>19</sup> and in asthma,  
47 but that evidence was lacking in diabetes and hypertension. There is also little information on the  
48 prevalence of these conditions in men according to sexual orientation and no relevant systematic  
49 reviews<sup>7</sup>.  
50  
51

### 52 **Implications for clinicians and policy-makers**

53  
54 If there are higher rates of asthma in lesbians and bisexual women, this might have implications for  
55 health service delivery, particularly in primary care. Urwin and Whittaker (2016)<sup>36</sup> published an  
56 evaluation of the English General Practice Patient Survey (n=2,807,320 in total, 1,556,909 women)  
57  
58  
59  
60

1  
2  
3 looking at inequalities of GP use by sexual orientation for various conditions. They found that  
4 lesbians but not bisexual women were less likely to visit the GP than heterosexual women in the  
5 previous 3 months for asthma or long-term chest problem (adjusted OR=0.84 (95%CI 0.71 to 0.98  
6 and OR=0.85 (95%CI 0.69 to 1.04)). So it is likely that SMW, particularly in the UK and possibly  
7 elsewhere, are not accessing services despite ill-health. A recent systematic review found that sexual  
8 minority populations generally have difficulties with access to health services for a variety of reasons  
9 including communication difficulties, internalised homophobia, prejudicial conduct adopted by  
10 health professionals, breach of confidentiality during consultations and institutional homophobia<sup>37</sup>.  
11 Combined with the evidence shown in this systematic review, this suggests potentially considerable  
12 latent demand for primary care services amongst SMW and that there may be particular issues for  
13 lesbians accessing primary health care services for asthma. This evidence contributes to a bigger  
14 picture about inequality for SMW in a wide range of aspects<sup>2,5</sup>.  
15  
16

17 This systematic review highlights the need for better routine data collection on sexual minority  
18 women as much of the current research has small sample sizes and based on countries with  
19 significantly different healthcare access and social norms around sexual identity. The introduction of  
20 an NHS information standard on sexual orientation in April 2017<sup>38</sup> will start to introduce routine  
21 data capture across hospital episode statistics and disease registries, alongside training across the  
22 NHS to support staff having positive conversations about sexual orientation, which will build over  
23 time a much clearer picture of the health inequalities in this group and potentially help to reduce  
24 them.  
25

### 26 **Implications for research**

27  
28 This rigorously conducted systematic review has reported some important new findings on health  
29 inequalities in SMW that are hard to explain. Further research would be useful on these health  
30 inequalities, including their causes. For example, we do not know if there are consistently different  
31 hormone levels in SMW, which might be driving some of these findings, so further research on a  
32 variety of hormone levels could be very useful. This would be supported by the routine collection of  
33 sexual identity measures in population-level epidemiological studies, and the results published.  
34 Robust multi-level modelling (including sexual identity) should be conducted with large databases  
35 and cohort studies. For asthma, results from large cohort studies, controlled for risk factors such as  
36 smoking and overweight/obesity would be useful to further examine these findings. Regarding  
37 hypertension and CVD, the findings are also unexpected so investigation into potential causes would  
38 be very useful, such as possible differences in hormone levels, or other environmental, social,  
39 physiological, psychological or genetic factors that might be contributing to these results.  
40  
41  
42  
43  
44  
45  
46  
47  
48  
49  
50  
51  
52  
53  
54  
55  
56  
57  
58  
59  
60

## References

1. Public Health England. Producing modelled estimates of the size of the lesbian, gay and bisexual (LGB) population of England. 2016  
[https://www.gov.uk/government/uploads/system/uploads/attachment\\_data/file/585349/PE\\_Final\\_report\\_FINAL\\_DRAFT\\_14.12.2016NB230117v2.pdf](https://www.gov.uk/government/uploads/system/uploads/attachment_data/file/585349/PE_Final_report_FINAL_DRAFT_14.12.2016NB230117v2.pdf)
2. Committee on Lesbian, Gay, Bisexual and Transgender Health Issues and Research Gaps and Opportunities. The health of lesbian, gay, bisexual and transgender (LGBT) people: building a foundation for better understanding; Board on the Health of Select Populations; Institute of Medicine, The National Academy of Science. Washington DC, 2011.
3. Coulter RW, Kenst KS, Bowen DJ, Scout S. Research funded by the National Institutes of Health on the health of the lesbian, gay, bisexual and transgender populations. *American Journal of Public Health* 2014;104(2):e105-12
4. Meads C, Pennant M, McManus J, Bayliss S. A systematic review of lesbian, gay, bisexual and transgender health in the West Midlands region of the UK compared to published UK research. University of Birmingham: Birmingham 2009  
<http://www.birmingham.ac.uk/Documents/collegemds/haps/projects/WMHTAC/REPreports/2009/LGBThealth030409finalversion.pdf>
5. Hudson-Sharp N, Metcalf H. Inequality among lesbian, gay bisexual and transgender groups in the UK: a review of evidence. National Institute of Economic and Social Research, London 2016
6. Edmondson D, Hodges R, Williams H. The lesbian, gay, bisexual and trans public health outcomes framework companion document, 2016 update. National LGB&T Partnership, 2016
7. Blondeel K, Say L, Chou D, Toskin R, Khosla R, Scolaro E, et al. Evidence and knowledge gaps on the disease burden in sexual and gender minorities: a review of systematic reviews. *International Journal for Equity in Health* 2016;15:16
8. Wang H, Naghavi M, Allen C, Barber RM, Bhutta Z, Carter A et al. Global, regional, and national life expectancy, all-cause mortality, and cause-specific mortality for 249 causes of death, 1980–2015: a systematic analysis for the Global Burden of Disease Study 2015. *Lancet* 2016;388(10053):1459–1544
9. Eliason M. Chronic Physical Health Problems in Sexual Minority Women: Review of the Literature. *LGBT Health*. 2015;1(4):259-69
10. Simoni J, Smith L, Oost KM, Lehavot K, Fredriksen-Goldsen K ( ): Disparities in Physical Health Conditions Among Lesbian and Bisexual Women: A Systematic Review of Population-Based Studies, *Journal of Homosexuality* 2016, DOI: 10.1080/00918369.2016.1174021
11. Higgins G, Green S (eds). *Cochrane Handbook of systematic reviews of interventions*. Wiley-Blackwell, Chichester, 2008
12. Blosnich JR, Lee JG, Bossarte R, Silenzio VM. Asthma disparities and within-group differences in a national probability sample of same-sex partnered adults. *American Journal of Public Health* 2013;103(9):e83-7
13. Blosnich JR, Farmer GW, Lee JG, Silenzio VM, Bowen DJ. Health inequalities among sexual minority adults: Evidence from ten U.S. states 2010. *American Journal of Preventive medicine* 2014;46(4):337-49
14. Boehmer U, Miao X, Linkletter C, Clark MA. Health conditions in younger, middle and older ages: are there differences by sexual orientation? *LGBT Health* 2014;1(3):168-76

15. Conron KJ, Mimiaga MJ, Landers SJ. A population-based study of sexual orientation identity and gender differences in adult health. *American Journal of Public Health*. 2010;100:1953–1960
16. Dilley JA, Simmons KW, Boysun MJ, Pizacani BA, Stark MJ. Demonstrating the importance and feasibility of including sexual orientation in public health surveys: Health disparities in the Pacific Northwest. *American Journal of Public Health* 2010;100(3):460-7
17. Everett B, Mollborn S. Differences in hypertension by sexual orientation among U.S. young adults. *Journal of community Health* 2013;38:588-96
18. Farmer GW, Jabson JM, Bucholz KK, Bowen DJ. A Population-Based Study of Cardiovascular Disease Risk in Sexual-Minority Women. *American Journal of Public Health*. 2013;103:1845–1850
19. Fredriksen-Goldsen KI, Kim H-J, Barkan SE. Disability Among Lesbian, Gay, and Bisexual Adults: Disparities in Prevalence and Risk *American Journal of Public Health*. 2012;102: e16–e21.
20. Fredriksen-Goldsen KI, Kim H-J, Barkan SE, Muraco A, Hoy-Ellis CP. Health disparities among lesbian, gay and bisexual older adults: results from a population-based study. *American Journal of Public Health* 2013;103(10):1802-9
21. Frisch M, Simonsen J. Marriage, cohabitation and mortality in Denmark: national cohort study of 6.5 million persons followed for up to three decades (1982–2011). *International Journal of Epidemiology* 2013;42:559–578
22. Garland-Forshee RY, Fiala SC, Ngo DL, Moseley K. Sexual orientation and sex differences in adult chronic conditions, health risk factors, and protective health practices, Oregon, 2005–2008. *Preventing Chronic Disease* 2014;11:140126.
23. Jackson CL, Agenor M, Johnson DA, Bry Austin S, Kawachi I. Sexual orientation identity disparities in health behaviors, outcomes, and services use among men and women in the United States: a cross-sectional study. *BMC Public Health* (2016) 16:807
24. Kann L, O’ Malley Olsen E, McManus T, Harris WA, Shanklin SL, Flint KH, Queen B, Lowry R, Chven D, Whittle L, Thornton J, Lim C, Yanakawa Y, Brener N, Zaza S. Sexual Identity, Sex of Sexual Contacts, and Health-Related Behaviors Among Students in Grades 9–12 – United States and Selected Sites, 2015. *MMWR*;2016;65(9):1-202
25. Matthews DD, Lee JG. A profile of North Carolina lesbian, gay and bisexual health disparities 2011. *American Journal of Public Health* 2014;104(6):e98-e105
26. McNair R, Hegarty K. Guidelines for the Primary Care of Lesbian, Gay, and Bisexual People: A Systematic Review. *Annals of Family Medicine* 2010;8:533-541
27. Ward BW, Joestl SS, Galinsky AM, Dahlhamer JM. Selected Diagnosed Chronic Conditions by Sexual Orientation: A National Study of US Adults, 2013. *Preventing Chronic Disease* 2015;12:150292
28. Clark CJ, Borowsky IW, Salisbury J, Usher J, Spencer RA, Przedworski JM, Renner LM, Fisher C, Everson-Rose SA. Disparities in long-term cardiovascular disease risk by sexual identity: The National Longitudinal Study of Adolescent to Adult Health. *Preventive Medicine* 2015;76:26-30
29. Wallace SP, Cochran SD, Durazo EM, Ford CL. The health of aging lesbian, gay and bisexual adults in California. Los Angeles. UCLA Center for Health Policy Research 2011.
30. Thomas M; Bruton A; Moffat M; Cleland J. Asthma and psychological dysfunction. *Primary Care Respiratory Journal: Journal of the General Practice Airways Group*. 2011;20 (3): 250–6
31. Semlyen J, King M, Varney J, Hagger-Johnson G. Sexual orientation and symptoms of common mental disorder or low wellbeing: combined meta-analysis of 12 UK population health surveys. *BMC Psychiatry* 2016;16:67

- 1  
2  
3 32. King M, Semlyen J, See Tai S, Killaspy H, Osborn D, Popelyuk D, Nazareth I. A systematic  
4 review of mental disorder, suicide, and deliberate self harm in lesbian, gay and bisexual  
5 people. *BMC Psychiatry* 2008;8:70  
6  
7 33. Eliason MJ, Ingraham N, Fogel SC, McElroy JA, Lorvick J, Mauery DR, Haynes S. A systematic  
8 review of the literature on weight in sexual minority women. *Women's Health Issues*  
9 2015;25(2): 162–175  
10  
11 34. Meng L; Chen D; Yang Y; Zheng Y; Hui R. Depression increases the risk of hypertension  
12 incidence: a meta-analysis of prospective cohort studies. *Journal of Hypertension*.  
13 2012;30(5):842–51.  
14  
15 35. Dahlhamer JM, Galinsky AM, Joestl SS, Ward BW. Barriers to Health Care Among Adults  
16 Identifying as Sexual Minorities: A US National Study, *American Journal of Public Health*  
17 2016;106(6):1116-1122.  
18  
19 36. Urwin S, Whittaker W. Inequalities in family practitioner use by sexual orientation: evidence  
20 from the English General Practice Patient Survey. *BMJ Open* 2016;6:e011633  
21  
22 37. Alencar Albuquerque G, de Lima Garcia C, da Silva Quirino G, et al. Access to health services  
23 by lesbian, gay, bisexual, and transgender persons: systematic literature review. *BMC*  
24 *International Health and Human Rights*. 2016;16:2. doi:10.1186/s12914-015-0072-9.  
25  
26 38. Standardisation Committee for Care Information (SCCI). Advance Notification – New  
27 Information Standard.  
28 <http://content.digital.nhs.uk/media/22530/2094512015an/pdf/2094512015an.pdf> accessed  
29 March 2017  
30  
31  
32  
33  
34  
35  
36  
37  
38  
39  
40  
41  
42  
43  
44  
45  
46  
47  
48  
49  
50  
51  
52  
53  
54  
55  
56  
57  
58  
59  
60

## Tables and figures, with web appendix

Table 1. Characteristics of included studies.

Table 2. Prevalence of asthma by sexual orientation

Figure 1. Meta-analysis of asthma in lesbians and in bisexual women

### WEB APPENDIX

Web Table 1. Participant baseline characteristics

Web Table 2. CASP quality assessment results

Web Table 3. Prevalence of cardiovascular disease or CVD symptoms by sexual orientation

Web Table 4. Prevalence of hypertension or hypertensive medication use by sexual orientation

Web Table 5. Prevalence of any type of diabetes mellitus by sexual orientation

Web Figure 1. PRISMA flow diagram

Web Figure 2a. CVD in lesbians

Web Figure 2b. CVD in bisexual women

Web Figure 3a. Hypertension in lesbians

Web Figure 3b. Hypertension in bisexual women

Web Figure 4a. Diabetes mellitus in lesbians

Web Figure 4b. Diabetes mellitus in bisexual women



Table 1. Characteristics of included studies

| First author (year)                                                                    | Survey method, Exposure                                                                                                                  | Population, setting, country                                                                                                            | Sexual orientation/behaviour question                                                                                                                           | Comparison                          | Recruitment, data collection                                               | Outcomes of interest*           | Study design, funding                                             |
|----------------------------------------------------------------------------------------|------------------------------------------------------------------------------------------------------------------------------------------|-----------------------------------------------------------------------------------------------------------------------------------------|-----------------------------------------------------------------------------------------------------------------------------------------------------------------|-------------------------------------|----------------------------------------------------------------------------|---------------------------------|-------------------------------------------------------------------|
| <b>Mortality studies</b>                                                               |                                                                                                                                          |                                                                                                                                         |                                                                                                                                                                 |                                     |                                                                            |                                 |                                                                   |
| Frisch (2013)                                                                          | National demographic data from Danish Civil Registration System, including mortality data                                                | Population, marriage, living in same sex or opposite sex cohabitation for at least 1 year between 1982 and 2011, Denmark                | Cohabitation record, marriage record (same sex marriage from 1989, (NB 75.6% same sex cohabiting women were same sex married)                                   | Opposite sex cohabitation, marriage | National demographic data collection                                       | Mortality                       | Population cohort Supported by – not reported (NR)                |
| <b>Surveys based on multi-state Behavioral Risk Factor Surveillance System (BRFSS)</b> |                                                                                                                                          |                                                                                                                                         |                                                                                                                                                                 |                                     |                                                                            |                                 |                                                                   |
| Blosnich (2013)                                                                        | Telephone-based (landline) random digit dialled interview. Had ever been told by a health professional that they had (a named condition) | English or Spanish speaking non-institutionalized adults in partnerships. All states, USA                                               | Various similar in the 10 states with response options heterosexual or straight; homosexual, gay or lesbian; bisexual; other; and opposite or same sex partner. | Opposite sex partnered women        | Behavioral Risk Factor Surveillance System (BRFSS) for all US States 2004. | Current asthma, lifetime asthma | Population survey. Supported by a National Research Service award |
| Blosnich (2014)                                                                        | Telephone-based (landline) random digit dialled interview. Had ever been told by a health professional that they had (a named condition) | English or Spanish speaking non-institutionalized adults. Alaska, Arizona, California, Maine, Massachusetts, Montana, New Mexico, North | Various similar in the 10 states with response options heterosexual or straight; homosexual, gay or lesbian; bisexual; other.                                   | Heterosexual women                  | Behavioral Risk Factor Surveillance System (BRFSS) for 10 States 2010.     | CVD symptoms, asthma, diabetes  | Population survey. Supported by National Research Service awards. |

| First author (year)                                                                     | Survey method, Exposure                                                                                                                  | Population, setting, country                                                             | Sexual orientation n/behaviour question                                                                        | Comparison         | Recruitment, data collection                                             | Outcomes of interest*                                   | Study design, funding                                                                                         |
|-----------------------------------------------------------------------------------------|------------------------------------------------------------------------------------------------------------------------------------------|------------------------------------------------------------------------------------------|----------------------------------------------------------------------------------------------------------------|--------------------|--------------------------------------------------------------------------|---------------------------------------------------------|---------------------------------------------------------------------------------------------------------------|
|                                                                                         |                                                                                                                                          | Dakota, Washington, Wisconsin, USA                                                       |                                                                                                                |                    |                                                                          |                                                         |                                                                                                               |
| <b>Surveys based on single state Behavioral Risk Factor Surveillance System (BRFSS)</b> |                                                                                                                                          |                                                                                          |                                                                                                                |                    |                                                                          |                                                         |                                                                                                               |
| Conron (2010)                                                                           | Telephone-based (landline) random digit dialled interview. Had ever been told by a health professional that they had (a named condition) | English, Spanish or Portuguese speaking non-institutionalized adults. Massachusetts, USA | A heterosexual or straight, B homosexual, gay or lesbian, C bisexual or D something else? (D answers excluded) | Heterosexual women | Massachusetts Behavioral Risk Factor Surveillance System (BRFSS) 2001-8. | Heart disease, diabetes, asthma                         | Population survey. Supported by Massachusetts Department of Public Health HIV/AIDS Bureau and Ford Foundation |
| Garland-Forshee (2014)                                                                  | Telephone-based (landline) random digit dialled interview. Had ever been told by a health professional that they had (a named condition) | English or Spanish speaking non-institutionalized adults, Oregon, USA                    | A heterosexual or straight, B homosexual, gay or lesbian, C bisexual or D other? (D answers excluded)          | Heterosexual women | Oregon Behavioral Risk Factor Surveillance System 2005-8                 | Cardiovascular disease, hypertension, diabetes, asthma  | Population survey. Supported by Center for Disease Control grants.                                            |
| Matthews (2014)                                                                         | Telephone-based (landline) random digit dialled interview. Had ever been told by a health professional that they had (a named condition) | English or Spanish speaking non-institutionalized adults. North Carolina, USA            | A heterosexual or straight, B homosexual, gay or lesbian, C bisexual or D other? (D answers excluded)          | Heterosexual women | North Carolina Behavioral Risk Factor Surveillance System 2011           | Angina or heart disease, hypertension, diabetes, asthma | Population survey. Supported by National Institute for Mental Health grant.                                   |
| Dilley (2010) and                                                                       | Telephone-based (landline) random digit dialled                                                                                          | English or Spanish speaking non-institutionalized                                        | A heterosexual or straight, B homosexual                                                                       | Heterosexual women | Washington State Behavioral Risk Factor Surveillance                     | Diabetes, hypertension, (asthma),                       | Population survey. Supported by Washington                                                                    |

| First author (year)                                        | Survey method, Exposure                                                                                                                  | Population, setting, country                                                           | Sexual orientation/behaviour question                                                                          | Comparison                      | Recruitment, data collection                                                 | Outcomes of interest*                                                                                                                     | Study design, funding                                                                 |
|------------------------------------------------------------|------------------------------------------------------------------------------------------------------------------------------------------|----------------------------------------------------------------------------------------|----------------------------------------------------------------------------------------------------------------|---------------------------------|------------------------------------------------------------------------------|-------------------------------------------------------------------------------------------------------------------------------------------|---------------------------------------------------------------------------------------|
|                                                            | interview. Had ever been told by a health professional that they had (a named condition)                                                 | sed adults. Washington, USA                                                            | al, gay or lesbian, C bisexual or D something else? (D answers excluded)                                       |                                 | e System (BRFSS) 2003-6.                                                     |                                                                                                                                           | State Tobacco Prevention and Control Program and BRFSS                                |
| Fredriksen-Goldsen (2012) and                              | Telephone-based (landline) random digit dialled interview. Had ever been told by a health professional that they had (a named condition) | English or Spanish speaking non-institutionalised adults. Washington, USA              | A heterosexual or straight, B homosexual, gay or lesbian, C bisexual or D something else? (D answers excluded) | Heterosexual women              | Washington State Behavioral Risk Factor Surveillance System (BRFSS) 2003-9.  | Asthma                                                                                                                                    | Population survey. Supported by NIH and National Institute on Aging grants            |
| Fredriksen-Goldsen (2013)                                  | Telephone-based (landline) random digit dialled interview. Had ever been told by a health professional that they had (a named condition) | English or Spanish speaking non-institutionalised adults aged over 50. Washington, USA | A heterosexual or straight, B homosexual, gay or lesbian, C bisexual or D something else? (D answers excluded) | Heterosexual women aged over 50 | Washington State Behavioral Risk Factor Surveillance System (BRFSS) 2003-10. | Cardiovascular disease (asthma, diabetes, hypertension),                                                                                  | Population survey. Supported by National Institute on Aging grant                     |
| <b>Studies based on other US national or state surveys</b> |                                                                                                                                          |                                                                                        |                                                                                                                |                                 |                                                                              |                                                                                                                                           |                                                                                       |
| Jackson (2016) and Ward (2015)                             | In-person interviews using cluster-based probability sampling. Had ever been told by a health professional that they had (a named        | Non-institutionalised adults. USA                                                      | Straight (not lesbian or gay); gay or lesbian; bisexual; something else? (something else answers excluded)     | Straight women                  | National Health Interview Survey 2013-14                                     | Diabetes, heart disease (CHD or any other kind of heart disease, angina pectoris or a myocardial infarction), stroke, hypertension Asthma | Population survey Supported by several grants including from Harvard Catalyst and NIH |

| First author (year) | Survey method, Exposure                                                                                                           | Population, setting, country                                     | Sexual orientation/behaviour question                                                                                                                                                                                                                           | Comparison                                                  | Recruitment, data collection                    | Outcomes of interest*                                                  | Study design, funding                                                    |
|---------------------|-----------------------------------------------------------------------------------------------------------------------------------|------------------------------------------------------------------|-----------------------------------------------------------------------------------------------------------------------------------------------------------------------------------------------------------------------------------------------------------------|-------------------------------------------------------------|-------------------------------------------------|------------------------------------------------------------------------|--------------------------------------------------------------------------|
|                     | condition), or diagnosed by a doctor (CVD)                                                                                        |                                                                  |                                                                                                                                                                                                                                                                 |                                                             |                                                 | (Ward)                                                                 |                                                                          |
| Kann (2016)         | School questionnaire - based survey, nationally representative data. Had ever been told by a doctor or nurse that they had asthma | Students in grades 9–12 (aged 14–18) attending high schools, USA | Which of the following best describes you? “heterosexual (straight),” “gay or lesbian,” “bisexual,” or “not sure.” AND During your life, with whom have you had sexual contact? “I have never had sexual contact,” “females,” “males,” and “females and males.” | Heterosexual female students AND Sexual contact with males. | Youth Risk Behavior Surveillance System (YRBSS) | Lifetime asthma                                                        | Population survey Supported by Center for Disease Control and Prevention |
| Boehmer (2014) and  | Telephone-based random digit dialled interview. Had ever been told by a health professional that they had (a named condition)     | Adults aged over 20 with telephone and living in California      | Identified as heterosexual; gay or lesbian; bisexual (excluded celibate and non-sexual responses)                                                                                                                                                               | Heterosexual women                                          | California Health Interview Survey 2001-7       | Heart disease, hypertension, hypertensive medication, diabetes, asthma | Population survey. Supported by – NR                                     |
| Wallace (2011)      | Telephone-based survey.                                                                                                           | Lesbian and bisexual women                                       | NR                                                                                                                                                                                                                                                              | Heterosexual women                                          | California Health Interview                     | (Heart disease, hypertension                                           | Population survey. Supported                                             |

| First author (year)                                    | Survey method, Exposure                                                                                                                                                                                 | Population, setting, country                                                                 | Sexual orientation/behaviour question                                                                                                                                                                               | Comparison              | Recruitment, data collection                                       | Outcomes of interest*                                                                                         | Study design, funding                                                                                                                                                                                               |
|--------------------------------------------------------|---------------------------------------------------------------------------------------------------------------------------------------------------------------------------------------------------------|----------------------------------------------------------------------------------------------|---------------------------------------------------------------------------------------------------------------------------------------------------------------------------------------------------------------------|-------------------------|--------------------------------------------------------------------|---------------------------------------------------------------------------------------------------------------|---------------------------------------------------------------------------------------------------------------------------------------------------------------------------------------------------------------------|
|                                                        | Question NR                                                                                                                                                                                             | aged 50-70                                                                                   |                                                                                                                                                                                                                     | aged 50-70              | Surveys 2003-7                                                     | , diabetes,)                                                                                                  | by California Wellness Foundation                                                                                                                                                                                   |
| Farmer (2013)                                          | In-home survey. Had ever been told by a health professional that they had diabetes or sugar diabetes, responded yes to currently taking anti-hypertensives                                              | Adults aged 20-69 who completed the sexual behaviour survey. National, USA                   | Do you think of yourself as heterosexual or straight (attracted only to men); homosexual or lesbian (sexually attracted only to women); bisexual (sexually attracted to men and women); something else or not sure. | Heterosexual women      | National Health and Nutrition Examination Survey (NHANES) 2001-8   | Diabetes, anti-hypertensive medication                                                                        | National population survey Supported by National Institute for Drug Abuse and National Institute on Alcohol Use and Alcoholism grants.                                                                              |
| <b>Studies based on single waves of cohort studies</b> |                                                                                                                                                                                                         |                                                                                              |                                                                                                                                                                                                                     |                         |                                                                    |                                                                                                               |                                                                                                                                                                                                                     |
| Everett (2013) and Clark (2015)                        | Interviewer collected Hypertension results (Everett) and diabetes from fasting blood glucose sample, non-fasting glucose sample, HbA1c or self-report health provider diagnosis or use of anti-diabetic | Follow up 10-15 years after, from sample recruited originally through schools. National, USA | 100% heterosexual (straight); mostly heterosexual (straight) but somewhat attracted to people of your own sex; bisexual – attracted to males and females equally; mostly homosexual (gay)                           | 100% heterosexual women | Wave IV of National Longitudinal Study of Adolescent Health 2007-8 | Everett 2013 - Hypertension of >140 SBP and >90 DBP. Clarke 2015 - Diabetes (and antihypertensive medication) | National population cohort Supported by Eunice Shriver National Institute of Child Health and Human Development grant. (Everett 2013) and National Center for Advancing translational sciences grant. (Clarke 2015) |

| First author (year) | Survey method, Exposure                                                                                         | Population, setting, country                                                     | Sexual orientation/behaviour question                                                | Comparison                     | Recruitment, data collection                                                                          | Outcomes of interest* | Study design, funding                                            |
|---------------------|-----------------------------------------------------------------------------------------------------------------|----------------------------------------------------------------------------------|--------------------------------------------------------------------------------------|--------------------------------|-------------------------------------------------------------------------------------------------------|-----------------------|------------------------------------------------------------------|
|                     | medication in previous 4 weeks (Clarke 2015)                                                                    |                                                                                  | but somewhat attracted to people of the opposite sex; 100% homosexual (gay).         |                                |                                                                                                       |                       |                                                                  |
| McNair (2011)       | Self-completion questionnaire. Had been diagnosed or treated for a range of illnesses over the previous 3 years | Original sample aged 18-23 selected randomly from database of Medicare Australia | Exclusively heterosexual, mainly heterosexual, bisexual, mainly homosexual (lesbian) | Exclusively heterosexual women | Third survey of the young cohort of women in the Australian Longitudinal Study on Women's Health 2003 | Asthma,               | National population cohort Supported by Lesbian Health Fund, USA |

\* outcomes in brackets were reported in included study texts but not used in the systematic review due to elimination of duplicate reporting.

**Table 2. Prevalence of asthma by sexual orientation**

| Study name                               | Heterosexual             | Lesbian                     | AOR<br>(95%CI)          | Bisexual                    | AOR<br>(95%CI)          | SMW                         | AOR<br>(95%CI)             |
|------------------------------------------|--------------------------|-----------------------------|-------------------------|-----------------------------|-------------------------|-----------------------------|----------------------------|
| Blosnich 2014&                           | 15.3%#<br>(SE 0.003)     | 22.2%#<br>(SE 0.03)         | 1.50 (1.04<br>to 2.16)* | 26.4%#<br>(SE 0.04)         | 1.68 (1.07<br>to 2.63)* |                             |                            |
| Blosnich 2013<br>(lifetime<br>diagnosis) | 14.6%#<br>(NR)           |                             |                         |                             |                         | 26.1%#<br>(NR)              | 1.72<br>(1.11 to<br>2.65)* |
| Blosnich 2013<br>(current<br>diagnosis)  | 9.5%<br>(NR)             |                             |                         |                             |                         | 21.4%<br>(NR)               | 2.09<br>(1.30 to<br>3.36)* |
| Boehmer<br>2014£                         | 13.7%<br>(SE 0.16)       | 20.8%<br>(SE 1.70)          | 1.41 (1.14<br>to 1.73)* | 21.5%<br>(SE 1.76)          | 1.52 (1.24<br>to 1.87)* | NR                          | NR                         |
| Conron 2010&                             | 17.4%#<br>(SE 0.3)       | 24.9%#<br>(SE 2.3)          | 1.68 (1.32<br>to 2.14)  | 25.7%#<br>(SE 3.1)          | 1.58 (1.15<br>to 2.18)  | NR                          | NR                         |
| Fredriksen-<br>Goldsen<br>2012&          | 16.5%#                   | 19.9%#                      | 1.23 (NR)               | 31.9%#                      | 2.17 (NR)*              | NR                          | NR                         |
| Garland-<br>Forshee<br>2014&             | 12.1%#<br>(11.5 to 12.7) | 15.4%#<br>(10.8 to<br>21.7) | 1.2 (0.8 to<br>1.9)     | 25.6%#<br>(18.6 to<br>34.2) | 2.4 (1.5 to<br>3.6)*    | NR                          | NR                         |
| Kann 2016 by<br>sexual identity          | 23.0%#<br>(21.1 to 24.9) | NR                          | NR                      | NR                          | NR                      | 28.3%#<br>(24.4 to<br>32.6) | NR                         |
| Kann 2016 by<br>sexual<br>behaviour      | 25.8%#<br>(23.5 to 28.2) | NR                          | NR                      | NR                          | NR                      | 31.4%#<br>(26.9 to<br>36.4) | NR                         |
| Matthews<br>2014                         | 15.7%#                   | NR                          | NR                      | NR                          | NR                      | 27.7%#                      | 1.94<br>(0.96 to<br>3.92)  |
| McNair 2011£                             | 9.4%                     | 10.4%                       | NR                      | 18.0%*                      | NR                      | NR                          | NR                         |
| Ward 2015<br>(current<br>diagnosis)      | 8.5% (7.9 to<br>9.0)     | 9.5% (6.2<br>to 14.4)       | 1.11 (0.70<br>to 1.76)  | 12.4%<br>(7.3 to<br>20.4)   | 1.53 (0.87<br>to 2.70)  | NR                          | NR                         |

\* - statistically significant to  $p < 0.05$  or less, # - weighted percentages, & - calculated from weighted percentages, £ - calculated from unweighted percentages, RR – relative risk.

1  
2  
3 Figure 1. Meta-analysis of asthma in lesbians and in bisexual women  
4  
5  
6  
7  
8  
9  
10  
11  
12  
13  
14  
15  
16  
17  
18  
19  
20  
21  
22  
23  
24  
25  
26  
27  
28  
29  
30  
31  
32  
33  
34  
35  
36  
37  
38  
39  
40  
41  
42  
43  
44  
45  
46  
47  
48  
49  
50  
51  
52  
53  
54  
55  
56  
57  
58  
59  
60

For peer review only



1  
2  
3 Title: A systematic review and meta-analysis of diabetes mellitus, cardiovascular and respiratory  
4 condition epidemiology in sexual minority women.  
5

6  
7 Authors: Catherine Meads<sup>1</sup>, Adam Martin<sup>2</sup>, Jeffrey Grierson<sup>1</sup>, Justin Varney<sup>3</sup>  
8  
9

## 10 WEB APPENDIX 11

12  
13  
14 Web supplement 1. Search strategy for Medline, Embase, PsycInfo and CAB Abstracts. Dec 2016  
15

16 Web Table 1. Participant baseline characteristics

17 Web Table 2. Critical Appraisal Skills Programme (CASP) quality assessment results

18 Web Table 3. Prevalence of cardiovascular disease or CVD symptoms by sexual orientation

19 Web Table 4. Prevalence of hypertension or hypertensive medication use by sexual orientation  
20

21 Web Table 5. Prevalence of any type of diabetes mellitus by sexual orientation  
22

23  
24  
25  
26 Web Figure 1. PRISMA flow diagram

27  
28 Web Figure 2a. CVD in lesbians

29  
30 Web Figure 2b, CVD in bisexual women

31  
32 Web Figure 3a. Hypertension in lesbians

33  
34 Web Figure 3b. Hypertension in bisexual women

35  
36 Web Figure 4a. Diabetes mellitus in lesbians

37  
38 Web Figure 4b. Diabetes mellitus in bisexual women  
39  
40  
41  
42  
43  
44  
45  
46  
47  
48  
49  
50  
51  
52  
53  
54  
55  
56  
57  
58  
59  
60

1  
2  
3 Web Supplement 1. – Search strategy for Medline, Embase, PsycInfo and CAB Abstracts. December  
4 2016  
5  
6

7 Database: Ovid MEDLINE(R) 1948 to Present (including In-Process & Other Non-Indexed Citations)  
8

9 Search Strategy:  
10

11 -----  
12  
13 1 lesbian.mp. or Homosexuality, Female/ (5704)  
14 2 Bisexuality/ or bisexual women.mp. (4142)  
15 3 wsw.mp. (120)  
16 4 WSMW.mp. (5)  
17 5 sexual orientation.mp. or Sexual Behavior/ (56050)  
18 6 sexual identity.mp. (1251)  
19 7 queer.mp. or Homosexuality/ (13250)  
20 8 1 or 2 or 3 or 4 or 5 or 6 or 7 (70952)  
21 9 limit 8 to yr="2015 -Current" (4625)  
22 10 limit 9 to female (3011)  
23 11 Great Britain/ or UK.mp. (276229)  
24 12 10 and 11 (62)  
25

26  
27 SEARCH QUERY - EMBASE  
28

29 -----  
30  
31 (((('homosexual female':ab,ti or 'bisexual female':ab,ti or 'women who have sex with women':ab,ti  
32 and [2015-2016]/py) or ('homosexual female'/exp or 'homosexual female') or 'bisexual female' or  
33 'women who have sex with women' or wsw or wsmw) and (2015:py or 2016:py or 2017:py)) and  
34 'united kingdom'  
35  
36  
37  
38

39 Database: PsycINFO <1967 to November Week 1 2016>  
40

41 Search Strategy:  
42

43 -----  
44  
45 1 exp Lesbianism/ or exp Sexual Orientation/ or exp Homosexuality/ or exp Bisexuality/ or  
46 lesbian\$.mp. (30632)  
47 2 bisexual women.mp. (613)  
48 3 wsw.mp. (46)  
49 4 wsmw.mp. (2)  
50 5 sexual identity.mp. (3150)  
51 6 queer.mp. (3030)  
52 7 1 or 2 or 3 or 4 or 5 or 6 (32610)  
53 8 limit 7 to (human and yr="2015 -Current") (3331)  
54 9 limit 8 to female (1815)  
55 10 Great britain.mp. (2848)  
56 11 united kingdom.mp. (8990)  
57

- 12 uk.mp. (30316)
- 13 british.mp. (20760)
- 14 gb.mp. (241)
- 15 english.mp. (118463)
- 16 scottish.mp. (2638)
- 17 welsh.mp. (1111)
- 18 irish.mp. (3268)
- 19 10 or 11 or 12 or 13 or 14 or 15 or 16 or 17 or 18 (177759)
- 20 9 and 19 (57)

Database: CAB Abstracts <1973 to 2016 Week 44>

Search Strategy:

- 
- 1 exp Lesbianism/ or exp Sexual Orientation/ or exp Homosexuality/ or exp Bisexuality/ or lesbian\$.mp. (2168)
  - 2 bisexual women.mp. (25)
  - 3 wsw.mp. (100)
  - 4 wsmw.mp. (1)
  - 5 sexual identity.mp. (113)
  - 6 queer.mp. (104)
  - 7 1 or 2 or 3 or 4 or 5 or 6 (2365)
  - 8 limit 7 to (human and yr="2015 -Current") [Limit not valid in CAB Abstracts; records were retained] (412)
  - 9 limit 8 to female [Limit not valid in CAB Abstracts; records were retained] (412)
  - 10 Great britain.mp. (34833)
  - 11 united kingdom.mp. (152174)
  - 12 uk.mp. (170127)
  - 13 british.mp. (188436)
  - 14 gb.mp. (8148)
  - 15 english.mp. (41160)
  - 16 scottish.mp. (5784)
  - 17 welsh.mp. (3198)
  - 18 irish.mp. (15558)
  - 19 10 or 11 or 12 or 13 or 14 or 15 or 16 or 17 or 18 (252567)
  - 20 9 and 19 (10)

Web Table 1. Participant baseline characteristics

|                 | <b>Number of heterosexual women</b> | <b>Age</b>          | <b>Ethnicity</b>                                    | <b>Number of lesbians/bisexual/SMW</b> | <b>Age</b>                                                        | <b>Ethnicity</b>                                                                                                          | <b>Demographic imbalances compared to heterosexual women.</b>                                                                       | <b>Prevalence estimates weighted by:</b>               | <b>Adjusted odds ratios weighted by:</b>                                               |
|-----------------|-------------------------------------|---------------------|-----------------------------------------------------|----------------------------------------|-------------------------------------------------------------------|---------------------------------------------------------------------------------------------------------------------------|-------------------------------------------------------------------------------------------------------------------------------------|--------------------------------------------------------|----------------------------------------------------------------------------------------|
| Blosnich (2014) | 51,639                              | Mean 47.3 (SE 0.16) | 61.4% white, 3.6% black, 26.3% Hispanic             | 615 lesbians, 451 bisexual women       | Mean 43.1 (SE 1.33)<br>lesbians, 35.1 (SE 1.41)<br>bisexual women | 70.8% white, 4.3% black, 15.9% Hispanic<br>lesbians, 61.1% white, 5.5% black, 24.0% Hispanic<br>bisexual women            | SMW younger, fewer partnered, lesbians more educated, more employed, bisexual women less educated, fewer employed, less income.     | Age race/ethnicity, education, income                  | Age race/ethnicity, education, income (only conducted where bivariate analyses p<0.05) |
| Blosnich (2013) | 53,875 opposite sex partnered       | Mean 33.0 (SE 0.06) | 67.5% white                                         | 433 same-sex partnered                 | Mean 32.7 (SE 0.69)                                               | 72.6% white                                                                                                               | Same sex partnered lower income,                                                                                                    | Education, income, race/ethnicity, overweight, smoking | 'weighted to account for sampling design'                                              |
| Boehmer (2014)  | 90,608                              | Mean 43.0 (SE 0.03) | 50.1% white, 6.5% black, 13.0% Asian 24.6% Hispanic | 1,265 lesbians, 1,369 bisexual women   | Mean 42.4 (SE 0.47)<br>lesbians, 36.3 (SE 0.53)<br>bisexual women | 68.5% white, 7.4% black, 4.9% Asian<br>lesbians, 57.6% white, 10.0% Asian<br>7.0% black, 16.9% Hispanic<br>bisexual women | SMW younger, more white, more educated, more US born, lesbians more income, bisexual women less income, fewer with health insurance | Unadjusted prevalence reported                         | Age, race/ethnicity, education, household income, nativity                             |
| Conron (2010)   | 39,701                              | 35.2% aged 18-33    | 83.2% white, 4.1% black, 2.6% Asian, 8.9% Hispanic  | 719 lesbian, 432 bisexual women        | 30.4% lesbians, 65.1% bisexual women aged 18-33                   | 87.2% white, 4.5% black, 1.2% Asian, 5.7% Hispanic<br>lesbian, 78.9% white,                                               | Lesbians more educated                                                                                                              | Age, gender                                            | Age, gender, education, income                                                         |

1  
2  
3  
4  
5  
6  
7  
8  
9  
10  
11  
12  
13  
14  
15  
16  
17  
18  
19  
20  
21  
22  
23  
24  
25  
26  
27  
28  
29  
30  
31  
32  
33  
34  
35  
36  
37  
38  
39  
40  
41  
42  
43  
44  
45  
46  
47

|                   | Number of heterosexual women | Age                            | Ethnicity                                          | Number of lesbians/bisexual/SMW                                             | Age                                                                                                                                                        | Ethnicity                                                                                  | Demographic imbalances compared to heterosexual women.                                          | Prevalence estimates weighted by:           | Adjusted odds ratios weighted by:  |
|-------------------|------------------------------|--------------------------------|----------------------------------------------------|-----------------------------------------------------------------------------|------------------------------------------------------------------------------------------------------------------------------------------------------------|--------------------------------------------------------------------------------------------|-------------------------------------------------------------------------------------------------|---------------------------------------------|------------------------------------|
|                   |                              |                                |                                                    |                                                                             |                                                                                                                                                            | 4.7% black, 5.7% Asian, 9.3% Hispanic bisexual women                                       |                                                                                                 |                                             |                                    |
| Dilley (2010)     | 47,505                       | Mean 46.3                      | 85.6% white, 1.8% black, 3.6% Asian, 7.1% Hispanic | 589 lesbian, 561 bisexual women                                             | Mean 40.0 lesbian, 32.9 bisexual women.                                                                                                                    | 85.5% white, 1.6% black, 3.1% Asian, 7.2% Hispanic                                         | More higher education in lesbians, less in bisexual women. Lesbians and bisexuals lower income. | Assumed that unadjusted prevalence reported | Sexual orientation, age, education |
| Everett (2013)    | 6,072                        | Mean 28.7 (whole sample)       | NR                                                 | 138 gay/mostly gay 1345 bisexual/ mostly heterosexual,                      | NR                                                                                                                                                         | NR                                                                                         | NR                                                                                              | Possibly unadjusted prevalence reported     | N/A                                |
| and Clarke (2015) | 5713                         | Mean 28.8 (95%CI 28.6 to 29.1) | 67.7% white                                        | 71 homosexual, 60 mostly homosexual, 154 bisexual, 1089 mostly heterosexual | Mean (95%CI) 28.9 (28.3 to 29.5), homosexual, 28.4 (27.8 to 29.0) mostly homosexual, 28.3 (27.9 to 28.6) bisexual, 28.5 (28.2 to 28.7) mostly heterosexual | White 64.1% homosexual, 73.2% mostly homosexual, 69.4% bisexual, 77.5% mostly heterosexual | NR                                                                                              | See above                                   | N/A                                |
| Farmer (2013)     | 5,356                        | 36.2% aged                     | 69.8% white,                                       | 437 SMW                                                                     | 49.2% aged 20-29                                                                                                                                           | 73.4% white, 13.2% black,                                                                  | SMW younger                                                                                     | Possibly unadjusted                         | N/A                                |

|                            | Number of heterosexual women | Age                 | Ethnicity                       | Number of lesbians/bisexual/SMW  | Age                                                        | Ethnicity                                                     | Demographic imbalances compared to heterosexual women.                                                                             | Prevalence estimates weighted by:                        | Adjusted odds ratios weighted by:                             |
|----------------------------|------------------------------|---------------------|---------------------------------|----------------------------------|------------------------------------------------------------|---------------------------------------------------------------|------------------------------------------------------------------------------------------------------------------------------------|----------------------------------------------------------|---------------------------------------------------------------|
|                            |                              | 20-29               | 12.0% black, 12.9% Hispanic     |                                  |                                                            | 8.6% Hispanic                                                 |                                                                                                                                    | prevalence reported                                      |                                                               |
| Fredrikse n-Goldsen (2012) | 49,092                       | Mean 46.6 (SE 0.12) | 83.7% white                     | 626 lesbians, 536 bisexual women | Mean 42.9 (SE 0.81) lesbian, 32.7 (SE 0.85) bisexual women | 85.4% white lesbian, 78.2% white bisexual women.              | SMW younger, fewer partnered, lesbians less education, bisexual women lower income                                                 | Age                                                      | Age, education, income                                        |
| Fredrikse n-Goldsen (2013) | 57,466                       | Mean 63.8 (SD 0.06) | 91.8% white                     | 562 lesbians, 291 bisexual women | Mean 58.6 (SD 0.37)                                        | 90.3% white                                                   | SMW more employed, fewer partnered, fewer less educated                                                                            | Unclear weighting factors                                | Age, education, income                                        |
| Frisch (2013)              | 61,993,266                   | Aged 18+            | NR                              | 655,941 same sex cohabiting      | Aged 18+                                                   | NR                                                            | NR                                                                                                                                 | (Mortality estimate - by age)                            | N/A                                                           |
| Garland-Forshee (2014)     | 25,602                       | 28.8% aged 18-34    | 86.7% white                     | 347 lesbians, 322 bisexual women | 26.9% lesbian, 62.3% bisexual women aged 18-34             | 81.6% lesbians, 85.8% bisexual women white                    | SMW less likely to be partnered, more education, more urban residence, Lesbians more employed, Bisexual women younger, less income | Unclear weighting factors                                | Age, education, relationship status, rural or urban residency |
| Jackson (2016)             | 37,185                       | NR                  | 68.3% white, 12.3% black, 12.9% | 525 lesbians, 353 bisexual women | NR                                                         | 71.4% white, 12.7% black, 12.5% Hispanic lesbian 73.5% white, | Lesbians more educated, fewer partnered, bisexual women less income                                                                | Age, ethnicity, educational attainment, annual household | Age race/ethnicity, education, income, occupational           |

1  
2  
3  
4  
5  
6  
7  
8  
9  
10  
11  
12  
13  
14  
15  
16  
17  
18  
19  
20  
21  
22  
23  
24  
25  
26  
27  
28  
29  
30  
31  
32  
33  
34  
35  
36  
37  
38  
39  
40  
41  
42  
43  
44  
45  
46  
47

|                       | Number of heterosexual women | Age              | Ethnicity                               | Number of lesbians/bisexual/SMW  | Age              | Ethnicity                               | Demographic imbalances compared to heterosexual women.                                             | Prevalence estimates weighted by:                              | Adjusted odds ratios weighted by:                                                                                 |
|-----------------------|------------------------------|------------------|-----------------------------------------|----------------------------------|------------------|-----------------------------------------|----------------------------------------------------------------------------------------------------|----------------------------------------------------------------|-------------------------------------------------------------------------------------------------------------------|
|                       |                              |                  | Hispanic                                |                                  |                  | 16.0% black, 7.2% Hispanic              | bisexual women                                                                                     | income, occupational class, health status, region of residence | class, health status, region of residence                                                                         |
| Ward (2015)           | 17,399                       | NR               | NR                                      | 296 lesbians, 121 bisexual women | NR               | NR                                      | NR                                                                                                 | As Jackson 2016 above                                          | Age, race/ethnicity, education, income, marriage status, employment, health insurance status, region of residence |
| Kann (2016) identity  | 6,105                        | NR               | NR                                      | 167 lesbian, 734 bisexual women  | NR               | NR                                      | NR                                                                                                 | Sex, race/ethnicity and grade                                  | N/A                                                                                                               |
| Kann (2016) behaviour | 3,054                        | NR               | NR                                      | 173 lesbians, 572 bisexual women | NR               | NR                                      | NR                                                                                                 | Sex, race/ethnicity and grade                                  | N/A                                                                                                               |
| Matthews (2014)       | 6,110                        | 25.7% aged 18-34 | 71.3% white, 20.7% black, 5.2% Hispanic | 86 SMW                           | 40.6% aged 18-34 | 77.7% white, 14.1% black, 1.7% Hispanic | SMW younger, more likely to use mobile phones                                                      | Survey design                                                  | Age                                                                                                               |
| McNair (2011)         | 8,083                        | 25-30            | NR                                      | 99 lesbians, 100 bisexual women  | 25-30            | NR                                      | SMW lower income, less likely to be partnered, fewer with children, more urban residence, Lesbians | Unclear weighting factors                                      | N/A                                                                                                               |

1  
2  
3  
4  
5  
6  
7  
8  
9  
10  
11  
12  
13  
14  
15  
16  
17  
18  
19  
20  
21  
22  
23  
24  
25  
26  
27  
28  
29  
30  
31  
32  
33  
34  
35  
36  
37  
38  
39  
40  
41  
42  
43  
44  
45  
46  
47

| Number of heterosexual women | Age | Ethnicity | Number of lesbians/bisexual/SMW | Age | Ethnicity | Demographic imbalances compared to heterosexual women. | Prevalence estimates weighted by: | Adjusted odds ratios weighted by: |
|------------------------------|-----|-----------|---------------------------------|-----|-----------|--------------------------------------------------------|-----------------------------------|-----------------------------------|
|                              |     |           |                                 |     |           | more educated, bisexual women less educated,           |                                   |                                   |

For peer review only



1  
2  
3  
4  
5  
6  
7  
8  
9  
10  
11  
12  
13  
14  
15  
16  
17  
18  
19  
20  
21  
22  
23  
24  
25  
26  
27  
28  
29  
30  
31  
32  
33  
34  
35  
36  
37  
38  
39  
40  
41  
42  
43  
44  
45  
46  
47

**Web Table 2. Critical Appraisal Skills Programme (CASP) quality assessment results**

| <b>Study</b>              | <b>1</b> | <b>2</b> | <b>3</b> | <b>4</b> | <b>5a</b> | <b>5b</b> | <b>6a</b> | <b>6b</b> | <b>9</b> | <b>10</b> | <b>11</b> |
|---------------------------|----------|----------|----------|----------|-----------|-----------|-----------|-----------|----------|-----------|-----------|
| Blosnich (2014)           | Y        | Y        | Y        | N        | n         | CT        | N/A       | N/A       | Y        | Y         | Y         |
| Blosnich (2013)           | Y        | Y        | CT       | N        | N         | CT        | N/A       | N/A       | Y        | Y         | Y         |
| Boehmer (2014)            | Y        | Y        | Y        | N        | CT        | N         | N/A       | N/A       | Y        | Y         | Y         |
| Clarke (2015)             | Y        | Y        | Y        | Y        | N         | CT        | N/A       | N/A       | Y        | Y         | Y         |
| Conron (2010)             | Y        | Y        | Y        | N        | N         | CT        | N/A       | N/A       | Y        | Y         | Y         |
| Dilley (2010)             | Y        | Y        | Y        | N        | N         | CT        | N/A       | N/A       | Y        | Y         | Y         |
| Everett (2013)            | Y        | Y        | Y        | Y        | N         | CT        | N/A       | N/A       | Y        | Y         | Y         |
| Farmer (2013)             | Y        | Y        | Y        | N        | N         | CT        | N/A       | N/A       | Y        | Y         | Y         |
| Fredriksen-Goldsen (2012) | Y        | Y        | Y        | N        | N         | CT        | N/A       | N/A       | Y        | Y         | Y         |
| Fredriksen-Goldsen (2013) | Y        | Y        | Y        | N        | N         | CT        | N/A       | N/A       | Y        | Y         | Y         |
| Frisch (2013)             | Y        | Y        | CT       | Y        | N         | CT        | CT        | Y         | Y        | Y         | N/A       |
| Garland-Forshee (2014)    | Y        | Y        | Y        | N        | N         | CT        | N/A       | N/A       | Y        | Y         | Y         |
| Jackson (2016)            | Y        | Y        | Y        | N        | N         | Y         | N/A       | N/A       | Y        | Y         | Y         |

| <b>Study</b>    | <b>1</b> | <b>2</b> | <b>3</b> | <b>4</b> | <b>5a</b> | <b>5b</b> | <b>6a</b> | <b>6b</b> | <b>9</b> | <b>10</b> | <b>11</b> |
|-----------------|----------|----------|----------|----------|-----------|-----------|-----------|-----------|----------|-----------|-----------|
| Kann (2016)     | Y        | Y        | Y        | N        | N         | Y         | N/A       | N/A       | Y        | Y         | Y         |
| Matthews (2014) | Y        | Y        | Y        | N        | CT        | CT        | N/A       | N/A       | Y        | Y         | Y         |
| McNair (2011)   | Y        | Y        | Y        | N        | N         | CT        | N/A       | N/A       | Y        | Y         | Y         |
| Ward (2015)     | Y        | Y        | Y        | N        | N         | CT        | N/A       | N/A       | Y        | Y         | Y         |

The checklist questions were 1. Did the study address a clearly focused issue? 2. Was the cohort recruited in an acceptable way? 3. Was the exposure accurately measured to minimise bias? 4. Was the outcome accurately measured to minimise bias? 5a. Have the authors identified all important confounding factors? 5b) Have they taken account of the confounding factors in the design and/or analysis? 6a. Was the follow up of subjects complete enough? 6b. Was the follow up of subjects long enough? 9. Do you believe the results? 10. Can the results be applied to the local population? 11. Do the results of this study fit with other available evidence?

1  
2  
3  
4  
5  
6  
7  
8  
9  
10  
11  
12  
13  
14  
15  
16  
17  
18  
19  
20  
21  
22  
23  
24  
25  
26  
27  
28  
29  
30  
31  
32  
33  
34  
35  
36  
37  
38  
39  
40  
41  
42  
43  
44  
45  
46  
47

**Web Table 3. Prevalence of CVD by sexual orientation**

| Study name                   | Heterosexual        | Lesbian               | AOR (95%CI)          | Bisexual              | AOR (95%CI)         | SMW    | AOR (95%CI)          |
|------------------------------|---------------------|-----------------------|----------------------|-----------------------|---------------------|--------|----------------------|
| Blosnich 2014&               | 5.8%#<br>(SE 0.002) | 5.0%#<br>(SE 0.002)   | NR                   | 7.0%#<br>(SE 0.024)   | NR                  | NR     | NR                   |
| Boehmer 2014£                | 4.9%<br>(SE 0.11)   | 5.8%<br>(SE 1.30)     | 1.46 (0.92 to 2.34)  | 3.8%<br>(SE 0.75)     | 1.14 (0.75 to 1.72) | NR     | NR                   |
| Conron 2010&                 | 1.3%#<br>(SE 0.1)   | 1.8%#<br>(SE 0.6)     | 1.92 (0.95 to 3.87)  | 3.3%#<br>(SE 2.2)     | 2.24 (0.53 to 9.43) | NR     | NR                   |
| Fredriksen-Goldsen 2013&     | 10.7%#              | NR                    | NR                   | NR                    | NR                  | 10.5%# | 1.37 (1.00 to 1.86)* |
| Garland-Forshee 2014&        | 6.2%# (5.8 to 6.6)  | 4.0%#<br>(2.1 to 7.5) | 1.0 (0.5 to 1.9)     | 1.8%#<br>(0.6 to 6.0) | 0.7 (0.2 to 2.9)    | NR     | NR                   |
| Jackson 2016 (heart disease) | 10.8%               | 9.9%                  | 0.91 (0.61 to 1.35)  | 7.2%                  | 0.73 (0.40 to 1.35) | NR     | NR                   |
| Jackson 2016 (stroke)        | 3.2%                | 5.8%                  | 1.96 (1.14 to 3.39)* | 3.4%                  | 1.68 (0.71 to 3.97) | NR     | NR                   |
| Matthews 2014                | 4.1%                | NR                    | NR                   | NR                    | NR                  | 0.4%   | 0.19 (0.04 to 0.87)  |

\* - statistically significant to p<0.05 or less, # - weighted percentages, & - calculated from weighted percentages, £ - calculated from unweighted percentages, RR – relative risk.

**Web Table 4. Prevalence of hypertension (or hypertensive medication use) by sexual orientation**

| Study name                       | Heterosexual             | Lesbian                  | AOR (95%CI)         | Bisexual                | AOR (95%CI)         | SMW   | AOR (95%CI)                   |
|----------------------------------|--------------------------|--------------------------|---------------------|-------------------------|---------------------|-------|-------------------------------|
| Boehmer 2014                     | 21.2%<br>(SE 0.19)       | 19.0%<br>(SE 1.81)       | 0.99 (0.77 to 1.26) | 17.6%<br>(SE 1.70)      | 1.21 (0.95 to 1.53) | NR    | NR                            |
| Boehmer 2014<br>(medication use) | 65.3%<br>(SE 0.47)       | 66.0%<br>(SE 4.29)       | 1.57 (0.90 to 2.75) | 45.0%<br>(SE 4.69)      | 0.74 (0.44 to 1.24) | NR    | NR                            |
| Dilley 2010                      | 22.7%<br>(22.1 to 23.4)  | 14.7%<br>(9.8 to 21.4)   | 1.0 (0.6 to 1.7)    | 17.0%<br>(12.2 to 23.1) | 1.6 (1.1 to 2.5)*   | NR    | NR                            |
| Everett 2013&                    | 12.2%#<br>(SE 0.65)      | 10.3%#<br>(SE 3.21)      | NR                  | 11.4%#<br>(SE 1.19)     | NR                  | NR    | NR                            |
| Farmer 2013£<br>(medication use) | 14.7%                    | NR                       | NR                  | NR                      | NR                  | 11.6% | Not statistically significant |
| Garland-Forshee<br>2014          | 25.6%#<br>(24.3 to 26.8) | 22.9%#<br>(13.8 to 35.7) | 1.2 (0.6 to 2.4)    | 12.4%#<br>(7.5 to 19.9) | 0.9 (0.5 to 1.7)    | NR    | NR                            |
| Jackson 2016                     | 35.5%                    | 32.2%                    | 0.91 (0.74 to 1.12) | 32.1%                   | 0.96 (0.71 to 1.31) | NR    | NR                            |
| Matthews 2014                    | 33.2%                    | NR                       | NR                  | NR                      | NR                  | 22.0% | 1.00 (0.43 to 2.33)           |

\* - statistically significant to  $p < 0.05$  or less, # - weighted percentages, & - calculated from weighted percentages, £ - calculated from unweighted percentages, RR – relative risk.

1  
2  
3  
4  
5  
6  
7  
8  
9  
10  
11  
12  
13  
14  
15  
16  
17  
18  
19  
20  
21  
22  
23  
24  
25  
26  
27  
28  
29  
30  
31  
32  
33  
34  
35  
36  
37  
38  
39  
40  
41  
42  
43  
44  
45  
46  
47

**Web Table 5. Prevalence of any type of diabetes mellitus by sexual orientation**

| Study name           | Heterosexual         | Lesbian                | AOR (95%CI)         | Bisexual             | AOR (95%CI)         | SMW   | AOR (95%CI)                   |
|----------------------|----------------------|------------------------|---------------------|----------------------|---------------------|-------|-------------------------------|
| Blosnich 2014&       | 10.2%#<br>(SE 0.002) | 6.8%#<br>(SE 0.016)    | NR                  | 6.1%#<br>(SE 0.016)  | 0.75 (0.44 to 1.29) | NR    | NR                            |
| Boehmer 2014£        | 5.7%<br>(SE 0.12)    | 4.6%<br>(SE 0.74)      | 1.07 (0.76 to 1.50) | 4.2%                 | 1.10 (0.79 to 1.55) | NR    | NR                            |
| Clark 2015           | 6.0%                 | 1.9%                   | NR                  | 6.8%                 | NR                  | 7.2%  | NR                            |
| Conron 2010          | 3.9%<br>(SE 0.1)     | 3.8%<br>(SE 0.9)       | 1.23 (0.74 to 2.06) | 3.9%<br>(SE 1.1)     | 1.04 (0.62 to 1.76) | NR    | NR                            |
| Dilley 2010          | 6.3%<br>(6.0 to 6.5) | 5.1%<br>(3.3 to 7.7)   | 1.3 (0.8 to 2.0)    | 5.8%<br>(3.8 to 8.8) | 1.8 (1.1 to 2.8)*   | NR    | NR                            |
| Farmer 2013          | 5.3%                 | NR                     | NR                  | NR                   | NR                  | 6.4%  | Not statistically significant |
| Garland-Forshee 2014 | 6.5%<br>(6.1 to 6.8) | 10.8%<br>(4.1 to 26.0) | 2.2 (0.6 to 7.8)    | 2.4%<br>(1.2 to 5.0) | 0.8 (0.4 to 1.6)    | NR    | NR                            |
| Jackson 2016         | 10.7%                | 7.7%                   | 0.88 (0.58 to 1.34) | 7.1%                 | 0.63 (0.33 to 1.20) | NR    | NR                            |
| Matthews 2014        | 11.3%#               | NR                     | NR                  | NR                   | NR                  | 4.3%# | 0.55 (0.17 to 1.82)           |

\* - statistically significant to p<0.05 or less, # - weighted percentages, & - calculated from weighted percentages, £ - calculated from unweighted percentages, RR – relative risk.

Web Figure 1. PRISMA flow diagram

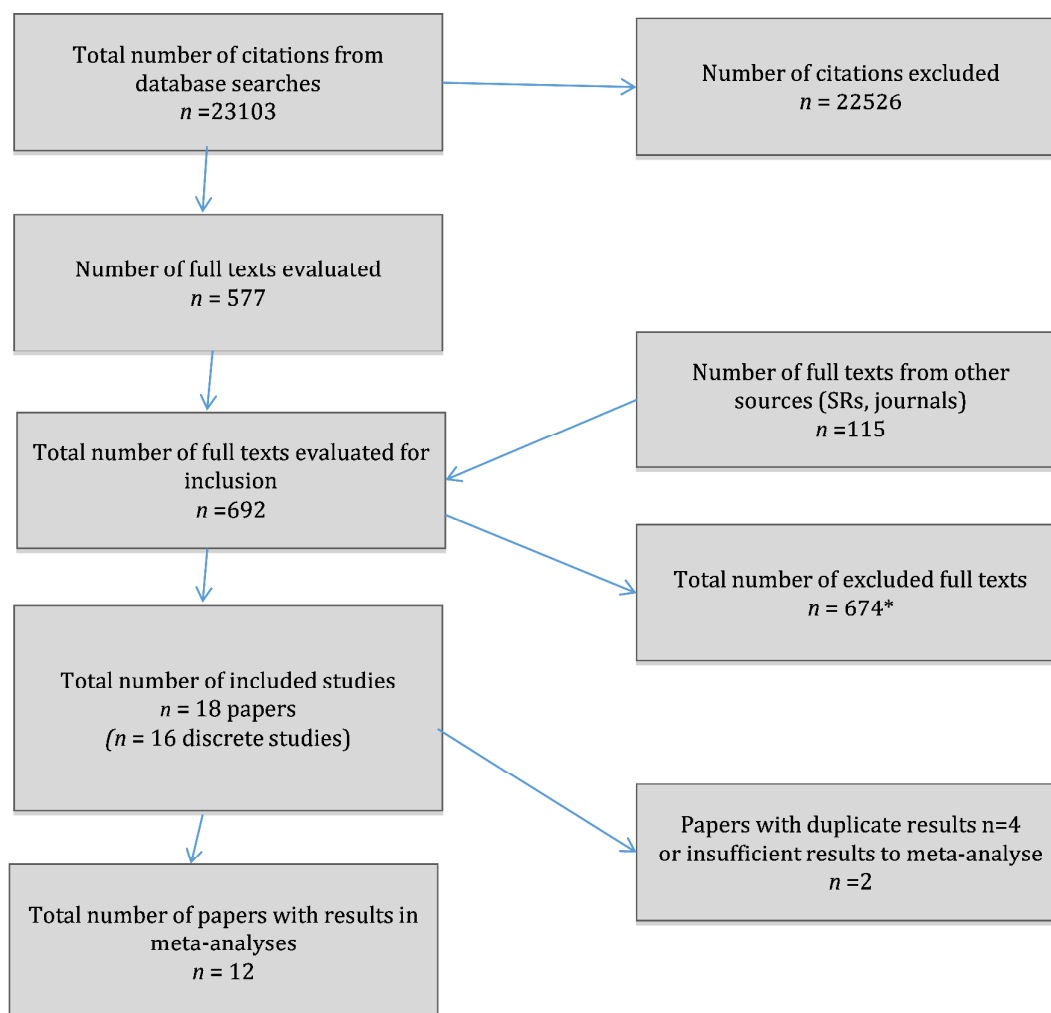

\* Reasons for 674 full text exclusions: case studies = 7, diagnostic studies = 8, experimental studies = 8, in children only = 7, no comparison with heterosexual women = 1, no relevant numerical outcomes = 94, pilot studies = 2, qualitative studies = 123, results in men and women combined only = 124, reviews/editorials = 74, surveys on wrong topic = 226.

Web Figure 2a. CVD in lesbians

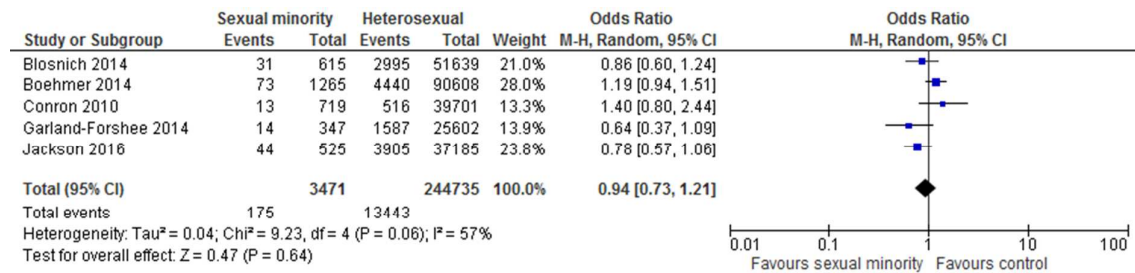

Web Figure 2b, CVD in bisexual women

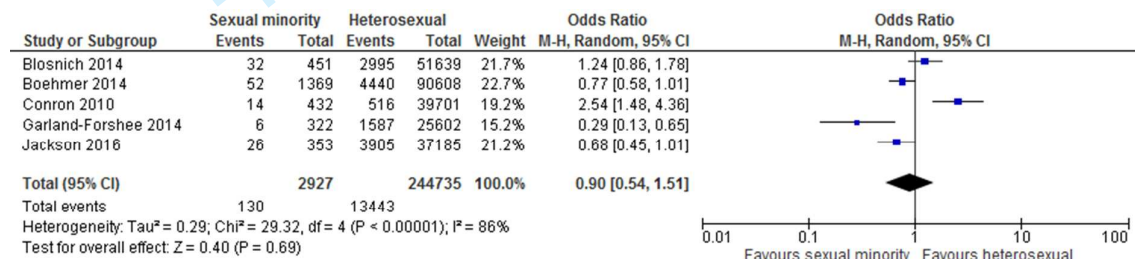

Web Figure 3a. Hypertension in lesbians

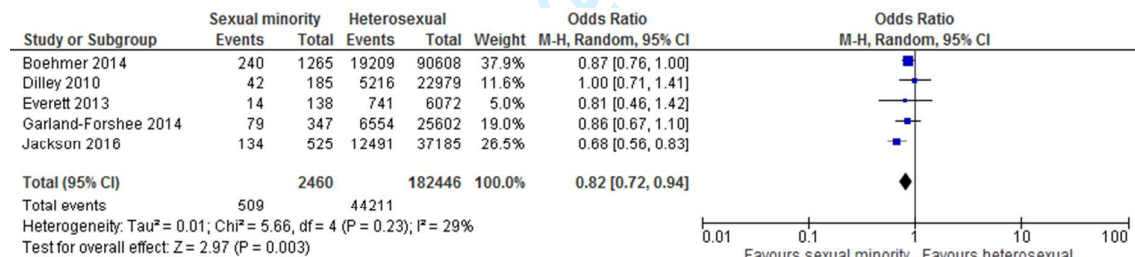

Web Figure 3b. Hypertension in bisexual women

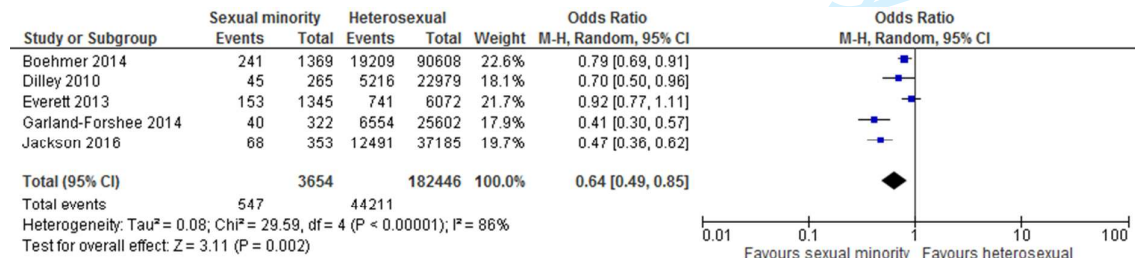

Web Figure 4a. Diabetes mellitus in lesbians

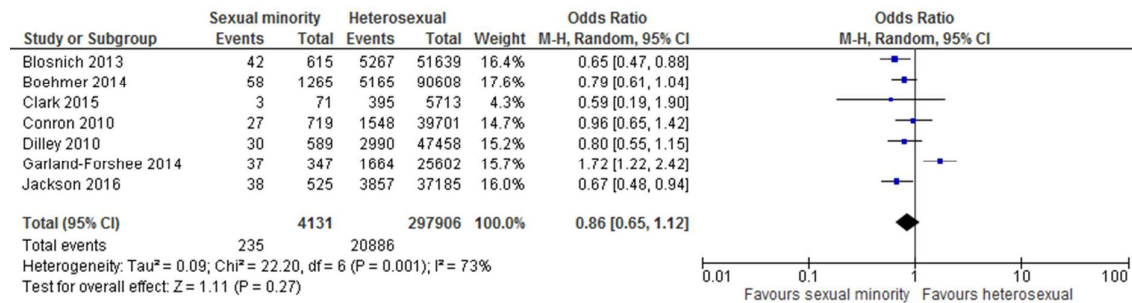

Web Figure 4b. Diabetes mellitus in bisexual women

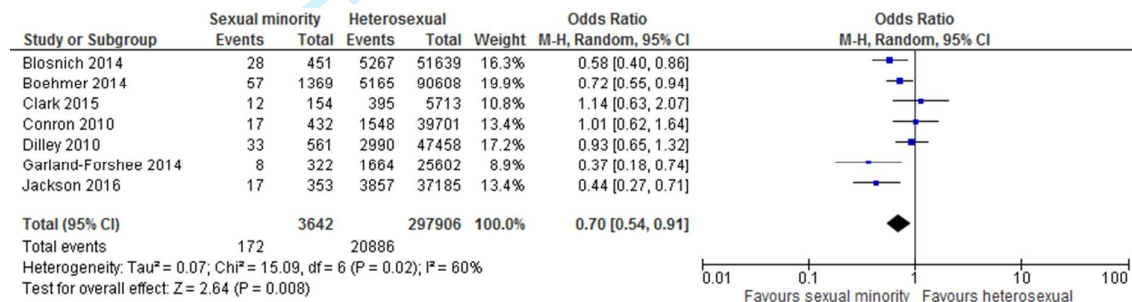



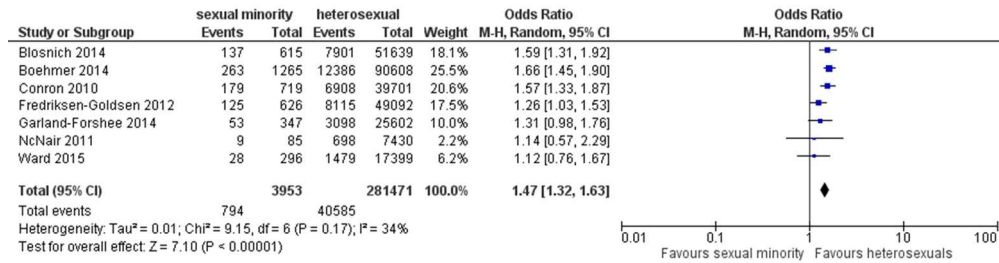

### Meta-analysis of asthma in lesbians

319x84mm (72 x 72 DPI)

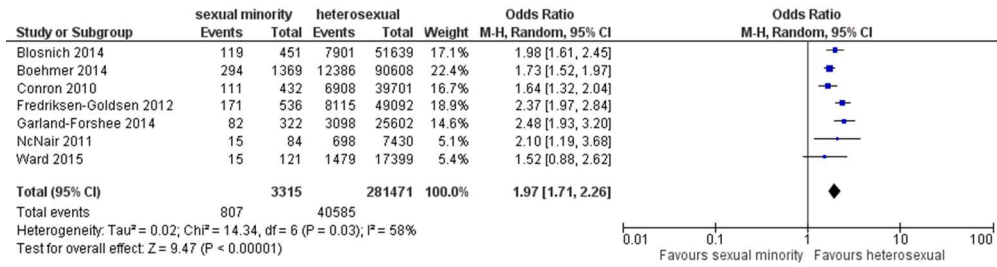

Meta-analysis of asthma in bisexual women

317x84mm (72 x 72 DPI)

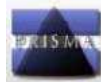

# PRISMA 2009 Checklist

| Section/topic                      | #  | Checklist item                                                                                                                                                                                                                                                                                              | Reported on page # |
|------------------------------------|----|-------------------------------------------------------------------------------------------------------------------------------------------------------------------------------------------------------------------------------------------------------------------------------------------------------------|--------------------|
| <b>TITLE</b>                       |    |                                                                                                                                                                                                                                                                                                             |                    |
| Title                              | 1  | Identify the report as a systematic review, meta-analysis, or both.                                                                                                                                                                                                                                         | 1                  |
| <b>ABSTRACT</b>                    |    |                                                                                                                                                                                                                                                                                                             |                    |
| Structured summary                 | 2  | Provide a structured summary including, as applicable: background; objectives; data sources; study eligibility criteria, participants, and interventions; study appraisal and synthesis methods; results; limitations; conclusions and implications of key findings; systematic review registration number. | 2                  |
| <b>INTRODUCTION</b>                |    |                                                                                                                                                                                                                                                                                                             |                    |
| Rationale                          | 3  | Describe the rationale for the review in the context of what is already known.                                                                                                                                                                                                                              | 4                  |
| Objectives                         | 4  | Provide an explicit statement of questions being addressed with reference to participants, interventions, comparisons, outcomes, and study design (PICOS).                                                                                                                                                  | 4                  |
| <b>METHODS</b>                     |    |                                                                                                                                                                                                                                                                                                             |                    |
| Protocol and registration          | 5  | Indicate if a review protocol exists, if and where it can be accessed (e.g., Web address), and, if available, provide registration information including registration number.                                                                                                                               | 4                  |
| Eligibility criteria               | 6  | Specify study characteristics (e.g., PICOS, length of follow-up) and report characteristics (e.g., years considered, language, publication status) used as criteria for eligibility, giving rationale.                                                                                                      | 4                  |
| Information sources                | 7  | Describe all information sources (e.g., databases with dates of coverage, contact with study authors to identify additional studies) in the search and date last searched.                                                                                                                                  | 4,5                |
| Search                             | 8  | Present full electronic search strategy for at least one database, including any limits used, such that it could be repeated.                                                                                                                                                                               | 4                  |
| Study selection                    | 9  | State the process for selecting studies (i.e., screening, eligibility, included in systematic review, and, if applicable, included in the meta-analysis).                                                                                                                                                   | 5                  |
| Data collection process            | 10 | Describe method of data extraction from reports (e.g., piloted forms, independently, in duplicate) and any processes for obtaining and confirming data from investigators.                                                                                                                                  | 5                  |
| Data items                         | 11 | List and define all variables for which data were sought (e.g., PICOS, funding sources) and any assumptions and simplifications made.                                                                                                                                                                       | 5                  |
| Risk of bias in individual studies | 12 | Describe methods used for assessing risk of bias of individual studies (including specification of whether this was done at the study or outcome level), and how this information is to be used in any data synthesis.                                                                                      | 5                  |
| Summary measures                   | 13 | State the principal summary measures (e.g., risk ratio, difference in means).                                                                                                                                                                                                                               | 5                  |
| Synthesis of results               | 14 | Describe the methods of handling data and combining results of studies, if done, including measures of consistency (e.g., $I^2$ ) for each meta-analysis.                                                                                                                                                   | 5                  |

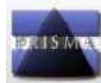

# PRISMA 2009 Checklist

Page 1 of 2

| Section/topic                 | #  | Checklist item                                                                                                                                                                                           | Reported on page # |
|-------------------------------|----|----------------------------------------------------------------------------------------------------------------------------------------------------------------------------------------------------------|--------------------|
| Risk of bias across studies   | 15 | Specify any assessment of risk of bias that may affect the cumulative evidence (e.g., publication bias, selective reporting within studies).                                                             | 5                  |
| Additional analyses           | 16 | Describe methods of additional analyses (e.g., sensitivity or subgroup analyses, meta-regression), if done, indicating which were pre-specified.                                                         | 5                  |
| <b>RESULTS</b>                |    |                                                                                                                                                                                                          |                    |
| Study selection               | 17 | Give numbers of studies screened, assessed for eligibility, and included in the review, with reasons for exclusions at each stage, ideally with a flow diagram.                                          | 5,32               |
| Study characteristics         | 18 | For each study, present characteristics for which data were extracted (e.g., study size, PICOS, follow-up period) and provide the citations.                                                             | 15-19              |
| Risk of bias within studies   | 19 | Present data on risk of bias of each study and, if available, any outcome level assessment (see item 12).                                                                                                | 27                 |
| Results of individual studies | 20 | For all outcomes considered (benefits or harms), present, for each study: (a) simple summary data for each intervention group (b) effect estimates and confidence intervals, ideally with a forest plot. | 5-7, 20, 29-31     |
| Synthesis of results          | 21 | Present results of each meta-analysis done, including confidence intervals and measures of consistency.                                                                                                  | 21,33,34           |
| Risk of bias across studies   | 22 | Present results of any assessment of risk of bias across studies (see Item 15).                                                                                                                          | See 5              |
| Additional analysis           | 23 | Give results of additional analyses, if done (e.g., sensitivity or subgroup analyses, meta-regression [see Item 16]).                                                                                    | n/a                |
| <b>DISCUSSION</b>             |    |                                                                                                                                                                                                          |                    |
| Summary of evidence           | 24 | Summarize the main findings including the strength of evidence for each main outcome; consider their relevance to key groups (e.g., healthcare providers, users, and policy makers).                     | 7                  |
| Limitations                   | 25 | Discuss limitations at study and outcome level (e.g., risk of bias), and at review-level (e.g., incomplete retrieval of identified research, reporting bias).                                            | 8,9                |
| Conclusions                   | 26 | Provide a general interpretation of the results in the context of other evidence, and implications for future research.                                                                                  | 9,10               |
| <b>FUNDING</b>                |    |                                                                                                                                                                                                          |                    |
| Funding                       | 27 | Describe sources of funding for the systematic review and other support (e.g., supply of data); role of funders for the systematic review.                                                               | 1                  |

From: Moher D, Liberati A, Tetzlaff J, Altman DG, The PRISMA Group (2009). Preferred Reporting Items for Systematic Reviews and Meta-Analyses: The PRISMA Statement. PLoS Med 6(7): e1000097. doi:10.1371/journal.pmed1000097

For more information, visit: [www.prisma-statement.org](http://www.prisma-statement.org).

Page 2 of 2

For peer review only - <http://bmjopen.bmj.com/site/about/guidelines.xhtml>

# BMJ Open

## A systematic review and meta-analysis of diabetes mellitus, cardiovascular and respiratory condition epidemiology in sexual minority women.

|                                 |                                                                                                                                                                                                                                                                                                                                                   |
|---------------------------------|---------------------------------------------------------------------------------------------------------------------------------------------------------------------------------------------------------------------------------------------------------------------------------------------------------------------------------------------------|
| Journal:                        | <i>BMJ Open</i>                                                                                                                                                                                                                                                                                                                                   |
| Manuscript ID                   | bmjopen-2017-020776.R1                                                                                                                                                                                                                                                                                                                            |
| Article Type:                   | Research                                                                                                                                                                                                                                                                                                                                          |
| Date Submitted by the Author:   | 25-Jan-2018                                                                                                                                                                                                                                                                                                                                       |
| Complete List of Authors:       | Meads, Catherine; Anglia Ruskin University, Faculty of Health, Social Care and Education<br>Martin, Adam; Academic Unit of Health Economics, Leeds Institute of Health Sciences<br>Grierson, Jeffrey; Anglia Ruskin University, Faculty of Health, Social Care and Education<br>Varney, Justin; Public Health England, Adult Health and Wellbeing |
| <b>Primary Subject Heading</b>: | Epidemiology                                                                                                                                                                                                                                                                                                                                      |
| Secondary Subject Heading:      | Respiratory medicine, Diabetes and endocrinology, Cardiovascular medicine                                                                                                                                                                                                                                                                         |
| Keywords:                       | systematic review, meta-analysis, sexual minority women, Cardiac Epidemiology < CARDIOLOGY, Epidemiology < THORACIC MEDICINE                                                                                                                                                                                                                      |
|                                 |                                                                                                                                                                                                                                                                                                                                                   |

SCHOLARONE™  
Manuscripts

Only

1  
2  
3 Title: A systematic review and meta-analysis of diabetes mellitus, cardiovascular and respiratory  
4 condition epidemiology in sexual minority women.  
5

6  
7 Authors: Catherine Meads<sup>1</sup>, Adam Martin<sup>2</sup>, Jeffrey Grierson<sup>1</sup>, Justin Varney<sup>3</sup>  
8

9 Corresponding author: C Meads – email: catherine.meads@anglia.ac.uk  
10

11 1. Faculty of Health, Social Care and Education, Anglia Ruskin University, Cambridge, UK  
12

13 2. Academic Unit of Health Economics, Leeds Institute of Health Sciences, University of Leeds, Leeds,  
14 UK

15 3. Public Health England  
16  
17

18  
19 Acknowledgements: Professor Richard Riley for advice on conducting meta-analyses of adjusted  
20 odds ratios, Dr Brendon Stubbs for conducting the meta-analyses of adjusted odds ratios.  
21  
22

23  
24 Conflicts of interest: none  
25

26 Funding: Public Health England grant (£30,000) to RAND Europe for writing the full WSW best  
27 evidence review. The funder did not influence the conduct of the review.  
28

29 Word count: 3982  
30

31 Data sharing statement: No additional unpublished data as systematic review  
32

33 Contributorship statement: Justin Varney and Catherine Meads developed the research question.  
34 Catherine Meads and Adam Martin conducted the systematic review (searches, citation selection,  
35 data extraction, quality assessment). Catherine Meads wrote the systematic review and all data was  
36 checked by Adam Martin and Jeffrey Grierson. Catherine Meads conducted the meta-analysis,  
37 checked by Adam Martin. All authors edited the manuscript.  
38  
39  
40  
41  
42  
43  
44  
45  
46  
47  
48  
49  
50  
51  
52  
53  
54  
55  
56  
57  
58  
59  
60

## Abstract

### Objectives

Sexual minority women (SMW) experience higher chronic-disease risk-factors than heterosexual counterparts. However, it was unclear if these risks translate into higher physical-condition rates. This systematic review evaluates cardiovascular disease (CVD), hypertension, respiratory disease and diabetes mellitus in SMW.

### Methods

Prospero database registration: CRD42016050299. Included were studies reporting mortality, incidence or prevalence of the above listed conditions in SMW compared to heterosexual women. Databases (platforms) searched from 2010 to December 2016 were Medline (OVID), Embase (Elsevier), Cinahl (Elsevier), PsycInfo (Ovid), Social Policy and Practice (Ovid), Cochrane CENTRAL (Cochrane Library), Science Citation Index (Web of Science), CAB abstracts (Ovid). Search terms included MeSH terms and text words. Extensive additional searches were conducted in specialist academic journals and websites.

Two reviewers checked study eligibility. One independently extracted data and assessed quality, checked by a second, with disagreements resolved through discussion. The CASP cohort checklist was used to assess risk-of-bias. Meta-analysis was conducted where more than four studies reported same outcomes, with Comprehensive Meta-analysis software using adjusted odds ratios (AORs) and random-effects models. Heterogeneity was assessed using  $I^2$  test.

### Results

Identified were 23,103 citations, 692 full-texts screened, and 16 studies included (in 18 papers). One reported mortality (from Denmark), none incidence and 15 prevalence (14 USA, 1 Australia). Same-sex-cohabiting women had higher mortality rates compared to opposite-sex-cohabiting women in CVD (Hazard Ratio (HR)=1.37 (95%CI=1.22-1.54) and respiratory disease (HR=2.10 (95%CI=1.74-2.53). AOR meta-analyses of seven studies showed higher asthma rates in lesbians (OR=1.44 (95%CI=1.27-1.64) $I^2=0%$ ) and bisexual women (OR=1.64 (95%CI=1.41-1.89) $I^2=0%$ ) but no differences for CVD (five studies), hypertension (five studies) or diabetes mellitus (seven studies).

### Conclusions

These new health estimates require further confirmatory epidemiological studies, and investigation into potential environmental, hormonal, physiological, psychological or genetic causes. This would be supported by routine collection of sexual-identity measures in population-level epidemiological surveys.

### Strengths and limitations of this study

- A major strength is that this is the first numerical estimate of the relative prevalence of diabetes mellitus, cardiovascular and respiratory diseases in lesbians and bisexual women.
- We used extensive searches from a number of different sources, not just electronic databases and reference lists but also in specialist academic journals and websites to ensure we found all relevant studies.
- We used a wide definition of SMW to include identity, behaviour and partnership to be able to include all SMW irrespective of being sexually active or in a partnership. This will widen the generalizability of the systematic review.
- Considerable efforts were made to avoid double counting of participants from different studies when entering data but some double-counting may have occurred due to the nature of the surveys used in the studies.
- We used adjusted odds ratios to meta-analyse, which means that the results were more comparable than using unadjusted prevalence estimates. However, none of the AORs were adjusted for smoking status, which is a limitation of the included studies.



## Background

Sexual minority women (SMW) include lesbians, bisexual women, women who have sex with women, women who have sex with men and women, and women who are married to or cohabit with another woman in a committed relationship. Public Health England estimates that at least 2.5% of the population identify as lesbian, gay or bisexual<sup>1</sup>.

Chronic disease risk factors include poor diet, lack of exercise, obesity, smoking, excessive alcohol intake, anxiety, depression, hypertension and high cholesterol levels<sup>2,3,4</sup>. In general, SMW populations experience disproportionate behavioural risks to health and higher chronic disease risk factors than their heterosexual counterparts<sup>5,6</sup>. Due to a lack of research so far<sup>6</sup>, it is unclear whether these risk factors translate into higher rates of physical health conditions.

Past research has highlighted some aspects of health inequalities experienced by SMW but also identified significant and persistent gaps in the evidence<sup>5,7-10</sup> including in relation to common physical conditions such as cardiovascular disease (CVD), respiratory tract disease and diabetes mellitus. These are some of the leading causes of death and disability for women<sup>11</sup> and, up to now, there have been no published summary estimates of the relative prevalence of these conditions in SMW compared to heterosexual women.

There have been two recent systematic reviews of physical health in SMW<sup>12,13</sup>. Eliason (2015)<sup>12</sup> reviewed evidence on prevalence and risk of a variety of conditions and Simoni et al (2016)<sup>13</sup> investigated disparities in physical health conditions in SMW. Since these systematic reviews were conducted, more prevalence studies have been published. This systematic review includes all relevant recent evidence (published from 2010 onwards) on the mortality, incidence and prevalence of specific physical health conditions of CVD, hypertension, respiratory disease and diabetes mellitus in SMW compared to heterosexual women, and conducts meta-analyses in order to derive up-to-date prevalence estimates of these conditions and determine whether there are different rates in SMW compared to heterosexual women.

## Methods

A protocol was registered with the Prospero database (No. CRD42016050299) for research investigating all aspects of health and experience of healthcare in SMW, of which this project is part. The inclusion criteria for this systematic review were any published comparative studies in any language, published from 2010 onwards, comparing specific rates (see below) in SMW (any definition including identity, behaviour or cohabitation status) of any age compared to heterosexual women (any definition including identity, behaviour or cohabitation status) of any age in any country or setting. The following self-report or objectively measured rates were included: mortality, incidence and prevalence of CVD, hypertension, diabetes mellitus (any type) and respiratory diseases including asthma.

### Searches:

Database searches were conducted in two phases. First, searches were conducted by Public Health England Knowledge and Library Service in May 2015. Second, searches were conducted by the first author (CM) in December 2016 with dates from January 2015 to December 2016. Databases (platforms) searched were Medline (OVID), Embase (Elsevier), Cinahl (Elsevier), PsycINFO (Ovid), Social Policy and Practice (Ovid), Cochrane CENTRAL (Cochrane Library), Science Citation Index (Web of Science), CAB abstracts (Ovid). EPPI-Reviewer 4, Endnote and Microsoft Excel were used to sift

1  
2  
3 citations. Search terms included MeSH terms and text words for sexual minority (for example,  
4 lesbian, bisexual, homosexual, WSW, WSMW, same sex). We then searched a large number of full  
5 texts for the physical conditions listed above. Searches were not limited to English language.  
6 Example search strategies for 4 databases from the December 2016 searches are in Web  
7 Supplement 1.  
8

9 In addition to database searches, reviews and summaries of lesbian, gay, bisexual & transgender  
10 (LGB&T) health were examined for relevant evidence. LGB&T Health Research Journal (all issues),  
11 Journal of Lesbian Studies (2014-16) and Journal of Gay and Lesbian Mental Health (2014-16) were  
12 searched. Previous projects by the first author (CM) were searched for relevant evidence and, from a  
13 previous project, a list of currently active researchers in LGBT health with their publications were  
14 reviewed. Web pages of several researchers known to be active in SMW research were searched.  
15 The UK National LGB&T Partnership monthly newsletter from February to October 2016 was sifted  
16 for relevant up-to-date work that had not yet been published. UK national survey websites were also  
17 sifted for information on sexual identity and health (Integrated Household Survey, Scottish Health  
18 Survey, Welsh Health Survey and Health Survey for England).  
19  
20  
21

## 22 Study selection, data extraction, quality assessment and synthesis

  
23

24 Full text copies of references matching inclusion criteria were obtained. Two reviewers (CM and AM)  
25 checked study eligibility. One independently extracted data from studies into the report (CM) and  
26 these were checked by another reviewer (JG), with disagreements resolved through discussion.  
27 Characteristics and results of all included studies were described through narrative synthesis.  
28 Tabulation was used where there was more than one study reporting the same outcome. Where  
29 there was overlap in study populations, the largest included population was used where outcomes  
30 of interest were reported. The Critical Appraisal Skills Programme (CASP) checklist for cohort studies  
31 was used to assess quality for all studies. Since there is no established and validated quality checklist  
32 specifically for cross-sectional surveys, using the same checklist for all provided consistency in  
33 quality assessment across studies. Meta-analysis was conducted where there were four or more  
34 discrete studies reporting the same outcome. This included both unadjusted prevalence estimates  
35 (with Review Manager software 5.3), and adjusted odds ratios using inverse variance (with  
36 Comprehensive Meta-analysis version 3). Random effects models were used for both. Statistical  
37 heterogeneity was assessed using the  $I^2$  test, using standard thresholds for high, medium and low  
38 heterogeneity<sup>14</sup>. There were insufficient studies reporting the same outcomes to be able to  
39 construct a meaningful funnel plot to assess publication bias.  
40  
41  
42

## 43 Results

### 44 Description of studies

45 A total of 23,103 citations were identified, 22,763 from the first searches and 340 from the second  
46 searches (see Web Figure 1). Full texts of 692 papers were screened for potential relevancy. Sixteen  
47 studies were included<sup>15-30</sup>, described in 18 papers - the study by Clark et al (2015)<sup>31</sup> contained a  
48 subset of the participants in the study by Everett et al (2013)<sup>20</sup> and the study by Wallace (2011)<sup>32</sup>  
49 contained a subset of those in the study by Boehmer et al (2014)<sup>17</sup>. For characteristics of included  
50 studies, see Table 1 and for participant baseline characteristics, see Web Appendix Table 1.  
51  
52

53 One study examined mortality rates; Frisch and Simonsen (2013)<sup>24</sup> reported hazard ratios for  
54 mortality by sexual orientation in a large national cohort from Denmark by various causes of death  
55 (n=6.5 million, approximately 50% women).  
56  
57

No studies investigated incidence, and 15 studies investigated prevalence<sup>13-23, 25-30</sup>. Two were based on single waves of cohort studies (Everett et al 2013<sup>20</sup> (also reported in Clarke et al 2015<sup>31</sup>), and McNair et al 2011<sup>29</sup>). The first<sup>20</sup> was based in the USA and used Wave IV of data from the National Longitudinal Study of Adolescent Health. The second<sup>29</sup> used one year's data from an Australian study of young women aged 18-23 selected at random from the Australian Medicare database. The remaining 13 studies were from the USA and used one or more year's data from repeated cross sectional surveys. Eight of these used Behavioral Risk Factor Surveillance System (BRFSS) surveys, either using a national sample from different years<sup>15,16</sup> or for specific states (Massachusetts<sup>18</sup>, Oregon<sup>25</sup>, North Carolina<sup>28</sup>, Washington State<sup>19,22,23</sup>). Other surveys used included; The National Health Interview Survey<sup>26,30</sup>, The California Health Interview Survey<sup>17,32</sup>, The Youth Risk Behaviour Surveillance System<sup>27</sup>, The National Health and Nutrition Examination Survey<sup>21</sup>.

One group of studies<sup>19,22,23</sup> reported different outcomes for different subsets (such as age ranges) of the same repeated survey for different years. Ward et al (2015)<sup>30</sup> investigated a subset of the population in Jackson et al (2016)<sup>26</sup> but Ward et al (2015)<sup>30</sup> reported asthma whereas Jackson et al (2016)<sup>26</sup> did not so both papers for this study have been included. Wallace et al (2011)<sup>32</sup> used a subset of the sample in Boehmer et al (2014)<sup>17</sup> and reported the same outcomes so these results are not reported here. Everett et al (2013)<sup>20</sup> and Clark et al (2015)<sup>31</sup> reported different outcomes from the same population so both papers for this study have been included.

Quality assessment found similar quality issues across studies, and are reported in Web Appendix Table 2. The cohort studies<sup>20,29</sup> reported results as if they were cross-sectional surveys by not using follow-up data. The main quality issues were that health conditions were ascertained mostly by health self-report; the main exception was in Everett et al 2013 (and Clark et al 2015)<sup>20,31</sup> where interviewers measured blood pressure. Also, weighted prevalence percentages were reported in several included studies (see Web Appendix Table 1), but weighting factors used were often unclear.

### Main findings

For CVD mortality and for respiratory tract disease mortality, Frisch and Simonsen (2013)<sup>24</sup> found that same-sex cohabiting women had higher mortality rates to opposite sex cohabiting women for these diseases (HR 1.37 (95%CI 1.22 to 1.54) and HR 2.10 (95%CI 1.74 to 2.53) respectively) but that same-sex married women had similar mortality rates to opposite sex married women (HR 1.32 (95%CI 0.75 to 2.33) and HR 0.85 (95%CI 0.36 to 2.05) respectively). The sample sizes were larger for same-sex cohabiting women (n=207 and n=111) than same sex married women (n=12 and n=5) and no conclusions can be drawn from the same sex married women data as sample sizes were too small.

Numerical prevalence results are presented in Table 2 (asthma), Web Appendix Table 3 (CVD), Web Appendix Table 4 (hypertension), and Web Appendix Table 5 (diabetes mellitus). They demonstrate that the way these rates were reported varied across the studies, for example some studies presented results for SMW compared to heterosexual women whereas others presented results separately for lesbians and for bisexual women. Percentages of women with conditions varied across the studies, most notably hypertension which varied from 14.7%<sup>21</sup> to 65.3%<sup>17</sup> in heterosexual women. Most studies presented AORs as well as the adjusted or unadjusted percentages but fewer gave measures of spread such as 95% CIs or standard errors (SEs). One study<sup>26</sup> presented results for heart disease and stroke separately and found no difference in rates between any of the groups (see Web Appendix Table 3). One study<sup>30</sup> presented results for chronic obstructive pulmonary disease which found higher rates in bisexual women compared to heterosexual women but not for lesbians

(prevalence in lesbians 6.0% (95%CI 3.2 to 11.0), bisexual women 13.6% (95%CI 6.9 to 25.2), heterosexual women 6.4% (95%CI 5.9 to 6.8).

## Meta-analysis

There were sufficient studies (i.e.  $n > 4$ ) presenting results for CVD, hypertension, asthma and diabetes (any type) in lesbians and in bisexual women for meta-analyses to be conducted.

Meta-analyses of unadjusted prevalence (see figure 1, Web Appendix 2a, 2b, 3a, 3b, 4a, 4b) showed no difference in CVD (lesbian OR=0.94 (95%CI 0.73 to 1.21) and bisexual women OR=0.90 (95%CI 0.54 to 1.51)) but lower prevalence of hypertension (lesbian OR=0.82 (95%CI 0.72 to 0.94) and bisexual women OR=0.64 (95%CI 0.49 to 0.85)). There was higher prevalence of asthma (lesbians OR=1.47 (95%CI 1.32 to 1.63) and bisexual women OR=1.97 (95%CI 1.71 to 2.26) and combined for all SMW OR=1.68 (95%CI 1.52 to 1.85)). For diabetes mellitus there was no difference in prevalence between lesbians and heterosexual women but lower prevalence in bisexual women (OR=0.86 (95%CI 0.65 to 1.12) and OR=0.70 (95%CI 0.54 to 0.91)).

Meta-analyses of adjusted odds ratios showed increased rates of asthma in lesbians and in bisexual women compared to heterosexual women (ORs = 1.44 (95%CI 1.27 to 1.64)  $I^2=0\%$  and 1.64 (95%CI 1.41 to 1.89)  $I^2=0\%$ ). They showed no differences for lesbians or bisexual women compared to heterosexual women for CVD (ORs = 1.34 (95%CI 0.97 to 1.85)  $I^2=45\%$  and 1.08 (95%CI 0.80 to 1.47)  $I^2=0\%$ ), for hypertension (ORs = 0.98 (95%CI 0.86 to 1.14)  $I^2=0\%$  and 1.08 (95%CI 0.86 to 1.35)  $I^2=39\%$ ), and for diabetes mellitus (ORs = 1.11 (95%CI 0.91 to 1.36)  $I^2=0\%$  and 1.01 (95%CI 0.75 to 1.36)  $I^2=51\%$ ).

## Discussion

### Summary of main findings

Results from a single large study reporting mortality rates<sup>24</sup> showed that there was no difference in cardiovascular or respiratory tract disease mortality rates in same-sex married compared to opposite sex married women, but higher mortality rates in same-sex cohabiting women compared to opposite sex cohabiting women.

Meta-analyses of adjusted odds ratios of disease prevalence showed no differences in CVD, hypertension or diabetes mellitus prevalence, but a higher prevalence of asthma in SMW compared to heterosexual women.

### Discussion of main findings

A key finding was the higher prevalence, from the adjusted odds ratio meta-analysis, of asthma in lesbians and bisexual women. Asthma is caused by a mixture of genetic and environmental factors. Higher rates are associated with anxiety but it is not known if asthma causes psychological problems or if psychological problems lead to asthma<sup>33</sup>. Nevertheless, studies have shown higher rates of mental health problems including anxiety in SMW<sup>34,35</sup>. Asthma is also more common amongst those who are economically disadvantaged, and a consistent finding in studies included in the systematic review was that SMW had below average incomes<sup>15-17,21,29</sup>. Asthma is also more common amongst current or former smokers. Several included studies showed higher rates of smoking or tobacco use amongst SMW<sup>15,16,19-21,23,25,26,28</sup>. However, only one of the studies reporting asthma prevalence clearly controlled for smoking behaviour<sup>15</sup>.

The finding of lower hypertension prevalence and no difference in the adjusted odds ratio meta-analysis in lesbians and bisexual women was unexpected. Higher rates of hypertension are

1  
2  
3 associated with lack of exercise and obesity. Several of the included studies demonstrated higher  
4 rates of obesity<sup>15-18,20-22,25,26</sup> and a recent systematic review on obesity in SMW<sup>36</sup> also found  
5 consistently higher rates of obesity amongst SMW compared to heterosexual women. However, the  
6 rates of physical exercise in SMW is less clear. Two of the included studies showed higher rates of  
7 physical activity or exercise in lesbians and bisexual women compared to heterosexual women<sup>16,28</sup>  
8 whilst four showed no differences<sup>20,22,25,26</sup>. Hypertension is also associated with mental health  
9 difficulties, particularly depression<sup>37</sup>, and there are higher rates of depression in SMW<sup>34,35</sup>.

11 No difference in rates of diabetes mellitus were found in the meta-analysis of adjusted odds ratios,  
12 but in the unadjusted prevalence meta-analysis higher rates were found in bisexual women but not  
13 lesbians. It is unclear as to why this would occur. Risk factors for type II diabetes mellitus include  
14 hypertension, overweight/obesity, physical inactivity and unhealthy diet. Evidence on the first three  
15 are discussed above, however there is much less information available about diet. Dilley et al 2010<sup>19</sup>  
16 reported that the proportion eating insufficient fruits and vegetables was higher in bisexual women  
17 than lesbians and heterosexual women but Garland-Forshee et al 2014<sup>25</sup> showed no differences  
18 between lesbians, bisexual and heterosexual women in the proportion who met US CDC  
19 recommendations on fruit and vegetable intake.

22 Three of the included studies calculated that lesbians and bisexual women were at higher risk of  
23 CVD<sup>18,21,31</sup>. Farmer et al (2013)<sup>21</sup> and Clark et al (2015)<sup>31</sup> calculated risk scores using the Framingham  
24 General CVD Risk Score and both calculated that SMW had higher CVD risk scores. Farmer et al  
25 (2013)<sup>21</sup> calculated that SMW were 13.9% (95%CI 8.55 to 19.3%) older in vascular terms than their  
26 chronological age, and that this was 5.7% (95%CI 1.5% to 9.8%) greater than heterosexual women.  
27 Clark et al (2015)<sup>31</sup> found that average 30 year CVD risk was raised in all sexual minority groups of  
28 women, significantly so in mostly heterosexual and mostly homosexual women. Conron et al  
29 (2010)<sup>18</sup> also calculated CVD risk, using presence of obesity and smoking plus one other risk factor  
30 including lack of moderate physical activity, lifetime diabetes mellitus, hypertension and high  
31 cholesterol. They estimated that lesbians and bisexual women were at higher risk of CVD than  
32 heterosexual women.

35 It is known that there are higher rates of several CVD risk factors in SMW, including  
36 overweight/obesity, diabetes mellitus, tobacco use (all discussed above) high cholesterol and  
37 harmful use of alcohol (discussed below). Hence the finding of no difference in CVD rates was  
38 surprising. Also, since the systematic review found higher rates of asthma, if this was due to higher  
39 rates of smoking, it would be expected that there would be correspondingly higher rates of CVD.

41 Several of the included studies reported higher rates of harmful alcohol use in lesbians and bisexual  
42 women compared to heterosexuals<sup>16,19-21,23,25,26</sup>. Several also reported cholesterol levels - one found  
43 lower cholesterol levels in lesbians and bisexual women<sup>20</sup> but most found no significant  
44 differences<sup>19,23,25</sup>. Matthews et al, 2014<sup>28</sup> found that twice as many lesbians and bisexual women  
45 than heterosexual women were not having their cholesterol checked (32.5% vs 13.8%), but the  
46 implications of this are unclear.

#### 49 **Strengths and weaknesses of the study**

51 The strengths of the current systematic review include extensive searches from a number of  
52 different sources. We used a wide definition of SMW to include identity, behaviour and partnership.  
53 It is acknowledged that these are different concepts and women can identify as lesbian or bisexual  
54 without being sexually active or being in a partnership. Also some women identify as lesbian whilst  
55 having sex with men and some women identify as heterosexual whilst having sex with women. Most  
56  
57

of the studies also used self-report for the physical conditions, and this may result in responder bias, but it is unclear why responder bias might be stronger in SMW than heterosexual respondents. Also, almost all of the included studies were conducted in USA, so results may not be generalizable to other countries. Also, it is known that SMW have less insurance coverage and poorer access to healthcare in USA<sup>38</sup>. The precise questions on health used in the BRFSS questionnaires asked whether the respondent had been 'told by a health care professional' that they had had the named condition. If SMW have less access to healthcare, it could be assumed that fewer would have been told they had one of the conditions investigated here. So it is possible that all of the rates may have been underestimated, and the increased rates of asthma may be even higher than found here. In the reported results, prevalence of physical conditions were weighted to better reflect the underlying population in some of the included studies but not in others. Where the sexual minority samples were younger than the heterosexual population with which they were compared, it might be expected that the lack of weighting by age would result in underestimation of the difference in prevalence of physical health conditions, particularly CVD, hypertension and diabetes mellitus where prevalence rises by age. There were insufficient studies to be able to conduct meaningful subgroup analyses by whether or not the study had controlled for age. Furthermore, two of the studies<sup>16,23</sup> were unclear as to whether they weighted the reported prevalence or whether the reported weighting factors referred to the adjusted odds ratios that they also report. Some of the studies weighted by factors such as education and income which may also impact on the estimated prevalence of physical conditions. Some important factors were often not controlled for, e.g. for asthma, it would be usual to include smoking rates, which differ between SMW and heterosexual female populations. A further major limitation is that almost all of the prevalence research was from USA so it is currently unclear if the findings are generalizable to other countries.

In the meta-analyses, considerable efforts were made to avoid double counting of participants from different studies when entering data and hence some studies were excluded for one or more reported outcomes<sup>19,23,31,32</sup>. Random effects models were used because of clinical heterogeneity of the study samples. The heterogeneity between studies in the weightings that were used for the prevalence estimates in the unadjusted meta-analyses may have introduced some bias from this loss of information about differences between the two groups. Hence there may be some inconsistency between the AORs reported in the results tables and the ORs used in the meta-analysis. The meta-analyses of AORs mitigates some of these effects. However, in both types of meta-analyses, there was heterogeneity in outcome measures (e.g. one study measured hypertension, six using self-report hypertension and one study using hypertensive medication use), although we do not expect that this impacted on the observed differences between groups, our main outcome of interest.

### **Strengths and weaknesses in relation to previous research**

The previous systematic reviews<sup>12,13</sup> found fewer studies and did not conduct meta-analyses so did not quantify the physical health disparities they had found. For CVD prevalence Eliason (2014)<sup>12</sup> included seven studies, of which four were published before 2010, and for hypertension it included 12 studies, of which four were published before 2010. For asthma it included 13 studies, four of which were published before 2010. Some relevant results from included studies were not described, and the study by Garland-Forshee et al 2014<sup>24</sup> was omitted. Eliason (2014)<sup>12</sup> concluded that asthma was more common in SMW, but no differences were consistently found in the other chronic physical conditions she investigated, including diabetes, hypertension and CVD. Simoni et al (2016)<sup>13</sup> had a very brief summary of results. For CVD it found one study, for hypertension one study and for asthma four studies. All of these were included in the systematic review by Eliason (2015)<sup>12</sup>. Simoni et al (2016)<sup>13</sup> found evidence of disparities in the one included study reporting CVD<sup>22</sup> and in asthma,

1  
2  
3 but that evidence was lacking in diabetes and hypertension. There is also little information on the  
4 prevalence of these conditions in men according to sexual orientation and no relevant systematic  
5 reviews<sup>10</sup>.  
6

### 7 **Implications for clinicians and policy-makers**

8  
9 If there are higher rates of asthma in lesbians and bisexual women, this might have implications for  
10 health service delivery, particularly in primary care. Urwin and Whittaker (2016)<sup>39</sup> published an  
11 evaluation of the English General Practice Patient Survey (n=2,807,320 in total, 1,556,909 women)  
12 looking at inequalities of GP use by sexual orientation for various conditions. They found that  
13 lesbians but not bisexual women were less likely to visit the GP than heterosexual women in the  
14 previous 3 months for asthma or long-term chest problem (adjusted OR=0.84 (95%CI 0.71 to 0.98  
15 and OR=0.85 (95%CI 0.69 to 1.04)). So it is likely that SMW, particularly in the UK and possibly  
16 elsewhere, are not accessing services despite ill-health. A recent systematic review found that sexual  
17 minority populations generally have difficulties with access to health services for a variety of reasons  
18 including communication difficulties, internalized homophobia, prejudicial conduct adopted by  
19 health professionals, breach of confidentiality during consultations and institutional homophobia<sup>40</sup>.  
20 Combined with the evidence shown in this systematic review, this suggests potentially considerable  
21 latent demand for primary care services amongst SMW and that there may be particular issues for  
22 lesbians accessing primary health care services for asthma. This evidence contributes to a bigger  
23 picture about inequality for SMW in a wide range of aspects<sup>5,8</sup>.  
24  
25

26 This systematic review highlights the need for better routine data collection on sexual minority  
27 women as much of the current research has small sample sizes and based on countries with  
28 significantly different healthcare access and social norms around sexual identity. The introduction of  
29 an NHS information standard on sexual orientation in April 2017<sup>41</sup> will start to introduce routine data  
30 capture across hospital episode statistics and disease registries, alongside training across the NHS to  
31 support staff having positive conversations about sexual orientation, which will build over time a  
32 much clearer picture of the health inequalities in this group and potentially help to reduce them.  
33  
34

### 35 **Implications for research**

36  
37 This rigorously conducted systematic review has reported some important new findings on health  
38 inequalities in SMW that are hard to explain. Further research would be useful on these health  
39 inequalities, including their causes. This would be supported by the routine collection of sexual  
40 identity measures in population-level epidemiological studies, and the results published. Robust  
41 multi-level modelling (including sexual identity) should be conducted with large databases and  
42 cohort studies. For asthma, results from large cohort studies, controlled for risk factors such as  
43 smoking and overweight/obesity would be useful to further examine these findings. Regarding  
44 hypertension and CVD, the findings are also unexpected so investigation into potential causes would  
45 be very useful, such as possible differences in hormone levels, or other environmental, social,  
46 physiological, psychological or genetic factors that might be contributing to these results.  
47  
48  
49  
50  
51  
52  
53  
54  
55  
56  
57  
58  
59  
60

## References

1. Public Health England. Producing modelled estimates of the size of the lesbian, gay and bisexual (LGB) population of England. 2016  
[https://www.gov.uk/government/uploads/system/uploads/attachment\\_data/file/585349/PE\\_Final\\_report\\_FINAL\\_DRAFT\\_14.12.2016NB230117v2.pdf](https://www.gov.uk/government/uploads/system/uploads/attachment_data/file/585349/PE_Final_report_FINAL_DRAFT_14.12.2016NB230117v2.pdf)
2. Newton JN, Briggs AD, Murray CJ, Dicker D, Foreman KJ, Wang H, Met al. Changes in health in England, with analysis by English regions and areas of deprivation, 1990–2013: a systematic analysis for the Global Burden of Disease Study 2013. *Lancet* 2015; 386: 2257–74
3. Bhattacharya R, Shen C, Sambamoorthi U. Excess risk of chronic physical conditions associated with depression and anxiety. *BMC Psychiatry* 2014, 14:10
4. Clarke DM, Currie KC. Depression, anxiety and their relationship with chronic diseases: a review of the epidemiology, risk and treatment evidence. *Medical Journal of Australia* 2009;190(7 Supp):S54-S60.
5. Committee on Lesbian, Gay, Bisexual and Transgender Health Issues and Research Gaps and Opportunities. The health of lesbian, gay, bisexual and transgender (LGBT) people: building a foundation for better understanding; Board on the Health of Select Populations; Institute of Medicine, The National Academy of Science. Washington DC, 2011.
6. Coulter RW, Kenst KS, Bowen DJ, Scout S. Research funded by the National Institutes of Health on the health of the lesbian, gay, bisexual and transgender populations. *American Journal of Public Health* 2014;104(2):e105-12
7. Meads C, Pennant M, McManus J, Bayliss S. A systematic review of lesbian, gay, bisexual and transgender health in the West Midlands region of the UK compared to published UK research. University of Birmingham: Birmingham 2009  
<http://www.birmingham.ac.uk/Documents/collegemds/haps/projects/WMHTAC/REPreports/2009/LGBThealth030409finalversion.pdf>
8. Hudson-Sharp N, Metcalf H. Inequality among lesbian, gay bisexual and transgender groups in the UK: a review of evidence. National Institute of Economic and Social Research, London 2016
9. Edmondson D, Hodges R, Williams H. The lesbian, gay, bisexual and trans public health outcomes framework companion document, 2016 update. National LGB&T Partnership, 2016
10. Blondeel K, Say L, Chou D, Toskin R, Khosla R, Scolaro E, et al. Evidence and knowledge gaps on the disease burden in sexual and gender minorities: a review of systematic reviews. *International Journal for Equity in Health* 2016;15:16
11. Wang H, Naghavi M, Allen C, Barber RM, Bhutta Z, Carter A et al. Global, regional, and national life expectancy, all-cause mortality, and cause-specific mortality for 249 causes of death, 1980–2015: a systematic analysis for the Global Burden of Disease Study 2015. *Lancet* 2016;388(10053):1459–1544
12. Eliason M. Chronic Physical Health Problems in Sexual Minority Women: Review of the Literature. *LGBT Health*. 2015;1(4):259-69
13. Simoni J, Smith L, Oost KM, Lehavot K, Fredriksen-Goldsen K (): Disparities in Physical Health Conditions Among Lesbian and Bisexual Women: A Systematic Review of Population-Based Studies, *Journal of Homosexuality* 2016, DOI: 10.1080/00918369.2016.1174021
14. Higgins G, Green S (eds). *Cochrane Handbook of systematic reviews of interventions*. Wiley-Blackwell, Chichester, 2008



15. Blosnich JR, Lee JG, Bossarte R, Silenzio VM. Asthma disparities and within-group differences in a national probability sample of same-sex partnered adults. *American Journal of Public Health* 2013;103(9):e83-7
16. Blosnich JR, Farmer GW, Lee JG, Silenzio VM, Bowen DJ. Health inequalities among sexual minority adults: Evidence from ten U.S. states 2010. *American Journal of Preventive medicine* 2014;46(4):337-49
17. Boehmer U, Miao X, Linkletter C, Clark MA. Health conditions in younger, middle and older ages: are there differences by sexual orientation? *LGBT Health* 2014;1(3):168-76
18. Conron KJ, Mimiaga MJ, Landers SJ. A population-based study of sexual orientation identity and gender differences in adult health. *American Journal of Public Health*. 2010;100:1953–1960
19. Dilley JA, Simmons KW, Boysun MJ, Pizacani BA, Stark MJ. Demonstrating the importance and feasibility of including sexual orientation in public health surveys: Health disparities in the Pacific Northwest. *American Journal of Public Health* 2010;100(3):460-7
20. Everett B, Mollborn S. Differences in hypertension by sexual orientation among U.S. young adults. *Journal of community Health* 2013;38:588-96
21. Farmer GW, Jabson JM, Bucholz KK, Bowen DJ. A Population-Based Study of Cardiovascular Disease Risk in Sexual-Minority Women. *American Journal of Public Health*. 2013;103:1845–1850
22. Fredriksen-Goldsen KI, Kim H-J, Barkan SE. Disability among Lesbian, Gay, and Bisexual Adults: Disparities in Prevalence and Risk *American Journal of Public Health*. 2012;102: e16–e21.
23. Fredriksen-Goldsen KI, Kim H-J, Barkan SE, Muraco A, Hoy-Ellis CP. Health disparities among lesbian, gay and bisexual older adults: results from a population-based study. *American Journal of Public Health* 2013;103(10):1802-9
24. Frisch M, Simonsen J. Marriage, cohabitation and mortality in Denmark: national cohort study of 6.5 million persons followed for up to three decades (1982–2011). *International Journal of Epidemiology* 2013;42:559–578
25. Garland-Forshee RY, Fiala SC, Ngo DL, Moseley K. Sexual orientation and sex differences in adult chronic conditions, health risk factors, and protective health practices, Oregon, 2005–2008. *Preventing Chronic Disease* 2014;11:140126.
26. Jackson CL, Agenor M, Johnson DA, Bryn Austin S, Kawachi I. Sexual orientation identity disparities in health behaviors, outcomes, and services use among men and women in the United States: a cross-sectional study. *BMC Public Health* (2016) 16:807
27. Kann L, O'Malley Olsen E, McManus T, Harris WA, Shanklin SL, Flint KH, Queen B, Lowry R, Chven D, Whittle L, Thornton J, Lim C, Yanakawa Y, Brener N, Zaza S. Sexual Identity, Sex of Sexual Contacts, and Health-Related Behaviors Among Students in Grades 9–12 – United States and Selected Sites, 2015. *MMWR*;2016;65(9):1-202
28. Matthews DD, Lee JG. A profile of North Carolina lesbian, gay and bisexual health disparities 2011. *American Journal of Public Health* 2014;104(6):e98-e105
29. McNair R, Hegarty K. Guidelines for the Primary Care of Lesbian, Gay, and Bisexual People: A Systematic Review. *Annals of Family Medicine* 2010;8:533-541
30. Ward BW, Joestl SS, Galinsky AM, Dahlhamer JM. Selected Diagnosed Chronic Conditions by Sexual Orientation: A National Study of US Adults, 2013. *Preventing Chronic Disease* 2015;12:150292
31. Clark CJ, Borowsky IW, Salisbury J, Usher J, Spencer RA, Przedworski JM, Renner LM, Fisher C, Everson-Rose SA. Disparities in long-term cardiovascular disease risk by sexual identity:

- 1  
2  
3 The National Longitudinal Study of Adolescent to Adult Health. *Preventive Medicine*  
4 2015;76:26-30
- 5 32. Wallace SP, Cochran SD, Durazo EM, Ford CL. The health of aging lesbian, gay and bisexual  
6 adults in California. Los Angeles. UCLA Center for Health Policy Research 2011.
- 7 33. Thomas M; Bruton A; Moffat M; Cleland J. Asthma and psychological dysfunction. *Primary*  
8 *Care Respiratory Journal: Journal of the General Practice Airways Group.* 2011;20 (3): 250–6  
9
- 10 34. Semlyen J, King M, Varney J, Hagger-Johnson G. Sexual orientation and symptoms of  
11 common mental disorder or low wellbeing: combined meta-analysis of 12 UK population  
12 health surveys. *BMC Psychiatry* 2016;16:67
- 13 35. King M, Semlyen J, See Tai S, Killaspy H, Osborn D, Popelyuk D, Nazareth I. A systematic  
14 review of mental disorder, suicide, and deliberate self harm in lesbian, gay and bisexual  
15 people. *BMC Psychiatry* 2008;8:70
- 16 36. Eliason MJ, Ingraham N, Fogel, SC, McElroy JA, Lorvick J, Mauery DR, Haynes S. A systematic  
17 review of the literature on weight in sexual minority women. *Women's Health Issues*  
18 2015;25(2): 162–175
- 19 37. Meng L; Chen D; Yang Y; Zheng Y; Hui R. Depression increases the risk of hypertension  
20 incidence: a meta-analysis of prospective cohort studies. *Journal of Hypertension.*  
21 2012;30(5):842–51.
- 22 38. Dahlhamer JM, Galinsky AM, Joestl SS, Ward BW. Barriers to Health Care Among Adults  
23 Identifying as Sexual Minorities: A US National Study, *American Journal of Public Health*  
24 2016;106(6):1116-1122.
- 25 39. Urwin S, Whittaker W. Inequalities in family practitioner use by sexual orientation: evidence  
26 from the English General Practice Patient Survey. *BMJ Open* 2016;6:e011633
- 27 40. Alencar Albuquerque G, de Lima Garcia C, da Silva Quirino G, et al. Access to health services  
28 by lesbian, gay, bisexual, and transgender persons: systematic literature review. *BMC*  
29 *International Health and Human Rights.* 2016;16:2. doi:10.1186/s12914-015-0072-9.
- 30 41. Standardisation Committee for Care Information (SCCI). Advance Notification – New  
31 Information Standard.  
32 <http://content.digital.nhs.uk/media/22530/2094512015an/pdf/2094512015an.pdf> accessed  
33 March 2017  
34  
35  
36  
37  
38  
39  
40  
41  
42  
43  
44  
45  
46  
47  
48  
49  
50  
51  
52  
53  
54  
55  
56  
57  
58  
59  
60

## Tables and figures, with web appendix

Table 1. Characteristics of included studies.

Table 2. Prevalence of asthma by sexual orientation

Figure 1. Subgroup meta-analysis of asthma in lesbians, bisexual women and SMW

### WEB APPENDIX

Web Supplement 1. – Search strategies

Web Table 1. Participant baseline characteristics

Web Table 2. CASP quality assessment results

Web Table 3. Prevalence of cardiovascular disease or CVD symptoms by sexual orientation

Web Table 4. Prevalence of hypertension or hypertensive medication use by sexual orientation

Web Table 5. Prevalence of any type of diabetes mellitus by sexual orientation

Web Figure 1. PRISMA flow diagram

Web Figure 2a. CVD in lesbians

Web Figure 2b, CVD in bisexual women

Web Figure 3a. Hypertension in lesbians

Web Figure 3b. Hypertension in bisexual women

Web Figure 4a. Diabetes mellitus in lesbians

Web Figure 4b. Diabetes mellitus in bisexual women

Table 1. Characteristics of included studies

| First author (year)                                                                    | Survey method, Exposure                                                                                                                  | Population, setting, country                                                                                                            | Sexual orientation/behaviour question                                                                                                                           | Comparison                          | Recruitment, data collection                                               | Outcomes of interest*           | Study design, funding                                             |
|----------------------------------------------------------------------------------------|------------------------------------------------------------------------------------------------------------------------------------------|-----------------------------------------------------------------------------------------------------------------------------------------|-----------------------------------------------------------------------------------------------------------------------------------------------------------------|-------------------------------------|----------------------------------------------------------------------------|---------------------------------|-------------------------------------------------------------------|
| <b>Mortality studies</b>                                                               |                                                                                                                                          |                                                                                                                                         |                                                                                                                                                                 |                                     |                                                                            |                                 |                                                                   |
| Frisch (2013)                                                                          | National demographic data from Danish Civil Registration System, including mortality data                                                | Population, marriage, living in same sex or opposite sex cohabitation for at least 1 year between 1982 and 2011, Denmark                | Cohabitation record, marriage record (same sex marriage from 1989, (NB 75.6% same sex cohabiting women were same sex married)                                   | Opposite sex cohabitation, marriage | National demographic data collection                                       | Mortality                       | Population cohort Supported by – not reported (NR)                |
| <b>Surveys based on multi-state Behavioral Risk Factor Surveillance System (BRFSS)</b> |                                                                                                                                          |                                                                                                                                         |                                                                                                                                                                 |                                     |                                                                            |                                 |                                                                   |
| Blosnich (2013)                                                                        | Telephone-based (landline) random digit dialled interview. Had ever been told by a health professional that they had (a named condition) | English or Spanish speaking non-institutionalized adults in partnerships. All states, USA                                               | Various similar in the 10 states with response options heterosexual or straight; homosexual, gay or lesbian; bisexual; other; and opposite or same sex partner. | Opposite sex partnered women        | Behavioral Risk Factor Surveillance System (BRFSS) for all US States 2004. | Current asthma, lifetime asthma | Population survey. Supported by a National Research Service award |
| Blosnich (2014)                                                                        | Telephone-based (landline) random digit dialled interview. Had ever been told by a health professional that they had (a named condition) | English or Spanish speaking non-institutionalized adults. Alaska, Arizona, California, Maine, Massachusetts, Montana, New Mexico, North | Various similar in the 10 states with response options heterosexual or straight; homosexual, gay or lesbian; bisexual; other.                                   | Heterosexual women                  | Behavioral Risk Factor Surveillance System (BRFSS) for 10 States 2010.     | CVD symptoms, asthma, diabetes  | Population survey. Supported by National Research Service awards. |

| First author (year)                                                                     | Survey method, Exposure                                                                                                                  | Population, setting, country                                                             | Sexual orientation/behaviour question                                                                          | Comparison         | Recruitment, data collection                                             | Outcomes of interest*                                   | Study design, funding                                                                                         |
|-----------------------------------------------------------------------------------------|------------------------------------------------------------------------------------------------------------------------------------------|------------------------------------------------------------------------------------------|----------------------------------------------------------------------------------------------------------------|--------------------|--------------------------------------------------------------------------|---------------------------------------------------------|---------------------------------------------------------------------------------------------------------------|
|                                                                                         |                                                                                                                                          | Dakota, Washington, Wisconsin, USA                                                       |                                                                                                                |                    |                                                                          |                                                         |                                                                                                               |
| <b>Surveys based on single state Behavioral Risk Factor Surveillance System (BRFSS)</b> |                                                                                                                                          |                                                                                          |                                                                                                                |                    |                                                                          |                                                         |                                                                                                               |
| Conron (2010)                                                                           | Telephone-based (landline) random digit dialled interview. Had ever been told by a health professional that they had (a named condition) | English, Spanish or Portuguese speaking non-institutionalized adults. Massachusetts, USA | A heterosexual or straight, B homosexual, gay or lesbian, C bisexual or D something else? (D answers excluded) | Heterosexual women | Massachusetts Behavioral Risk Factor Surveillance System (BRFSS) 2001-8. | Heart disease, diabetes, asthma                         | Population survey. Supported by Massachusetts Department of Public Health HIV/AIDS Bureau and Ford Foundation |
| Garland-Forshee (2014)                                                                  | Telephone-based (landline) random digit dialled interview. Had ever been told by a health professional that they had (a named condition) | English or Spanish speaking non-institutionalized adults, Oregon, USA                    | A heterosexual or straight, B homosexual, gay or lesbian, C bisexual or D other? (D answers excluded)          | Heterosexual women | Oregon Behavioral Risk Factor Surveillance System 2005-8                 | Cardiovascular disease, hypertension, diabetes, asthma  | Population survey. Supported by Center for Disease Control grants.                                            |
| Matthews (2014)                                                                         | Telephone-based (landline) random digit dialled interview. Had ever been told by a health professional that they had (a named condition) | English or Spanish speaking non-institutionalized adults. North Carolina, USA            | A heterosexual or straight, B homosexual, gay or lesbian, C bisexual or D other? (D answers excluded)          | Heterosexual women | North Carolina Behavioral Risk Factor Surveillance System 2011           | Angina or heart disease, hypertension, diabetes, asthma | Population survey. Supported by National Institute for Mental Health grant.                                   |
| Dilley (2010) and                                                                       | Telephone-based (landline) random digit dialled                                                                                          | English or Spanish speaking non-institutionalized                                        | A heterosexual or straight, B homosexual                                                                       | Heterosexual women | Washington State Behavioral Risk Factor Surveillance                     | Diabetes, hypertension, (asthma),                       | Population survey. Supported by Washington                                                                    |

| First author (year)                                        | Survey method, Exposure                                                                                                                  | Population, setting, country                                                           | Sexual orientation/behaviour question                                                                          | Comparison                      | Recruitment, data collection                                                 | Outcomes of interest*                                                                                                                     | Study design, funding                                                                 |
|------------------------------------------------------------|------------------------------------------------------------------------------------------------------------------------------------------|----------------------------------------------------------------------------------------|----------------------------------------------------------------------------------------------------------------|---------------------------------|------------------------------------------------------------------------------|-------------------------------------------------------------------------------------------------------------------------------------------|---------------------------------------------------------------------------------------|
|                                                            | interview. Had ever been told by a health professional that they had (a named condition)                                                 | sed adults. Washington, USA                                                            | al, gay or lesbian, C bisexual or D something else? (D answers excluded)                                       |                                 | e System (BRFSS) 2003-6.                                                     |                                                                                                                                           | State Tobacco Prevention and Control Program and BRFSS                                |
| Fredriksen-Goldsen (2012) and                              | Telephone-based (landline) random digit dialled interview. Had ever been told by a health professional that they had (a named condition) | English or Spanish speaking non-institutionalized adults. Washington, USA              | A heterosexual or straight, B homosexual, gay or lesbian, C bisexual or D something else? (D answers excluded) | Heterosexual women              | Washington State Behavioral Risk Factor Surveillance System (BRFSS) 2003-9.  | Asthma                                                                                                                                    | Population survey. Supported by NIH and National Institute on Aging grants            |
| Fredriksen-Goldsen (2013)                                  | Telephone-based (landline) random digit dialled interview. Had ever been told by a health professional that they had (a named condition) | English or Spanish speaking non-institutionalized adults aged over 50. Washington, USA | A heterosexual or straight, B homosexual, gay or lesbian, C bisexual or D something else? (D answers excluded) | Heterosexual women aged over 50 | Washington State Behavioral Risk Factor Surveillance System (BRFSS) 2003-10. | Cardiovascular disease (asthma, diabetes, hypertension),                                                                                  | Population survey. Supported by National Institute on Aging grant                     |
| <b>Studies based on other US national or state surveys</b> |                                                                                                                                          |                                                                                        |                                                                                                                |                                 |                                                                              |                                                                                                                                           |                                                                                       |
| Jackson (2016) and Ward (2015)                             | In-person interviews using cluster-based probability sampling. Had ever been told by a health professional that they had (a named        | Non-institutionalized adults. USA                                                      | Straight (not lesbian or gay); gay or lesbian; bisexual; something else? (something else answers excluded)     | Straight women                  | National Health Interview Survey 2013-14                                     | Diabetes, heart disease (CHD or any other kind of heart disease, angina pectoris or a myocardial infarction), stroke, hypertension Asthma | Population survey Supported by several grants including from Harvard Catalyst and NIH |

| First author (year) | Survey method, Exposure                                                                                                           | Population, setting, country                                     | Sexual orientation n/behaviour question                                                                                                                                                                                                                         | Comparison                                                  | Recruitment, data collection                    | Outcomes of interest*                                                  | Study design, funding                                                    |
|---------------------|-----------------------------------------------------------------------------------------------------------------------------------|------------------------------------------------------------------|-----------------------------------------------------------------------------------------------------------------------------------------------------------------------------------------------------------------------------------------------------------------|-------------------------------------------------------------|-------------------------------------------------|------------------------------------------------------------------------|--------------------------------------------------------------------------|
|                     | condition), or diagnosed by a doctor (CVD)                                                                                        |                                                                  |                                                                                                                                                                                                                                                                 |                                                             |                                                 | (Ward)                                                                 |                                                                          |
| Kann (2016)         | School questionnaire - based survey, nationally representative data. Had ever been told by a doctor or nurse that they had asthma | Students in grades 9–12 (aged 14–18) attending high schools, USA | Which of the following best describes you? “heterosexual (straight),” “gay or lesbian,” “bisexual,” or “not sure.” AND During your life, with whom have you had sexual contact? “I have never had sexual contact,” “females,” “males,” and “females and males.” | Heterosexual female students AND Sexual contact with males. | Youth Risk Behavior Surveillance System (YRBSS) | Lifetime asthma                                                        | Population survey Supported by Center for Disease Control and Prevention |
| Boehmer (2014) and  | Telephone-based random digit dialled interview. Had ever been told by a health professional that they had (a named condition)     | Adults aged over 20 with telephone and living in California      | Identified as heterosexual; gay or lesbian; bisexual (excluded celibate and non-sexual responses)                                                                                                                                                               | Heterosexual women                                          | California Health Interview Survey 2001-7       | Heart disease, hypertension, hypertensive medication, diabetes, asthma | Population survey. Supported by – NR                                     |
| Wallace (2011)      | Telephone-based survey.                                                                                                           | Lesbian and bisexual women                                       | NR                                                                                                                                                                                                                                                              | Heterosexual women                                          | California Health Interview                     | (Heart disease, hypertension                                           | Population survey. Supported                                             |

| First author (year)                                    | Survey method, Exposure                                                                                                                                                                                 | Population, setting, country                                                                 | Sexual orientation/behaviour question                                                                                                                                                                               | Comparison              | Recruitment, data collection                                       | Outcomes of interest*                                                                                         | Study design, funding                                                                                                                                                                                               |
|--------------------------------------------------------|---------------------------------------------------------------------------------------------------------------------------------------------------------------------------------------------------------|----------------------------------------------------------------------------------------------|---------------------------------------------------------------------------------------------------------------------------------------------------------------------------------------------------------------------|-------------------------|--------------------------------------------------------------------|---------------------------------------------------------------------------------------------------------------|---------------------------------------------------------------------------------------------------------------------------------------------------------------------------------------------------------------------|
|                                                        | Question NR                                                                                                                                                                                             | aged 50-70                                                                                   |                                                                                                                                                                                                                     | aged 50-70              | Surveys 2003-7                                                     | , diabetes,)                                                                                                  | by California Wellness Foundation                                                                                                                                                                                   |
| Farmer (2013)                                          | In-home survey. Had ever been told by a health professional that they had diabetes or sugar diabetes, responded yes to currently taking anti-hypertensives                                              | Adults aged 20-69 who completed the sexual behaviour survey. National, USA                   | Do you think of yourself as heterosexual or straight (attracted only to men); homosexual or lesbian (sexually attracted only to women); bisexual (sexually attracted to men and women); something else or not sure. | Heterosexual women      | National Health and Nutrition Examination Survey (NHANES) 2001-8   | Diabetes, anti-hypertensive medication                                                                        | National population survey Supported by National Institute for Drug Abuse and National Institute on Alcohol Use and Alcoholism grants.                                                                              |
| <b>Studies based on single waves of cohort studies</b> |                                                                                                                                                                                                         |                                                                                              |                                                                                                                                                                                                                     |                         |                                                                    |                                                                                                               |                                                                                                                                                                                                                     |
| Everett (2013) and Clark (2015)                        | Interviewer collected Hypertension results (Everett) and diabetes from fasting blood glucose sample, non-fasting glucose sample, HbA1c or self-report health provider diagnosis or use of anti-diabetic | Follow up 10-15 years after, from sample recruited originally through schools. National, USA | 100% heterosexual (straight); mostly heterosexual (straight) but somewhat attracted to people of your own sex; bisexual – attracted to males and females equally; mostly homosexual (gay)                           | 100% heterosexual women | Wave IV of National Longitudinal Study of Adolescent Health 2007-8 | Everett 2013 - Hypertension of >140 SBP and >90 DBP. Clarke 2015 - Diabetes (and antihypertensive medication) | National population cohort Supported by Eunice Shriver National Institute of Child Health and Human Development grant. (Everett 2013) and National Center for Advancing translational sciences grant. (Clarke 2015) |



| First author (year) | Survey method, Exposure                                                                                         | Population, setting, country                                                     | Sexual orientation/behaviour question                                                | Comparison                     | Recruitment, data collection                                                                          | Outcomes of interest* | Study design, funding                                            |
|---------------------|-----------------------------------------------------------------------------------------------------------------|----------------------------------------------------------------------------------|--------------------------------------------------------------------------------------|--------------------------------|-------------------------------------------------------------------------------------------------------|-----------------------|------------------------------------------------------------------|
|                     | medication in previous 4 weeks (Clarke 2015)                                                                    |                                                                                  | but somewhat attracted to people of the opposite sex; 100% homosexual (gay).         |                                |                                                                                                       |                       |                                                                  |
| McNair (2011)       | Self-completion questionnaire. Had been diagnosed or treated for a range of illnesses over the previous 3 years | Original sample aged 18-23 selected randomly from database of Medicare Australia | Exclusively heterosexual, mainly heterosexual, bisexual, mainly homosexual (lesbian) | Exclusively heterosexual women | Third survey of the young cohort of women in the Australian Longitudinal Study on Women's Health 2003 | Asthma,               | National population cohort Supported by Lesbian Health Fund, USA |

\* outcomes in brackets were reported in included study texts but not used in the systematic review due to elimination of duplicate reporting.

**Table 2. Prevalence of asthma by sexual orientation**

| Study name                               | Heterosexual             | Lesbian                     | AOR<br>(95%CI)          | Bisexual                    | AOR<br>(95%CI)          | SMW                         | AOR<br>(95%CI)             |
|------------------------------------------|--------------------------|-----------------------------|-------------------------|-----------------------------|-------------------------|-----------------------------|----------------------------|
| Blosnich 2014&                           | 15.3%#<br>(SE 0.003)     | 22.2%#<br>(SE 0.03)         | 1.50 (1.04<br>to 2.16)* | 26.4%#<br>(SE 0.04)         | 1.68 (1.07<br>to 2.63)* |                             |                            |
| Blosnich 2013<br>(lifetime<br>diagnosis) | 14.6%#<br>(NR)           |                             |                         |                             |                         | 26.1%#<br>(NR)              | 1.72<br>(1.11 to<br>2.65)* |
| Blosnich 2013<br>(current<br>diagnosis)  | 9.5%<br>(NR)             |                             |                         |                             |                         | 21.4%<br>(NR)               | 2.09<br>(1.30 to<br>3.36)* |
| Boehmer<br>2014£                         | 13.7%<br>(SE 0.16)       | 20.8%<br>(SE 1.70)          | 1.41 (1.14<br>to 1.73)* | 21.5%<br>(SE 1.76)          | 1.52 (1.24<br>to 1.87)* | NR                          | NR                         |
| Conron 2010&                             | 17.4%#<br>(SE 0.3)       | 24.9%#<br>(SE 2.3)          | 1.68 (1.32<br>to 2.14)  | 25.7%#<br>(SE 3.1)          | 1.58 (1.15<br>to 2.18)  | NR                          | NR                         |
| Fredriksen-<br>Goldsen<br>2012&          | 16.5%#                   | 19.9%#                      | 1.23 (NR)               | 31.9%#                      | 2.17 (NR)*              | NR                          | NR                         |
| Garland-<br>Forshee<br>2014&             | 12.1%#<br>(11.5 to 12.7) | 15.4%#<br>(10.8 to<br>21.7) | 1.2 (0.8 to<br>1.9)     | 25.6%#<br>(18.6 to<br>34.2) | 2.4 (1.5 to<br>3.6)*    | NR                          | NR                         |
| Kann 2016 by<br>sexual identity          | 23.0%#<br>(21.1 to 24.9) | NR                          | NR                      | NR                          | NR                      | 28.3%#<br>(24.4 to<br>32.6) | NR                         |
| Kann 2016 by<br>sexual<br>behaviour      | 25.8%#<br>(23.5 to 28.2) | NR                          | NR                      | NR                          | NR                      | 31.4%#<br>(26.9 to<br>36.4) | NR                         |
| Matthews<br>2014                         | 15.7%#                   | NR                          | NR                      | NR                          | NR                      | 27.7%#                      | 1.94<br>(0.96 to<br>3.92)  |
| McNair 2011£                             | 9.4%                     | 10.4%                       | NR                      | 18.0%*                      | NR                      | NR                          | NR                         |
| Ward 2015<br>(current<br>diagnosis)      | 8.5% (7.9 to<br>9.0)     | 9.5% (6.2<br>to 14.4)       | 1.11 (0.70<br>to 1.76)  | 12.4%<br>(7.3 to<br>20.4)   | 1.53 (0.87<br>to 2.70)  | NR                          | NR                         |

\* - statistically significant to  $p < 0.05$  or less, # - weighted percentages, & - calculated from weighted percentages, £ - calculated from unweighted percentages, RR – relative risk.

1  
2  
3 Figure 1. Meta-analysis of asthma in lesbians and in bisexual women  
4  
5  
6  
7  
8  
9  
10  
11  
12  
13  
14  
15  
16  
17  
18  
19  
20  
21  
22  
23  
24  
25  
26  
27  
28  
29  
30  
31  
32  
33  
34  
35  
36  
37  
38  
39  
40  
41  
42  
43  
44  
45  
46  
47  
48  
49  
50  
51  
52  
53  
54  
55  
56  
57  
58  
59  
60

For peer review only

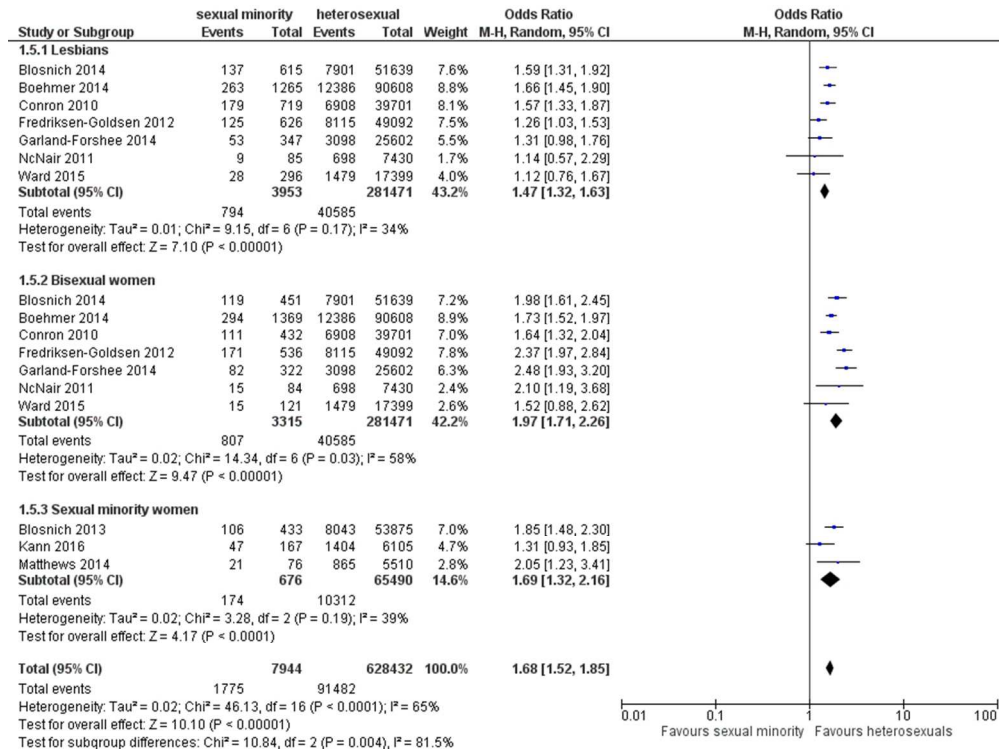

Subgroup meta-analysis of asthma in lesbians, bisexual women and SMW

319x237mm (72 x 72 DPI)

1  
2  
3 Title: A systematic review and meta-analysis of diabetes mellitus, cardiovascular and respiratory  
4 condition epidemiology in sexual minority women.  
5

6  
7 Authors: Catherine Meads<sup>1</sup>, Adam Martin<sup>2</sup>, Jeffrey Grierson<sup>1</sup>, Justin Varney<sup>3</sup>  
8  
9

## 10 WEB APPENDIX 11 12

13  
14 Web supplement 1. Search strategy for Medline, Embase, PsycInfo and CAB Abstracts. Dec 2016,  
15 Medline April 2015  
16

17 Web Table 1. Participant baseline characteristics

18 Web Table 2. Critical Appraisal Skills Programme (CASP) quality assessment results

19 Web Table 3. Prevalence of cardiovascular disease or CVD symptoms by sexual orientation

20 Web Table 4. Prevalence of hypertension or hypertensive medication use by sexual orientation

21 Web Table 5. Prevalence of any type of diabetes mellitus by sexual orientation  
22  
23

24 Web Figure 1. PRISMA flow diagram  
25  
26

27 Web Figure 2a. CVD in lesbians  
28  
29

30 Web Figure 2b, CVD in bisexual women  
31  
32

33 Web Figure 3a. Hypertension in lesbians  
34  
35

36 Web Figure 3b. Hypertension in bisexual women  
37  
38

39 Web Figure 4a. Diabetes mellitus in lesbians  
40  
41

42 Web Figure 4b. Diabetes mellitus in bisexual women  
43  
44  
45  
46  
47  
48  
49  
50  
51  
52  
53  
54  
55  
56  
57  
58  
59  
60

1  
2  
3 Web Supplement 1. – Search strategy for Medline, Embase, PsycInfo and CAB Abstracts. December  
4 2016  
5  
6

7 Database: Ovid MEDLINE(R) 1948 to Present (including In-Process & Other Non-Indexed Citations)  
8

9 Search Strategy:  
10  
11 -----

- 12  
13 1 lesbian.mp. or Homosexuality, Female/ (5704)  
14 2 Bisexuality/ or bisexual women.mp. (4142)  
15 3 wsw.mp. (120)  
16 4 WSMW.mp. (5)  
17 5 sexual orientation.mp. or Sexual Behavior/ (56050)  
18 6 sexual identity.mp. (1251)  
19 7 queer.mp. or Homosexuality/ (13250)  
20 8 1 or 2 or 3 or 4 or 5 or 6 or 7 (70952)  
21 9 limit 8 to yr="2015 -Current" (4625)  
22 10 limit 9 to female (3011)  
23 11 Great Britain/ or UK.mp. (276229)  
24 12 10 and 11 (62)  
25  
26

27 SEARCH QUERY - EMBASE  
28  
29 -----

30  
31 (((('homosexual female':ab,ti or 'bisexual female':ab,ti or 'women who have sex with women':ab,ti  
32 and [2015-2016]/py) or ('homosexual female'/exp or 'homosexual female') or 'bisexual female' or  
33 'women who have sex with women' or wsw or wsmw) and (2015:py or 2016:py or 2017:py)) and  
34 'united kingdom'  
35  
36  
37  
38

39 Database: PsycINFO <1967 to November Week 1 2016>  
40

41 Search Strategy:  
42  
43 -----

- 44  
45 1 exp Lesbianism/ or exp Sexual Orientation/ or exp Homosexuality/ or exp Bisexuality/ or  
46 lesbian\$.mp. (30632)  
47 2 bisexual women.mp. (613)  
48 3 wsw.mp. (46)  
49 4 wsmw.mp. (2)  
50 5 sexual identity.mp. (3150)  
51 6 queer.mp. (3030)  
52 7 1 or 2 or 3 or 4 or 5 or 6 (32610)  
53 8 limit 7 to (human and yr="2015 -Current") (3331)  
54 9 limit 8 to female (1815)  
55 10 Great britain.mp. (2848)  
56 11 united kingdom.mp. (8990)  
57  
58  
59  
60

- 1  
2  
3 12 uk.mp. (30316)  
4 13 british.mp. (20760)  
5 14 gb.mp. (241)  
6 15 english.mp. (118463)  
7 16 scottish.mp. (2638)  
8 17 welsh.mp. (1111)  
9 18 irish.mp. (3268)  
10 19 10 or 11 or 12 or 13 or 14 or 15 or 16 or 17 or 18 (177759)  
11 20 9 and 19 (57)  
12  
13  
14  
15

16 Database: CAB Abstracts <1973 to 2016 Week 44>

17 Search Strategy:  
18  
19  
20

- 21 1 exp Lesbianism/ or exp Sexual Orientation/ or exp Homosexuality/ or exp Bisexuality/ or  
22 lesbian\$.mp. (2168)  
23 2 bisexual women.mp. (25)  
24 3 wsw.mp. (100)  
25 4 wsmw.mp. (1)  
26 5 sexual identity.mp. (113)  
27 6 queer.mp. (104)  
28 7 1 or 2 or 3 or 4 or 5 or 6 (2365)  
29 8 limit 7 to (human and yr="2015 -Current") [Limit not valid in CAB Abstracts; records were  
30 retained] (412)  
31 9 limit 8 to female [Limit not valid in CAB Abstracts; records were retained] (412)  
32 10 Great britain.mp. (34833)  
33 11 united kingdom.mp. (152174)  
34 12 uk.mp. (170127)  
35 13 british.mp. (188436)  
36 14 gb.mp. (8148)  
37 15 english.mp. (41160)  
38 16 scottish.mp. (5784)  
39 17 welsh.mp. (3198)  
40 18 irish.mp. (15558)  
41 19 10 or 11 or 12 or 13 or 14 or 15 or 16 or 17 or 18 (252567)  
42 20 9 and 19 (10)  
43  
44  
45  
46  
47  
48  
49  
50  
51  
52  
53  
54  
55  
56  
57  
58  
59  
60

1  
2  
3  
4  
5  
6  
7  
8  
9  
10  
11  
12  
13  
14  
15  
16  
17  
18  
19  
20  
21  
22  
23  
24  
25  
26  
27  
28  
29  
30  
31  
32  
33  
34  
35  
36  
37  
38  
39  
40  
41  
42  
43  
44  
45  
46  
47  
48  
49  
50  
51  
52  
53  
54  
55  
56  
57  
58  
59  
60

Database: OVID Medline April 2015

- 1 Exp Homosexuality, Female/
- 2 wsw.tw
- 3 lesbian\*.tw
- 4 gay.tw
- 5 LGBT\*.tw
- 6 homosexual\*.tw
- 7 Exp Bisexuality/
- 8 bisexual\*.tw
- 9 pan?sexual\*.tw
- 10 queer\*.tw
- 11 "sexual orientation".tw
- 12 "sexual preference\*"
- 13 "sexual minorit\*".tw
- 14 "same sex".tw
- 15 1 or 2 or 3 or 4 or 5 or 6 or 7 or 8 or 9 or 10 or 11 or 12 or 13 or 14

peer review only



Web Table 1. Participant baseline characteristics

|                 | <b>Number of heterosexual women</b> | <b>Age</b>          | <b>Ethnicity</b>                                    | <b>Number of lesbians/bisexual/SMW</b> | <b>Age</b>                                                  | <b>Ethnicity</b>                                                                                                                | <b>Demographic imbalances compared to heterosexual women.</b>                                                                       | <b>Prevalence estimates weighted by:</b>       | <b>Adjusted odds ratios weighted by:</b>                                               |
|-----------------|-------------------------------------|---------------------|-----------------------------------------------------|----------------------------------------|-------------------------------------------------------------|---------------------------------------------------------------------------------------------------------------------------------|-------------------------------------------------------------------------------------------------------------------------------------|------------------------------------------------|----------------------------------------------------------------------------------------|
| Blosnich (2014) | 51,639                              | Mean 47.3 (SE 0.16) | 61.4% white, 3.6% black, 26.3% Hispanic             | 615 lesbians, 451 bisexual women       | Mean 43.1 (SE 1.33) lesbians, 35.1 (SE 1.41) bisexual women | 70.8% white, 4.3% black, 15.9% Hispanic lesbians, 61.1% white, 5.5% black, 24.0% Hispanic bisexual women                        | SMW younger, fewer partnered, lesbians more educated, more employed, bisexual women less educated, fewer employed, less income.     | Age race/ethnicity, education, income          | Age race/ethnicity, education, income (only conducted where bivariate analyses p<0.05) |
| Blosnich (2013) | 53,875 opposite sex partnered       | Mean 33.0 (SE 0.06) | 67.5% white                                         | 433 same-sex partnered                 | Mean 32.7 (SE 0.69)                                         | 72.6% white                                                                                                                     | Same sex partnered lower income,                                                                                                    | Education, race/ethnicity, overweight, smoking | 'weighted to account for sampling design'                                              |
| Boehmer (2014)  | 90,608                              | Mean 43.0 (SE 0.03) | 50.1% white, 6.5% black, 13.0% Asian 24.6% Hispanic | 1,265 lesbians, 1,369 bisexual women   | Mean 42.4 (SE 0.47) lesbians, 36.3 (SE 0.53) bisexual women | 68.5% white, 7.4% black, 4.9% Asian 11.8% Hispanic lesbians, 57.6% white, 10.0% Asian 7.0% black, 16.9% Hispanic bisexual women | SMW younger, more white, more educated, more US born, lesbians more income, bisexual women less income, fewer with health insurance | Unadjusted prevalence reported                 | Age, race/ethnicity, education, household income, nativity                             |
| Conron (2010)   | 39,701                              | 35.2% aged 18-33    | 83.2% white, 4.1% black, 2.6% Asian, 8.9% Hispanic  | 719 lesbian, 432 bisexual women        | 30.4% lesbians, 65.1% bisexual women aged 18-33             | 87.2% white, 4.5% black, 1.2% Asian, lesbian, 5.7% Hispanic                                                                     | Lesbians more educated                                                                                                              | Age, gender                                    | Age, gender, education, income                                                         |

1  
2  
3  
4  
5  
6  
7  
8  
9  
10  
11  
12  
13  
14  
15  
16  
17  
18  
19  
20  
21  
22  
23  
24  
25  
26  
27  
28  
29  
30  
31  
32  
33  
34  
35  
36  
37  
38  
39  
40  
41  
42  
43  
44  
45  
46  
47

|                      | Number of heterosexual women | Age                            | Ethnicity                                          | Number of lesbians/bisexual/SMW                                             | Age                                                                                                                                                                 | Ethnicity                                                                                  | Demographic imbalances compared to heterosexual women.                                          | Prevalence estimates weighted by:           | Adjusted odds ratios weighted by:  |
|----------------------|------------------------------|--------------------------------|----------------------------------------------------|-----------------------------------------------------------------------------|---------------------------------------------------------------------------------------------------------------------------------------------------------------------|--------------------------------------------------------------------------------------------|-------------------------------------------------------------------------------------------------|---------------------------------------------|------------------------------------|
|                      |                              |                                |                                                    |                                                                             |                                                                                                                                                                     | 78.9% white, 4.7% black, 5.7% Asian, 9.3% Hispanic bisexual women                          |                                                                                                 |                                             |                                    |
| Dilley (2010)        | 47,505                       | Mean 46.3                      | 85.6% white, 1.8% black, 3.6% Asian, 7.1% Hispanic | 589 lesbian, 561 bisexual women                                             | Mean 40.0<br>lesbian, 32.9<br>bisexual women.                                                                                                                       | 85.5% white, 1.6% black, 3.1% Asian, 7.2% Hispanic                                         | More higher education in lesbians, less in bisexual women. Lesbians and bisexuals lower income. | Assumed that unadjusted prevalence reported | Sexual orientation, age, education |
| Everett (2013)       | 6,072                        | Mean 28.7 (whole sample)       | NR                                                 | 138 gay/mostly gay 1345 bisexual/ mostly heterosexual,                      | NR                                                                                                                                                                  | NR                                                                                         | NR                                                                                              | Possibly unadjusted prevalence reported     | N/A                                |
| and<br>Clarke (2015) | 5713                         | Mean 28.8 (95%CI 28.6 to 29.1) | 67.7% white                                        | 71 homosexual, 60 mostly homosexual, 154 bisexual, 1089 mostly heterosexual | Mean (95%CI) 28.9 (28.3 to 29.5),<br>homosexual, 28.4 (27.8 to 29.0) mostly homosexual,<br>28.3 (27.9 to 28.6) bisexual,<br>28.5 (28.2 to 28.7) mostly heterosexual | White 64.1% homosexual, 73.2% mostly homosexual, 69.4% bisexual, 77.5% mostly heterosexual | NR                                                                                              | See above                                   | N/A                                |

1  
2  
3  
4  
5  
6  
7  
8  
9  
10  
11  
12  
13  
14  
15  
16  
17  
18  
19  
20  
21  
22  
23  
24  
25  
26  
27  
28  
29  
30  
31  
32  
33  
34  
35  
36  
37  
38  
39  
40  
41  
42  
43  
44  
45  
46  
47

|                            | Number of heterosexual women | Age                 | Ethnicity                                | Number of lesbians/bisexual/SMW  | Age                                                        | Ethnicity                                        | Demographic imbalances compared to heterosexual women.                                                                             | Prevalence estimates weighted by:       | Adjusted odds ratios weighted by:                             |
|----------------------------|------------------------------|---------------------|------------------------------------------|----------------------------------|------------------------------------------------------------|--------------------------------------------------|------------------------------------------------------------------------------------------------------------------------------------|-----------------------------------------|---------------------------------------------------------------|
| Farmer (2013)              | 5,356                        | 36.2% aged 20-29    | 69.8% white, 12.0% black, 12.9% Hispanic | 437 SMW                          | 49.2% aged 20-29                                           | 73.4% white, 13.2% black, 8.6% Hispanic          | SMW younger                                                                                                                        | Possibly unadjusted prevalence reported | N/A                                                           |
| Fredrikse n-Goldsen (2012) | 49,092                       | Mean 46.6 (SE 0.12) | 83.7% white                              | 626 lesbians, 536 bisexual women | Mean 42.9 (SE 0.81) lesbian, 32.7 (SE 0.85) bisexual women | 85.4% white lesbian, 78.2% white bisexual women. | SMW younger, fewer partnered, lesbians less education, bisexual women lower income                                                 | Age                                     | Age, education, income                                        |
| Fredrikse n-Goldsen (2013) | 57,466                       | Mean 63.8 (SD 0.06) | 91.8% white                              | 562 lesbians, 291 bisexual women | Mean 58.6 (SD 0.37)                                        | 90.3% white                                      | SMW more employed, fewer partnered, fewer less educated                                                                            | Unclear weighting factors               | Age, education, income                                        |
| Frisch (2013)              | 61,993,266                   | Aged 18+            | NR                                       | 655,941 same sex cohabiting      | Aged 18+                                                   | NR                                               | NR                                                                                                                                 | (Mortality estimate - by age)           | N/A                                                           |
| Garland-Forshee (2014)     | 25,602                       | 28.8% aged 18-34    | 86.7% white                              | 347 lesbians, 322 bisexual women | 26.9% lesbian, 62.3% bisexual women aged 18-34             | 81.6% lesbians, 85.8% bisexual women white       | SMW less likely to be partnered, more education, more urban residence, Lesbians more employed, Bisexual women younger, less income | Unclear weighting factors               | Age, education, relationship status, rural or urban residency |
| Jackson (2016)             | 37,185                       | NR                  | 68.3% white, 12.3%                       | 525 lesbians, 353 bisexual women | NR                                                         | 71.4% white, 12.7% black,                        | Lesbians more educated, fewer                                                                                                      | Age, ethnicity, educational attainment, | Age race/ethnicity, education,                                |

1  
2  
3  
4  
5  
6  
7  
8  
9  
10  
11  
12  
13  
14  
15  
16  
17  
18  
19  
20  
21  
22  
23  
24  
25  
26  
27  
28  
29  
30  
31  
32  
33  
34  
35  
36  
37  
38  
39  
40  
41  
42  
43  
44  
45  
46  
47

|                       | Number of heterosexual women | Age              | Ethnicity                               | Number of lesbians/bisexual/SMW  | Age              | Ethnicity                                                                        | Demographic imbalances compared to heterosexual women.    | Prevalence estimates weighted by:                                               | Adjusted odds ratios weighted by:                                                                                 |
|-----------------------|------------------------------|------------------|-----------------------------------------|----------------------------------|------------------|----------------------------------------------------------------------------------|-----------------------------------------------------------|---------------------------------------------------------------------------------|-------------------------------------------------------------------------------------------------------------------|
|                       |                              |                  | black, 12.9% Hispanic                   |                                  |                  | 12.5% Hispanic lesbian<br>73.5% white, 16.0% black, 7.2% Hispanic bisexual women | partnered, bisexual women less income                     | annual household income, occupational class, health status, region of residence | income, occupational class, health status, region of residence                                                    |
| Ward (2015)           | 17,399                       | NR               | NR                                      | 296 lesbians, 121 bisexual women | NR               | NR                                                                               | NR                                                        | As Jackson 2016 above                                                           | Age, race/ethnicity, education, income, marriage status, employment, health insurance status, region of residence |
| Kann (2016) identity  | 6,105                        | NR               | NR                                      | 167 lesbian, 734 bisexual women  | NR               | NR                                                                               | NR                                                        | Sex, race/ethnicity and grade                                                   | N/A                                                                                                               |
| Kann (2016) behaviour | 3,054                        | NR               | NR                                      | 173 lesbians, 572 bisexual women | NR               | NR                                                                               | NR                                                        | Sex, race/ethnicity and grade                                                   | N/A                                                                                                               |
| Matthews (2014)       | 6,110                        | 25.7% aged 18-34 | 71.3% white, 20.7% black, 5.2% Hispanic | 86 SMW                           | 40.6% aged 18-34 | 77.7% white, 14.1% black, 1.7% Hispanic                                          | SMW younger, more likely to use mobile phones             | Survey design                                                                   | Age                                                                                                               |
| McNair (2011)         | 8,083                        | 25-30            | NR                                      | 99 lesbians, 100 bisexual women  | 25-30            | NR                                                                               | SMW lower income, less likely to be partnered, fewer with | Unclear weighting factors                                                       | N/A                                                                                                               |

1  
2  
3  
4  
5  
6  
7  
8  
9  
10  
11  
12  
13  
14  
15  
16  
17  
18  
19  
20  
21  
22  
23  
24  
25  
26  
27  
28  
29  
30  
31  
32  
33  
34  
35  
36  
37  
38  
39  
40  
41  
42  
43  
44  
45  
46  
47

| Number of heterosexual women | Age | Ethnicity | Number of lesbians/bisexual/SMW | Age | Ethnicity | Demographic imbalances compared to heterosexual women. | Prevalence estimates weighted by: | Adjusted odds ratios weighted by: |
|------------------------------|-----|-----------|---------------------------------|-----|-----------|--------------------------------------------------------|-----------------------------------|-----------------------------------|
|------------------------------|-----|-----------|---------------------------------|-----|-----------|--------------------------------------------------------|-----------------------------------|-----------------------------------|

children, more urban residence, Lesbians more educated, bisexual women less educated,

For peer review only

1  
2  
3  
4  
5  
6  
7  
8  
9  
10  
11  
12  
13  
14  
15  
16  
17  
18  
19  
20  
21  
22  
23  
24  
25  
26  
27  
28  
29  
30  
31  
32  
33  
34  
35  
36  
37  
38  
39  
40  
41  
42  
43  
44  
45  
46  
47

**Web Table 2. Critical Appraisal Skills Programme (CASP) quality assessment results**

| <b>Study</b>              | <b>1</b> | <b>2</b> | <b>3</b> | <b>4</b> | <b>5a</b> | <b>5b</b> | <b>6a</b> | <b>6b</b> | <b>9</b> | <b>10</b> | <b>11</b> |
|---------------------------|----------|----------|----------|----------|-----------|-----------|-----------|-----------|----------|-----------|-----------|
| Blosnich (2014)           | Y        | Y        | Y        | N        | n         | CT        | N/A       | N/A       | Y        | Y         | Y         |
| Blosnich (2013)           | Y        | Y        | CT       | N        | N         | CT        | N/A       | N/A       | Y        | Y         | Y         |
| Boehmer (2014)            | Y        | Y        | Y        | N        | CT        | N         | N/A       | N/A       | Y        | Y         | Y         |
| Clarke (2015)             | Y        | Y        | Y        | Y        | N         | CT        | N/A       | N/A       | Y        | Y         | Y         |
| Conron (2010)             | Y        | Y        | Y        | N        | N         | CT        | N/A       | N/A       | Y        | Y         | Y         |
| Dilley (2010)             | Y        | Y        | Y        | N        | N         | CT        | N/A       | N/A       | Y        | Y         | Y         |
| Everett (2013)            | Y        | Y        | Y        | Y        | N         | CT        | N/A       | N/A       | Y        | Y         | Y         |
| Farmer (2013)             | Y        | Y        | Y        | N        | N         | CT        | N/A       | N/A       | Y        | Y         | Y         |
| Fredriksen-Goldsen (2012) | Y        | Y        | Y        | N        | N         | CT        | N/A       | N/A       | Y        | Y         | Y         |
| Fredriksen-Goldsen (2013) | Y        | Y        | Y        | N        | N         | CT        | N/A       | N/A       | Y        | Y         | Y         |
| Frisch (2013)             | Y        | Y        | CT       | Y        | N         | CT        | CT        | Y         | Y        | Y         | N/A       |
| Garland-Forshee (2014)    | Y        | Y        | Y        | N        | N         | CT        | N/A       | N/A       | Y        | Y         | Y         |
| Jackson (2016)            | Y        | Y        | Y        | N        | N         | Y         | N/A       | N/A       | Y        | Y         | Y         |

| Study           | 1 | 2 | 3 | 4 | 5a | 5b | 6a  | 6b  | 9 | 10 | 11 |
|-----------------|---|---|---|---|----|----|-----|-----|---|----|----|
| Kann (2016)     | Y | Y | Y | N | N  | Y  | N/A | N/A | Y | Y  | Y  |
| Matthews (2014) | Y | Y | Y | N | CT | CT | N/A | N/A | Y | Y  | Y  |
| McNair (2011)   | Y | Y | Y | N | N  | CT | N/A | N/A | Y | Y  | Y  |
| Ward (2015)     | Y | Y | Y | N | N  | CT | N/A | N/A | Y | Y  | Y  |

The checklist questions were 1. Did the study address a clearly focused issue? 2. Was the cohort recruited in an acceptable way? 3. Was the exposure accurately measured to minimise bias? 4. Was the outcome accurately measured to minimise bias? 5a. Have the authors identified all important confounding factors? 5b) Have they taken account of the confounding factors in the design and/or analysis? 6a. Was the follow up of subjects complete enough? 6b. Was the follow up of subjects long enough? 9. Do you believe the results? 10. Can the results be applied to the local population? 11. Do the results of this study fit with other available evidence?

1  
2  
3  
4  
5  
6  
7  
8  
9  
10  
11  
12  
13  
14  
15  
16  
17  
18  
19  
20  
21  
22  
23  
24  
25  
26  
27  
28  
29  
30  
31  
32  
33  
34  
35  
36  
37  
38  
39  
40  
41  
42  
43  
44  
45  
46  
47

**Web Table 3. Prevalence of CVD by sexual orientation**

| Study name                   | Heterosexual        | Lesbian               | AOR (95%CI)          | Bisexual              | AOR (95%CI)         | SMW    | AOR (95%CI)          |
|------------------------------|---------------------|-----------------------|----------------------|-----------------------|---------------------|--------|----------------------|
| Blosnich 2014&               | 5.8%#<br>(SE 0.002) | 5.0%#<br>(SE 0.002)   | NR                   | 7.0%#<br>(SE 0.024)   | NR                  | NR     | NR                   |
| Boehmer 2014£                | 4.9%<br>(SE 0.11)   | 5.8%<br>(SE 1.30)     | 1.46 (0.92 to 2.34)  | 3.8%<br>(SE 0.75)     | 1.14 (0.75 to 1.72) | NR     | NR                   |
| Conron 2010&                 | 1.3%#<br>(SE 0.1)   | 1.8%#<br>(SE 0.6)     | 1.92 (0.95 to 3.87)  | 3.3%#<br>(SE 2.2)     | 2.24 (0.53 to 9.43) | NR     | NR                   |
| Fredriksen-Goldsen 2013&     | 10.7%#              | NR                    | NR                   | NR                    | NR                  | 10.5%# | 1.37 (1.00 to 1.86)* |
| Garland-Forshee 2014&        | 6.2%# (5.8 to 6.6)  | 4.0%#<br>(2.1 to 7.5) | 1.0 (0.5 to 1.9)     | 1.8%#<br>(0.6 to 6.0) | 0.7 (0.2 to 2.9)    | NR     | NR                   |
| Jackson 2016 (heart disease) | 10.8%               | 9.9%                  | 0.91 (0.61 to 1.35)  | 7.2%                  | 0.73 (0.40 to 1.35) | NR     | NR                   |
| Jackson 2016 (stroke)        | 3.2%                | 5.8%                  | 1.96 (1.14 to 3.39)* | 3.4%                  | 1.68 (0.71 to 3.97) | NR     | NR                   |
| Matthews 2014                | 4.1%                | NR                    | NR                   | NR                    | NR                  | 0.4%   | 0.19 (0.04 to 0.87)  |

\* - statistically significant to p<0.05 or less, # - weighted percentages, & - calculated from weighted percentages, £ - calculated from unweighted percentages, RR – relative risk.



**Web Table 4. Prevalence of hypertension (or hypertensive medication use) by sexual orientation**

| Study name                       | Heterosexual             | Lesbian                  | AOR (95%CI)            | Bisexual                | AOR (95%CI)            | SMW   | AOR (95%CI)                      |
|----------------------------------|--------------------------|--------------------------|------------------------|-------------------------|------------------------|-------|----------------------------------|
| Boehmer 2014                     | 21.2%<br>(SE 0.19)       | 19.0%<br>(SE 1.81)       | 0.99 (0.77 to<br>1.26) | 17.6%<br>(SE 1.70)      | 1.21 (0.95 to<br>1.53) | NR    | NR                               |
| Boehmer 2014<br>(medication use) | 65.3%<br>(SE 0.47)       | 66.0%<br>(SE 4.29)       | 1.57 (0.90 to<br>2.75) | 45.0%<br>(SE 4.69)      | 0.74 (0.44 to<br>1.24) | NR    | NR                               |
| Dilley 2010                      | 22.7%<br>(22.1 to 23.4)  | 14.7%<br>(9.8 to 21.4)   | 1.0 (0.6 to 1.7)       | 17.0%<br>(12.2 to 23.1) | 1.6 (1.1 to 2.5)*      | NR    | NR                               |
| Everett 2013&                    | 12.2%#<br>(SE 0.65)      | 10.3%#<br>(SE 3.21)      | NR                     | 11.4%#<br>(SE 1.19)     | NR                     | NR    | NR                               |
| Farmer 2013£<br>(medication use) | 14.7%                    | NR                       | NR                     | NR                      | NR                     | 11.6% | Not statistically<br>significant |
| Garland-Forshee<br>2014          | 25.6%#<br>(24.3 to 26.8) | 22.9%#<br>(13.8 to 35.7) | 1.2 (0.6 to 2.4)       | 12.4%#<br>(7.5 to 19.9) | 0.9 (0.5 to 1.7)       | NR    | NR                               |
| Jackson 2016                     | 35.5%                    | 32.2%                    | 0.91 (0.74 to<br>1.12) | 32.1%                   | 0.96 (0.71 to<br>1.31) | NR    | NR                               |
| Matthews 2014                    | 33.2%                    | NR                       | NR                     | NR                      | NR                     | 22.0% | 1.00 (0.43 to<br>2.33)           |

\* - statistically significant to  $p < 0.05$  or less, # - weighted percentages, & - calculated from weighted percentages, £ - calculated from unweighted percentages, RR – relative risk.

1  
2  
3  
4  
5  
6  
7  
8  
9  
10  
11  
12  
13  
14  
15  
16  
17  
18  
19  
20  
21  
22  
23  
24  
25  
26  
27  
28  
29  
30  
31  
32  
33  
34  
35  
36  
37  
38  
39  
40  
41  
42  
43  
44  
45  
46  
47

**Web Table 5. Prevalence of any type of diabetes mellitus by sexual orientation**

| Study name           | Heterosexual         | Lesbian                | AOR (95%CI)         | Bisexual             | AOR (95%CI)         | SMW   | AOR (95%CI)                   |
|----------------------|----------------------|------------------------|---------------------|----------------------|---------------------|-------|-------------------------------|
| Blosnich 2014&       | 10.2%#<br>(SE 0.002) | 6.8%#<br>(SE 0.016)    | NR                  | 6.1%#<br>(SE 0.016)  | 0.75 (0.44 to 1.29) | NR    | NR                            |
| Boehmer 2014£        | 5.7%<br>(SE 0.12)    | 4.6%<br>(SE 0.74)      | 1.07 (0.76 to 1.50) | 4.2%                 | 1.10 (0.79 to 1.55) | NR    | NR                            |
| Clark 2015           | 6.0%                 | 1.9%                   | NR                  | 6.8%                 | NR                  | 7.2%  | NR                            |
| Conron 2010          | 3.9%<br>(SE 0.1)     | 3.8%<br>(SE 0.9)       | 1.23 (0.74 to 2.06) | 3.9%<br>(SE 1.1)     | 1.04 (0.62 to 1.76) | NR    | NR                            |
| Dilley 2010          | 6.3%<br>(6.0 to 6.5) | 5.1%<br>(3.3 to 7.7)   | 1.3 (0.8 to 2.0)    | 5.8%<br>(3.8 to 8.8) | 1.8 (1.1 to 2.8)*   | NR    | NR                            |
| Farmer 2013          | 5.3%                 | NR                     | NR                  | NR                   | NR                  | 6.4%  | Not statistically significant |
| Garland-Forshee 2014 | 6.5%<br>(6.1 to 6.8) | 10.8%<br>(4.1 to 26.0) | 2.2 (0.6 to 7.8)    | 2.4%<br>(1.2 to 5.0) | 0.8 (0.4 to 1.6)    | NR    | NR                            |
| Jackson 2016         | 10.7%                | 7.7%                   | 0.88 (0.58 to 1.34) | 7.1%                 | 0.63 (0.33 to 1.20) | NR    | NR                            |
| Matthews 2014        | 11.3%#               | NR                     | NR                  | NR                   | NR                  | 4.3%# | 0.55 (0.17 to 1.82)           |

\* - statistically significant to p<0.05 or less, # - weighted percentages, & - calculated from weighted percentages, £ - calculated from unweighted percentages, RR – relative risk.

Web Figure 1. PRISMA flow diagram

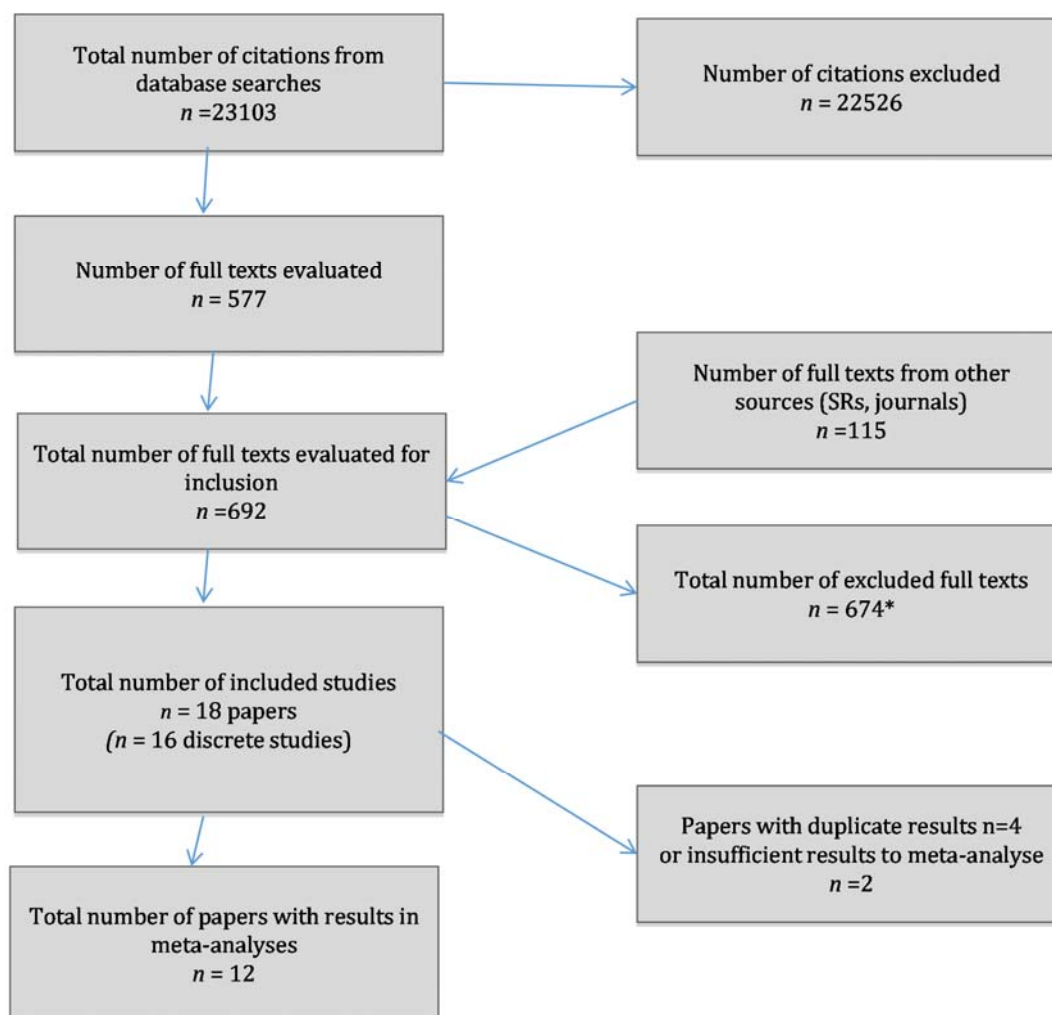

\* Reasons for 674 full text exclusions: case studies = 7, diagnostic studies = 8, experimental studies = 8, in children only = 7, no comparison with heterosexual women = 1, no relevant numerical outcomes = 94, pilot studies = 2, qualitative studies = 123, results in men and women combined only = 124, reviews/editorials = 74, surveys on wrong topic = 226.

Web Figure 2a. CVD in lesbians

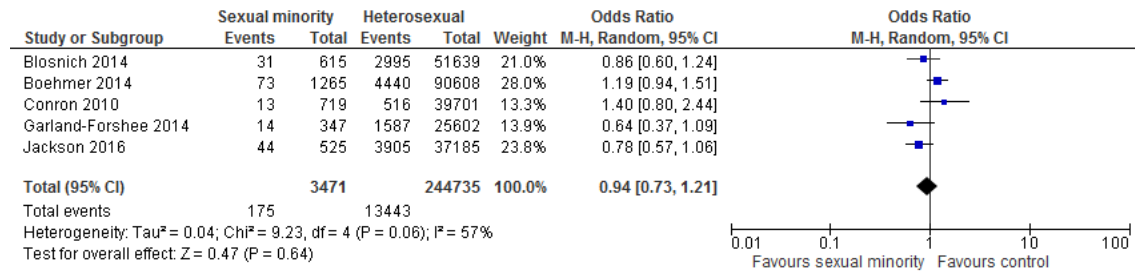

Web Figure 2b, CVD in bisexual women

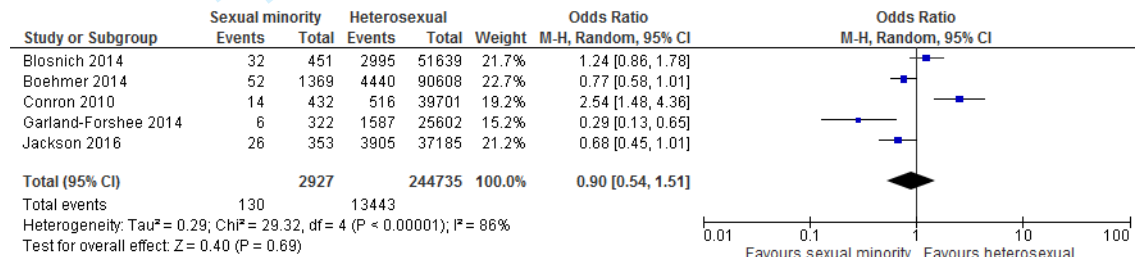

Web Figure 3a. Hypertension in lesbians

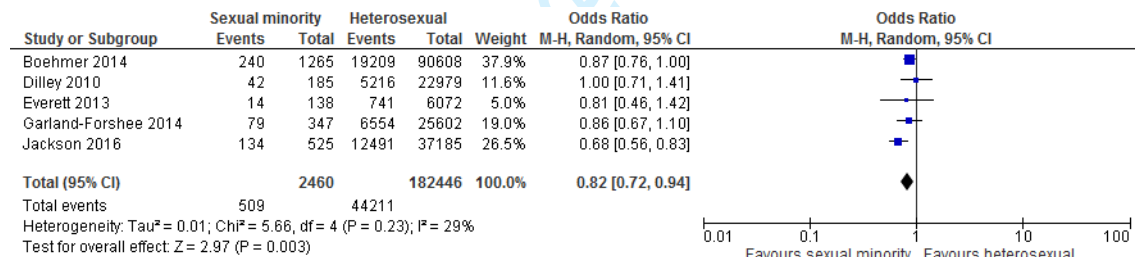

Web Figure 3b. Hypertension in bisexual women

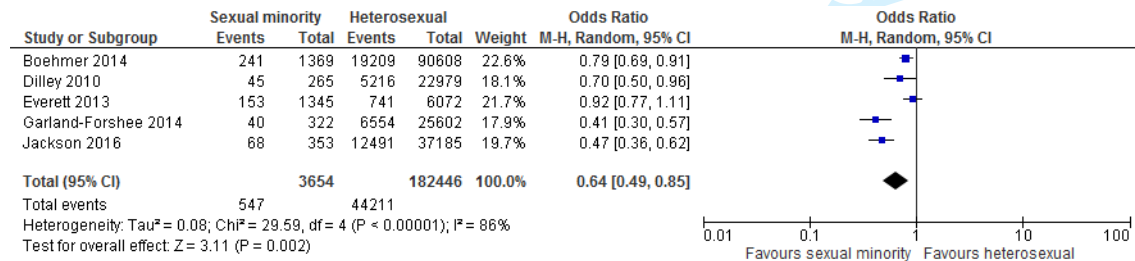

Web Figure 4a. Diabetes mellitus in lesbians

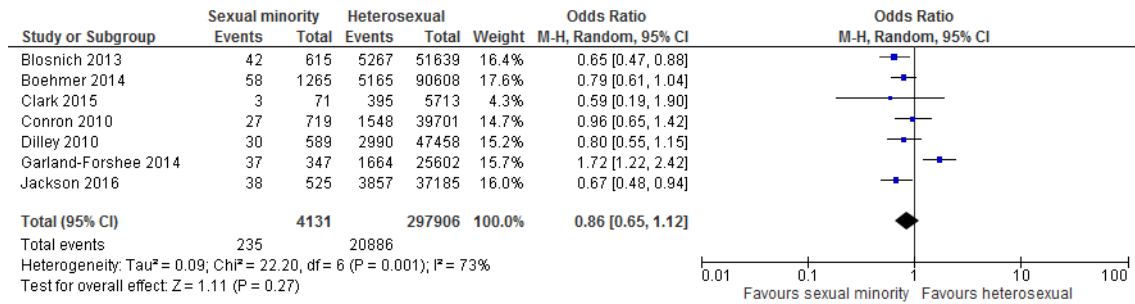

Web Figure 4b. Diabetes mellitus in bisexual women

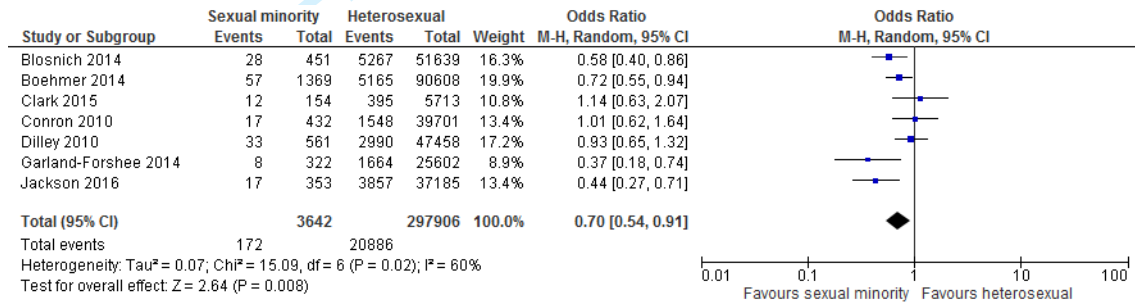



# PRISMA 2009 Checklist

| Section/topic                      | #  | Checklist item                                                                                                                                                                                                                                                                                              | Reported on page # |
|------------------------------------|----|-------------------------------------------------------------------------------------------------------------------------------------------------------------------------------------------------------------------------------------------------------------------------------------------------------------|--------------------|
| <b>TITLE</b>                       |    |                                                                                                                                                                                                                                                                                                             |                    |
| Title                              | 1  | Identify the report as a systematic review, meta-analysis, or both.                                                                                                                                                                                                                                         | 1                  |
| <b>ABSTRACT</b>                    |    |                                                                                                                                                                                                                                                                                                             |                    |
| Structured summary                 | 2  | Provide a structured summary including, as applicable: background; objectives; data sources; study eligibility criteria, participants, and interventions; study appraisal and synthesis methods; results; limitations; conclusions and implications of key findings; systematic review registration number. | 2                  |
| <b>INTRODUCTION</b>                |    |                                                                                                                                                                                                                                                                                                             |                    |
| Rationale                          | 3  | Describe the rationale for the review in the context of what is already known.                                                                                                                                                                                                                              | 4                  |
| Objectives                         | 4  | Provide an explicit statement of questions being addressed with reference to participants, interventions, comparisons, outcomes, and study design (PICOS).                                                                                                                                                  | 4                  |
| <b>METHODS</b>                     |    |                                                                                                                                                                                                                                                                                                             |                    |
| Protocol and registration          | 5  | Indicate if a review protocol exists, if and where it can be accessed (e.g., Web address), and, if available, provide registration information including registration number.                                                                                                                               | 4                  |
| Eligibility criteria               | 6  | Specify study characteristics (e.g., PICOS, length of follow-up) and report characteristics (e.g., years considered, language, publication status) used as criteria for eligibility, giving rationale.                                                                                                      | 4                  |
| Information sources                | 7  | Describe all information sources (e.g., databases with dates of coverage, contact with study authors to identify additional studies) in the search and date last searched.                                                                                                                                  | 4,5                |
| Search                             | 8  | Present full electronic search strategy for at least one database, including any limits used, such that it could be repeated.                                                                                                                                                                               | 4                  |
| Study selection                    | 9  | State the process for selecting studies (i.e., screening, eligibility, included in systematic review, and, if applicable, included in the meta-analysis).                                                                                                                                                   | 5                  |
| Data collection process            | 10 | Describe method of data extraction from reports (e.g., piloted forms, independently, in duplicate) and any processes for obtaining and confirming data from investigators.                                                                                                                                  | 5                  |
| Data items                         | 11 | List and define all variables for which data were sought (e.g., PICOS, funding sources) and any assumptions and simplifications made.                                                                                                                                                                       | 5                  |
| Risk of bias in individual studies | 12 | Describe methods used for assessing risk of bias of individual studies (including specification of whether this was done at the study or outcome level), and how this information is to be used in any data synthesis.                                                                                      | 5                  |
| Summary measures                   | 13 | State the principal summary measures (e.g., risk ratio, difference in means).                                                                                                                                                                                                                               | 5                  |
| Synthesis of results               | 14 | Describe the methods of handling data and combining results of studies, if done, including measures of consistency (e.g., $I^2$ ) for each meta-analysis.                                                                                                                                                   | 5                  |



# PRISMA 2009 Checklist

Page 1 of 2

| Section/topic                 | #  | Checklist item                                                                                                                                                                                           | Reported on page # |
|-------------------------------|----|----------------------------------------------------------------------------------------------------------------------------------------------------------------------------------------------------------|--------------------|
| Risk of bias across studies   | 15 | Specify any assessment of risk of bias that may affect the cumulative evidence (e.g., publication bias, selective reporting within studies).                                                             | 5                  |
| Additional analyses           | 16 | Describe methods of additional analyses (e.g., sensitivity or subgroup analyses, meta-regression), if done, indicating which were pre-specified.                                                         | 5                  |
| <b>RESULTS</b>                |    |                                                                                                                                                                                                          |                    |
| Study selection               | 17 | Give numbers of studies screened, assessed for eligibility, and included in the review, with reasons for exclusions at each stage, ideally with a flow diagram.                                          | 5,32               |
| Study characteristics         | 18 | For each study, present characteristics for which data were extracted (e.g., study size, PICOS, follow-up period) and provide the citations.                                                             | 15-19              |
| Risk of bias within studies   | 19 | Present data on risk of bias of each study and, if available, any outcome level assessment (see item 12).                                                                                                | 27                 |
| Results of individual studies | 20 | For all outcomes considered (benefits or harms), present, for each study: (a) simple summary data for each intervention group (b) effect estimates and confidence intervals, ideally with a forest plot. | 5-7, 20, 29-31     |
| Synthesis of results          | 21 | Present results of each meta-analysis done, including confidence intervals and measures of consistency.                                                                                                  | 21,33,34           |
| Risk of bias across studies   | 22 | Present results of any assessment of risk of bias across studies (see Item 15).                                                                                                                          | See 5              |
| Additional analysis           | 23 | Give results of additional analyses, if done (e.g., sensitivity or subgroup analyses, meta-regression [see Item 16]).                                                                                    | n/a                |
| <b>DISCUSSION</b>             |    |                                                                                                                                                                                                          |                    |
| Summary of evidence           | 24 | Summarize the main findings including the strength of evidence for each main outcome; consider their relevance to key groups (e.g., healthcare providers, users, and policy makers).                     | 7                  |
| Limitations                   | 25 | Discuss limitations at study and outcome level (e.g., risk of bias), and at review-level (e.g., incomplete retrieval of identified research, reporting bias).                                            | 8,9                |
| Conclusions                   | 26 | Provide a general interpretation of the results in the context of other evidence, and implications for future research.                                                                                  | 9,10               |
| <b>FUNDING</b>                |    |                                                                                                                                                                                                          |                    |
| Funding                       | 27 | Describe sources of funding for the systematic review and other support (e.g., supply of data); role of funders for the systematic review.                                                               | 1                  |

From: Moher D, Liberati A, Tetzlaff J, Altman DG, The PRISMA Group (2009). Preferred Reporting Items for Systematic Reviews and Meta-Analyses: The PRISMA Statement. PLoS Med 6(7): e1000097. doi:10.1371/journal.pmed1000097

For more information, visit: [www.prisma-statement.org](http://www.prisma-statement.org).

Page 2 of 2

For peer review only - <http://bmjopen.bmj.com/site/about/guidelines.xhtml>

# BMJ Open

## A systematic review and meta-analysis of diabetes mellitus, cardiovascular and respiratory condition epidemiology in sexual minority women.

|                                 |                                                                                                                                                                                                                                                                                                                                                   |
|---------------------------------|---------------------------------------------------------------------------------------------------------------------------------------------------------------------------------------------------------------------------------------------------------------------------------------------------------------------------------------------------|
| Journal:                        | <i>BMJ Open</i>                                                                                                                                                                                                                                                                                                                                   |
| Manuscript ID                   | bmjopen-2017-020776.R2                                                                                                                                                                                                                                                                                                                            |
| Article Type:                   | Research                                                                                                                                                                                                                                                                                                                                          |
| Date Submitted by the Author:   | 08-Mar-2018                                                                                                                                                                                                                                                                                                                                       |
| Complete List of Authors:       | Meads, Catherine; Anglia Ruskin University, Faculty of Health, Social Care and Education<br>Martin, Adam; Academic Unit of Health Economics, Leeds Institute of Health Sciences<br>Grierson, Jeffrey; Anglia Ruskin University, Faculty of Health, Social Care and Education<br>Varney, Justin; Public Health England, Adult Health and Wellbeing |
| <b>Primary Subject Heading</b>: | Epidemiology                                                                                                                                                                                                                                                                                                                                      |
| Secondary Subject Heading:      | Respiratory medicine, Diabetes and endocrinology, Cardiovascular medicine                                                                                                                                                                                                                                                                         |
| Keywords:                       | systematic review, meta-analysis, sexual minority women, Cardiac Epidemiology < CARDIOLOGY, Epidemiology < THORACIC MEDICINE                                                                                                                                                                                                                      |
|                                 |                                                                                                                                                                                                                                                                                                                                                   |

SCHOLARONE™  
Manuscripts

Only



1  
2  
3 Title: A systematic review and meta-analysis of diabetes mellitus, cardiovascular and respiratory  
4 condition epidemiology in sexual minority women.  
5

6  
7 Authors: Catherine Meads<sup>1</sup>, Adam Martin<sup>2</sup>, Jeffrey Grierson<sup>1</sup>, Justin Varney<sup>3</sup>  
8

9 Corresponding author: C Meads – email: catherine.meads@anglia.ac.uk  
10

11 1. Faculty of Health, Social Care and Education, Anglia Ruskin University, Cambridge, UK  
12

13 2. Academic Unit of Health Economics, Leeds Institute of Health Sciences, University of Leeds, Leeds,  
14 UK

15 3. Public Health England  
16  
17

18  
19 Acknowledgements: Professor Richard Riley for advice on conducting meta-analyses of adjusted  
20 odds ratios, Dr Brendon Stubbs for conducting the meta-analyses of adjusted odds ratios.  
21  
22

23  
24 Conflicts of interest: none  
25

26 Funding: Public Health England grant (£30,000) to RAND Europe for writing the full WSW best  
27 evidence review. The funder did not influence the conduct of the review.  
28

29 Word count: 3982  
30

31 Data sharing statement: No additional unpublished data as systematic review  
32

33 Contributorship statement: Justin Varney and Catherine Meads developed the research question.  
34 Catherine Meads and Adam Martin conducted the systematic review (searches, citation selection,  
35 data extraction, quality assessment). Catherine Meads wrote the systematic review and all data was  
36 checked by Adam Martin and Jeffrey Grierson. Catherine Meads conducted the meta-analysis,  
37 checked by Adam Martin. All authors edited the manuscript.  
38  
39  
40  
41  
42  
43  
44  
45  
46  
47  
48  
49  
50  
51  
52  
53  
54  
55  
56  
57  
58  
59  
60

## Abstract

### Objectives

Sexual minority women (SMW) experience higher chronic-disease risk-factors than heterosexual counterparts. However, it was unclear if these risks translate into higher physical-condition rates. This systematic review evaluates cardiovascular disease (CVD), hypertension, respiratory disease and diabetes mellitus in SMW.

### Methods

Prospero database registration: CRD42016050299. Included were studies reporting mortality, incidence or prevalence of the above listed conditions in SMW compared to heterosexual women. Databases (platforms) searched from 2010 to December 2016 were Medline (OVID), Embase (Elsevier), Cinahl (Elsevier), PsycInfo (Ovid), Social Policy and Practice (Ovid), Cochrane CENTRAL (Cochrane Library), Science Citation Index (Web of Science), CAB abstracts (Ovid). Search terms included MeSH terms and text words. Extensive additional searches were conducted in specialist academic journals and websites.

Two reviewers checked study eligibility. One independently extracted data and assessed quality, checked by a second, with disagreements resolved through discussion. The CASP cohort checklist was used to assess risk-of-bias. Meta-analysis was conducted where more than four studies reported same outcomes, with Comprehensive Meta-analysis software using adjusted odds ratios (AORs) and random-effects models. Heterogeneity was assessed using  $I^2$  test.

### Results

Identified were 23,103 citations, 692 full-texts screened, and 16 studies included (in 18 papers). One reported mortality (from Denmark), none incidence and 15 prevalence (14 USA, 1 Australia). Same-sex-cohabiting women had higher mortality rates compared to opposite-sex-cohabiting women in CVD (Hazard Ratio (HR)=1.37 (95%CI=1.22-1.54) and respiratory disease (HR=2.10 (95%CI=1.74-2.53). AOR meta-analyses of seven studies showed higher asthma rates in lesbians (OR=1.44 (95%CI=1.27-1.64) $I^2=0%$ ) and bisexual women (OR=1.64 (95%CI=1.41-1.89) $I^2=0%$ ) but no differences for CVD (five studies), hypertension (five studies) or diabetes mellitus (seven studies).

### Conclusions

These new health estimates require further confirmatory epidemiological studies, and investigation into potential environmental, hormonal, physiological, psychological or genetic causes. This would be supported by routine collection of sexual-identity measures in population-level epidemiological surveys.

### Strengths and limitations of this study

- A major strength is that this is the first numerical estimate of the relative prevalence of diabetes mellitus, cardiovascular and respiratory diseases in lesbians and bisexual women.
- We used extensive searches from a number of different sources, not just electronic databases and reference lists but also in specialist academic journals and websites to ensure we found all relevant studies.
- We used a wide definition of SMW to include identity, behaviour and partnership to be able to include all SMW irrespective of being sexually active or in a partnership. This will widen the generalizability of the systematic review.
- Considerable efforts were made to avoid double counting of participants from different studies when entering data but some double-counting may have occurred due to the nature of the surveys used in the studies.
- We used adjusted odds ratios to meta-analyse, which means that the results were more comparable than using unadjusted prevalence estimates. However, none of the AORs were adjusted for smoking status, which is a limitation of the included studies.

## Background

Sexual minority women (SMW) include lesbians, bisexual women, women who have sex with women, women who have sex with men and women, and women who are married to or cohabit with another woman in a committed relationship. Public Health England estimates that at least 2.5% of the population identify as lesbian, gay or bisexual<sup>1</sup>.

Chronic disease risk factors include poor diet, lack of exercise, obesity, smoking, excessive alcohol intake, anxiety, depression, hypertension and high cholesterol levels<sup>2,3,4</sup>. In general, SMW populations experience disproportionate behavioural risks to health and higher chronic disease risk factors than their heterosexual counterparts<sup>5,6</sup>. Due to a lack of research so far<sup>6</sup>, it is unclear whether these risk factors translate into higher rates of physical health conditions.

Past research has highlighted some aspects of health inequalities experienced by SMW but also identified significant and persistent gaps in the evidence<sup>5,7-10</sup> including in relation to common physical conditions such as cardiovascular disease (CVD), respiratory tract disease and diabetes mellitus. These are some of the leading causes of death and disability for women<sup>11</sup> and, up to now, there have been no published summary estimates of the relative prevalence of these conditions in SMW compared to heterosexual women.

There have been two recent systematic reviews of physical health in SMW<sup>12,13</sup>. Eliason (2015)<sup>12</sup> reviewed evidence on prevalence and risk of a variety of conditions and Simoni et al (2016)<sup>13</sup> investigated disparities in physical health conditions in SMW. Since these systematic reviews were conducted, more prevalence studies have been published. This systematic review includes all relevant recent evidence (published from 2010 onwards) on the mortality, incidence and prevalence of specific physical health conditions of CVD, hypertension, respiratory disease and diabetes mellitus in SMW compared to heterosexual women, and conducts meta-analyses in order to derive up-to-date prevalence estimates of these conditions and determine whether there are different rates in SMW compared to heterosexual women.

## Methods

A protocol was registered with the Prospero database (No. CRD42016050299) for research investigating all aspects of health and experience of healthcare in SMW, of which this project is part. Patients and the public were not involved with the design or conduct of this systematic review. The inclusion criteria for this systematic review were any published comparative studies in any language, published from 2010 onwards, comparing specific rates (see below) in SMW (any definition including identity, behaviour or cohabitation status) of any age compared to heterosexual women (any definition including identity, behaviour or cohabitation status) of any age in any country or setting. The following self-report or objectively measured rates were included: mortality, incidence and prevalence of CVD, hypertension, diabetes mellitus (any type) and respiratory diseases including asthma.

### Searches:

Database searches were conducted in two phases. First, searches were conducted by Public Health England Knowledge and Library Service in May 2015. Second, searches were conducted by the first author (CM) in December 2016 with dates from January 2015 to December 2016. Databases (platforms) searched were Medline (OVID), Embase (Elsevier), Cinahl (Elsevier), PsycINFO (Ovid), Social Policy and Practice (Ovid), Cochrane CENTRAL (Cochrane Library), Science Citation Index (Web

of Science), CAB abstracts (Ovid). EPPI-Reviewer 4, Endnote and Microsoft Excel were used to sift citations. Search terms included MeSH terms and text words for sexual minority (for example, lesbian, bisexual, homosexual, WSW, WSMW, same sex). We then searched a large number of full texts for the physical conditions listed above. Searches were not limited to English language. Example search strategies for 4 databases from the December 2016 searches are in Web Supplement 1.

In addition to database searches, reviews and summaries of lesbian, gay, bisexual & transgender (LGB&T) health were examined for relevant evidence. LGB&T Health Research Journal (all issues), Journal of Lesbian Studies (2014-16) and Journal of Gay and Lesbian Mental Health (2014-16) were searched. Previous projects by the first author (CM) were searched for relevant evidence and, from a previous project, a list of currently active researchers in LGBT health with their publications were reviewed. Web pages of several researchers known to be active in SMW research were searched. The UK National LGB&T Partnership monthly newsletter from February to October 2016 was sifted for relevant up-to-date work that had not yet been published. UK national survey websites were also sifted for information on sexual identity and health (Integrated Household Survey, Scottish Health Survey, Welsh Health Survey and Health Survey for England).

## Study selection, data extraction, quality assessment and synthesis

Full text copies of references matching inclusion criteria were obtained. Two reviewers (CM and AM) checked study eligibility. One independently extracted data from studies into the report (CM) and these were checked by another reviewer (JG), with disagreements resolved through discussion. Characteristics and results of all included studies were described through narrative synthesis. Tabulation was used where there was more than one study reporting the same outcome. Where there was overlap in study populations, the largest included population was used where outcomes of interest were reported. The Critical Appraisal Skills Programme (CASP) checklist for cohort studies was used to assess quality for all studies. Since there is no established and validated quality checklist specifically for cross-sectional surveys, using the same checklist for all provided consistency in quality assessment across studies. Meta-analysis was conducted where there were four or more discrete studies reporting the same outcome. This included both unadjusted prevalence estimates (with Review Manager software 5.3), and adjusted odds ratios using inverse variance (with Comprehensive Meta-analysis version 3). Random effects models were used for both. Statistical heterogeneity was assessed using the  $I^2$  test, using standard thresholds for high, medium and low heterogeneity<sup>14</sup>. There were insufficient studies reporting the same outcomes to be able to construct a meaningful funnel plot to assess publication bias.

## Results

### Description of studies

A total of 23,103 citations were identified, 22,763 from the first searches and 340 from the second searches (see Web Figure 1). Full texts of 692 papers were screened for potential relevancy. Sixteen studies were included<sup>15-30</sup>, described in 18 papers - the study by Clark et al (2015)<sup>31</sup> contained a subset of the participants in the study by Everett et al (2013)<sup>20</sup> and the study by Wallace (2011)<sup>32</sup> contained a subset of those in the study by Boehmer et al (2014)<sup>17</sup>. For characteristics of included studies, see Table 1 and for participant baseline characteristics, see Web Appendix Table 1.

1  
2  
3 One study examined mortality rates; Frisch and Simonsen (2013)<sup>24</sup> reported hazard ratios for  
4 mortality by sexual orientation in a large national cohort from Denmark by various causes of death  
5 (n=6.5 million, approximately 50% women).

6  
7 No studies investigated incidence, and 15 studies investigated prevalence<sup>13-23, 25-30</sup>. Two were based  
8 on single waves of cohort studies (Everett et al 2013<sup>20</sup> (also reported in Clarke et al 2015<sup>31</sup>), and  
9 McNair et al 2011<sup>29</sup>). The first<sup>20</sup> was based in the USA and used Wave IV of data from the National  
10 Longitudinal Study of Adolescent Health. The second<sup>29</sup> used one year's data from an Australian study  
11 of young women aged 18-23 selected at random from the Australian Medicare database. The  
12 remaining 13 studies were from the USA and used one or more year's data from repeated cross  
13 sectional surveys. Eight of these used Behavioral Risk Factor Surveillance System (BRFSS) surveys,  
14 either using a national sample from different years<sup>15,16</sup> or for specific states (Massachusetts<sup>18</sup>,  
15 Oregon<sup>25</sup>, North Carolina<sup>28</sup>, Washington State<sup>19,22,23</sup>). Other surveys used included; The National  
16 Health Interview Survey<sup>26,30</sup>, The California Health Interview Survey<sup>17,32</sup>, The Youth Risk Behaviour  
17 Surveillance System<sup>27</sup>, The National Health and Nutrition Examination Survey<sup>21</sup>.

18  
19  
20 One group of studies<sup>19,22,23</sup> reported different outcomes for different subsets (such as age ranges) of  
21 the same repeated survey for different years. Ward et al (2015)<sup>30</sup> investigated a subset of the  
22 population in Jackson et al (2016)<sup>26</sup> but Ward et al (2015)<sup>30</sup> reported asthma whereas Jackson et al  
23 (2016)<sup>26</sup> did not so both papers for this study have been included. Wallace et al (2011)<sup>32</sup> used a  
24 subset of the sample in Boehmer et al (2014)<sup>17</sup> and reported the same outcomes so these results are  
25 not reported here. Everett et al (2013)<sup>20</sup> and Clark et al (2015)<sup>31</sup> reported different outcomes from  
26 the same population so both papers for this study have been included.

27  
28  
29 Quality assessment found similar quality issues across studies, and are reported in Web Appendix  
30 Table 2. The cohort studies<sup>20,29</sup> reported results as if they were cross-sectional surveys by not using  
31 follow-up data. The main quality issues were that health conditions were ascertained mostly by  
32 health self-report; the main exception was in Everett et al 2013 (and Clark et al 2015)<sup>20,31</sup> where  
33 interviewers measured blood pressure. Also, weighted prevalence percentages were reported in  
34 several included studies (see Web Appendix Table 1), but weighting factors used were often unclear.

## 35 36 Main findings

37 For CVD mortality and for respiratory tract disease mortality, Frisch and Simonsen (2013)<sup>24</sup> found  
38 that same-sex cohabiting women had higher mortality rates to opposite sex cohabiting women for  
39 these diseases (HR 1.37 (95%CI 1.22 to 1.54) and HR 2.10 (95%CI 1.74 to 2.53) respectively) but that  
40 same-sex married women had similar mortality rates to opposite sex married women (HR 1.32  
41 (95%CI 0.75 to 2.33) and HR 0.85 (95%CI 0.36 to 2.05) respectively) . The sample sizes were larger for  
42 same-sex cohabiting women (n=207 and n=111) than same sex married women (n=12 and n=5) and  
43 no conclusions can be drawn from the same sex married women data as sample sizes were too  
44 small.

45  
46  
47 Numerical prevalence results are presented in Table 2 (asthma), Web Appendix Table 3 (CVD), Web  
48 Appendix Table 4 (hypertension), and Web Appendix Table 5 (diabetes mellitus). They demonstrate  
49 that the way these rates were reported varied across the studies, for example some studies  
50 presented results for SMW compared to heterosexual women whereas others presented results  
51 separately for lesbians and for bisexual women. Percentages of women with conditions varied across  
52 the studies, most notably hypertension which varied from 14.7%<sup>21</sup> to 65.3%<sup>17</sup> in heterosexual  
53 women. Most studies presented AORs as well as the adjusted or unadjusted percentages but fewer  
54 gave measures of spread such as 95% CIs or standard errors (SEs). One study<sup>26</sup> presented results for  
55 heart disease and stroke separately and found no difference in rates between any of the groups (see  
56  
57

Web Appendix Table 3). One study<sup>30</sup> presented results for chronic obstructive pulmonary disease which found higher rates in bisexual women compared to heterosexual women but not for lesbians (prevalence in lesbians 6.0% (95%CI 3.2 to 11.0), bisexual women 13.6% (95%CI 6.9 to 25.2), heterosexual women 6.4% (95%CI 5.9 to 6.8).

## Meta-analysis

There were sufficient studies (i.e.  $n > 4$ ) presenting results for CVD, hypertension, asthma and diabetes (any type) in lesbians and in bisexual women for meta-analyses to be conducted.

Meta-analyses of unadjusted prevalence (see figure 1, Web Figure 2a, 2b, 3a, 3b, 4a, 4b) showed no difference in CVD (lesbian OR=0.94 (95%CI 0.73 to 1.21) and bisexual women OR=0.90 (95%CI 0.54 to 1.51)) but lower prevalence of hypertension (lesbian OR=0.82 (95%CI 0.72 to 0.94) and bisexual women OR=0.64 (95%CI 0.49 to 0.85)). There was higher prevalence of asthma (lesbians OR=1.47 (95%CI 1.32 to 1.63) and bisexual women OR=1.97 (95%CI 1.71 to 2.26) and combined for all SMW OR=1.68 (95%CI 1.52 to 1.85)). For diabetes mellitus there was no difference in prevalence between lesbians and heterosexual women but lower prevalence in bisexual women (OR=0.86 (95%CI 0.65 to 1.12) and OR=0.70 (95%CI 0.54 to 0.91)).

Meta-analyses of adjusted odds ratios (all adjusted for age) showed increased rates of asthma in lesbians and in bisexual women compared to heterosexual women (ORs = 1.44 (95%CI 1.27 to 1.64)  $I^2=0\%$  and 1.64 (95%CI 1.41 to 1.89)  $I^2=0\%$ ). They showed no differences for lesbians or bisexual women compared to heterosexual women for CVD (ORs = 1.34 (95%CI 0.97 to 1.85)  $I^2=45\%$  and 1.08 (95%CI 0.80 to 1.47)  $I^2=0\%$ ), for hypertension (ORs = 0.98 (95%CI 0.86 to 1.14)  $I^2=0\%$  and 1.08 (95%CI 0.86 to 1.35)  $I^2=39\%$ ), and for diabetes mellitus (ORs = 1.11 (95%CI 0.91 to 1.36)  $I^2=0\%$  and 1.01 (95%CI 0.75 to 1.36)  $I^2=51\%$ ).

## Discussion

### Summary of main findings

Results from a single large study reporting mortality rates<sup>24</sup> showed that there was no difference in cardiovascular or respiratory tract disease mortality rates in same-sex married compared to opposite sex married women, but higher mortality rates in same-sex cohabiting women compared to opposite sex cohabiting women.

Meta-analyses of adjusted odds ratios of disease prevalence showed no differences in CVD, hypertension or diabetes mellitus prevalence, but a higher prevalence of asthma in SMW compared to heterosexual women.

### Discussion of main findings

A key finding was the higher prevalence, from the adjusted odds ratio meta-analysis, of asthma in lesbians and bisexual women. Asthma is caused by a mixture of genetic and environmental factors. Higher rates are associated with anxiety but it is not known if asthma causes psychological problems or if psychological problems lead to asthma<sup>33</sup>. Nevertheless, studies have shown higher rates of mental health problems including anxiety in SMW<sup>34,35</sup>. Asthma is also more common amongst those who are economically disadvantaged, and a consistent finding in studies included in the systematic review was that SMW had below average incomes<sup>15-17,21,29</sup>. Asthma is also more common amongst current or former smokers. Several included studies showed higher rates of smoking or tobacco use amongst SMW<sup>15,16,19-21,23,25,26,28</sup>. However, only one of the studies reporting asthma prevalence clearly controlled for smoking behaviour<sup>15</sup>.

1  
2  
3 The finding of lower hypertension prevalence and no difference in the adjusted odds ratio meta-  
4 analysis in lesbians and bisexual women was unexpected. Higher rates of hypertension are  
5 associated with lack of exercise and obesity. Several of the included studies demonstrated higher  
6 rates of obesity<sup>15-18,20-22,25,26</sup> and a recent systematic review on obesity in SMW<sup>36</sup> also found  
7 consistently higher rates of obesity amongst SMW compared to heterosexual women. However, the  
8 rates of physical exercise in SMW is less clear. Two of the included studies showed higher rates of  
9 physical activity or exercise in lesbians and bisexual women compared to heterosexual women<sup>16,28</sup>  
10 whilst four showed no differences<sup>20,22,25,26</sup>. Hypertension is also associated with mental health  
11 difficulties, particularly depression<sup>37</sup>, and there are higher rates of depression in SMW<sup>34,35</sup>.

12  
13  
14 No difference in rates of diabetes mellitus were found in the meta-analysis of adjusted odds ratios,  
15 but in the unadjusted prevalence meta-analysis higher rates were found in bisexual women but not  
16 lesbians. It is unclear as to why this would occur. Risk factors for type II diabetes mellitus include  
17 hypertension, overweight/obesity, physical inactivity and unhealthy diet. Evidence on the first three  
18 are discussed above, however there is much less information available about diet. Dilley et al 2010<sup>19</sup>  
19 reported that the proportion eating insufficient fruits and vegetables was higher in bisexual women  
20 than lesbians and heterosexual women but Garland-Forshee et al 2014<sup>25</sup> showed no differences  
21 between lesbians, bisexual and heterosexual women in the proportion who met US CDC  
22 recommendations on fruit and vegetable intake.

23  
24 Three of the included studies calculated that lesbians and bisexual women were at higher risk of  
25 CVD<sup>18,21,31</sup>. Farmer et al (2013)<sup>21</sup> and Clark et al (2015)<sup>31</sup> calculated risk scores using the Framingham  
26 General CVD Risk Score and both calculated that SMW had higher CVD risk scores. Farmer et al  
27 (2013)<sup>21</sup> calculated that SMW were 13.9% (95%CI 8.55 to 19.3%) older in vascular terms than their  
28 chronological age, and that this was 5.7% (95%CI 1.5% to 9.8%) greater than heterosexual women.  
29 Clark et al (2015)<sup>31</sup> found that average 30 year CVD risk was raised in all sexual minority groups of  
30 women, significantly so in mostly heterosexual and mostly homosexual women. Conron et al  
31 (2010)<sup>18</sup> also calculated CVD risk, using presence of obesity and smoking plus one other risk factor  
32 including lack of moderate physical activity, lifetime diabetes mellitus, hypertension and high  
33 cholesterol. They estimated that lesbians and bisexual women were at higher risk of CVD than  
34 heterosexual women.

35  
36  
37 It is known that there are higher rates of several CVD risk factors in SMW, including  
38 overweight/obesity, diabetes mellitus, tobacco use (all discussed above) high cholesterol and  
39 harmful use of alcohol (discussed below). Hence the finding of no difference in CVD rates was  
40 surprising. Also, since the systematic review found higher rates of asthma, if this was due to higher  
41 rates of smoking, it would be expected that there would be correspondingly higher rates of CVD.

42  
43  
44 Several of the included studies reported higher rates of harmful alcohol use in lesbians and bisexual  
45 women compared to heterosexuals<sup>16,19-21,23,25,26</sup>. Several also reported cholesterol levels - one found  
46 lower cholesterol levels in lesbians and bisexual women<sup>20</sup> but most found no significant  
47 differences<sup>19,23,25</sup>. Matthews et al, 2014<sup>28</sup> found that twice as many lesbians and bisexual women  
48 than heterosexual women were not having their cholesterol checked (32.5% vs 13.8%), but the  
49 implications of this are unclear.

### 50 51 **Strengths and weaknesses of the study**

52  
53 The strengths of the current systematic review include extensive searches from a number of  
54 different sources, a minor weakness is that the searches were conducted to December 2016 and  
55 more studies may have been published since then. We used a wide definition of SMW to include  
56



1  
2  
3 identity, behaviour and partnership. It is acknowledged that these are different concepts and  
4 women can identify as lesbian or bisexual without being sexually active or being in a partnership.  
5 Also some women identify as lesbian whilst having sex with men and some women identify as  
6 heterosexual whilst having sex with women. Most of the studies also used self-report for the  
7 physical conditions, and this may result in responder bias, but it is unclear why responder bias might  
8 be stronger in SMW than heterosexual respondents. Also, almost all of the included studies were  
9 conducted in USA, so results may not be generalizable to other countries. Also, it is known that SMW  
10 have less insurance coverage and poorer access to healthcare in USA<sup>38</sup>. The precise questions on  
11 health used in the BRFSS questionnaires asked whether the respondent had been 'told by a health  
12 care professional' that they had had the named condition. If SMW have less access to healthcare, it  
13 could be assumed that fewer would have been told they had one of the conditions investigated  
14 here. So it is possible that all of the rates may have been underestimated, and the increased rates of  
15 asthma may be even higher than found here. In the reported results, prevalence of physical  
16 conditions were weighted to better reflect the underlying population in some of the included studies  
17 but not in others. Where the sexual minority samples were younger than the heterosexual  
18 population with which they were compared, it might be expected that the lack of weighting by age  
19 would result in underestimation of the difference in prevalence of physical health conditions,  
20 particularly CVD, hypertension and diabetes mellitus where prevalence rises by age. There were  
21 insufficient studies to be able to conduct meaningful subgroup analyses by whether or not the study  
22 had controlled for age. Furthermore, two of the studies<sup>16,23</sup> were unclear as to whether they  
23 weighted the reported prevalence or whether the reported weighting factors referred to the  
24 adjusted odds ratios that they also report. Some of the studies weighted by factors such as  
25 education and income which may also impact on the estimated prevalence of physical conditions.  
26 Some important factors were often not controlled for, e.g. for asthma, it would be usual to include  
27 smoking rates, which differ between SMW and heterosexual female populations. A further major  
28 limitation is that almost all of the prevalence research was from USA so it is currently unclear if the  
29 findings are generalizable to other countries.  
30  
31  
32  
33

34 In the meta-analyses, considerable efforts were made to avoid double counting of participants from  
35 different studies when entering data and hence some studies were excluded for one or more  
36 reported outcomes<sup>19,23,31,32</sup>. Random effects models were used because of clinical heterogeneity of  
37 the study samples. The heterogeneity between studies in the weightings that were used for the  
38 prevalence estimates in the unadjusted meta-analyses may have introduced some bias from this loss  
39 of information about differences between the two groups. Hence there may be some inconsistency  
40 between the AORs reported in the results tables and the ORs used in the meta-analysis. The meta-  
41 analyses of AORs mitigates some of these effects, and all AORs used were adjusted for age.  
42 However, in both types of meta-analyses, there was heterogeneity in outcome measures (e.g. one  
43 study measured hypertension, six using self-report hypertension and one study using hypertensive  
44 medication use), although we do not expect that this impacted on the observed differences between  
45 groups, our main outcome of interest.  
46  
47

#### 48 **Strengths and weaknesses in relation to previous research**

49  
50 The previous systematic reviews<sup>12,13</sup> found fewer studies and did not conduct meta-analyses so did  
51 not quantify the physical health disparities they had found. For CVD prevalence Eliason (2014)<sup>12</sup>  
52 included seven studies, of which four were published before 2010, and for hypertension it included  
53 12 studies, of which four were published before 2010. For asthma it included 13 studies, four of  
54 which were published before 2010. Some relevant results from included studies were not described,  
55 and the study by Garland-Forshee et al 2014<sup>24</sup> was omitted. Eliason (2014)<sup>12</sup> concluded that asthma  
56  
57  
58  
59  
60

1  
2  
3 was more common in SMW, but no differences were consistently found in the other chronic physical  
4 conditions she investigated, including diabetes, hypertension and CVD. Simoni et al (2016)<sup>13</sup> had a  
5 very brief summary of results. For CVD it found one study, for hypertension one study and for  
6 asthma four studies. All of these were included in the systematic review by Eliason (2015)<sup>12</sup>. Simoni  
7 et al (2016)<sup>13</sup> found evidence of disparities in the one included study reporting CVD<sup>22</sup> and in asthma,  
8 but that evidence was lacking in diabetes and hypertension. There is also little information on the  
9 prevalence of these conditions in men according to sexual orientation and no relevant systematic  
10 reviews<sup>10</sup>.  
11

### 12 **Implications for clinicians and policy-makers**

14 If there are higher rates of asthma in lesbians and bisexual women, this might have implications for  
15 health service delivery, particularly in primary care. Urwin and Whittaker (2016)<sup>39</sup> published an  
16 evaluation of the English General Practice Patient Survey (n=2,807,320 in total, 1,556,909 women)  
17 looking at inequalities of GP use by sexual orientation for various conditions. They found that  
18 lesbians but not bisexual women were less likely to visit the GP than heterosexual women in the  
19 previous 3 months for asthma or long-term chest problem (adjusted OR=0.84 (95%CI 0.71 to 0.98  
20 and OR=0.85 (95%CI 0.69 to 1.04)). So it is likely that SMW, particularly in the UK and possibly  
21 elsewhere, are not accessing services despite ill-health. A recent systematic review found that sexual  
22 minority populations generally have difficulties with access to health services for a variety of reasons  
23 including communication difficulties, internalized homophobia, prejudicial conduct adopted by  
24 health professionals, breach of confidentiality during consultations and institutional homophobia<sup>40</sup>.  
25 Combined with the evidence shown in this systematic review, this suggests potentially considerable  
26 latent demand for primary care services amongst SMW and that there may be particular issues for  
27 lesbians accessing primary health care services for asthma. This evidence contributes to a bigger  
28 picture about inequality for SMW in a wide range of aspects<sup>5,8</sup>.  
29  
30  
31

32 This systematic review highlights the need for better routine data collection on sexual minority  
33 women as much of the current research has small sample sizes and based on countries with  
34 significantly different healthcare access and social norms around sexual identity. The introduction of  
35 an NHS information standard on sexual orientation in April 2017<sup>41</sup> will start to introduce routine data  
36 capture across hospital episode statistics and disease registries, alongside training across the NHS to  
37 support staff having positive conversations about sexual orientation, which will build over time a  
38 much clearer picture of the health inequalities in this group and potentially help to reduce them.  
39  
40

### 41 **Implications for research**

42 This rigorously conducted systematic review has reported some important new findings on health  
43 inequalities in SMW that are hard to explain. Further research would be useful on these health  
44 inequalities, including their causes. This would be supported by the routine collection of sexual  
45 identity measures in population-level epidemiological studies, and the results published. Robust  
46 multi-level modelling (including sexual identity) should be conducted with large databases and  
47 cohort studies. For asthma, results from large cohort studies, controlled for risk factors such as  
48 smoking and overweight/obesity would be useful to further examine these findings. Regarding  
49 hypertension and CVD, the findings are also unexpected so investigation into potential causes would  
50 be very useful, such as possible differences in hormone levels, or other environmental, social,  
51 physiological, psychological or genetic factors that might be contributing to these results.  
52  
53  
54  
55  
56  
57  
58  
59  
60

## References

1. Public Health England. Producing modelled estimates of the size of the lesbian, gay and bisexual (LGB) population of England. 2016  
[https://www.gov.uk/government/uploads/system/uploads/attachment\\_data/file/585349/PE\\_Final\\_report\\_FINAL\\_DRAFT\\_14.12.2016NB230117v2.pdf](https://www.gov.uk/government/uploads/system/uploads/attachment_data/file/585349/PE_Final_report_FINAL_DRAFT_14.12.2016NB230117v2.pdf)
2. Newton JN, Briggs AD, Murray CJ, Dicker D, Foreman KJ, Wang H, Met al. Changes in health in England, with analysis by English regions and areas of deprivation, 1990–2013: a systematic analysis for the Global Burden of Disease Study 2013. *Lancet* 2015; 386: 2257–74
3. Bhattacharya R, Shen C, Sambamoorthi U. Excess risk of chronic physical conditions associated with depression and anxiety. *BMC Psychiatry* 2014, 14:10
4. Clarke DM, Currie KC. Depression, anxiety and their relationship with chronic diseases: a review of the epidemiology, risk and treatment evidence. *Medical Journal of Australia* 2009;190(7 Supp):S54-S60.
5. Committee on Lesbian, Gay, Bisexual and Transgender Health Issues and Research Gaps and Opportunities. The health of lesbian, gay, bisexual and transgender (LGBT) people: building a foundation for better understanding; Board on the Health of Select Populations; Institute of Medicine, The National Academy of Science. Washington DC, 2011.
6. Coulter RW, Kenst KS, Bowen DJ, Scout S. Research funded by the National Institutes of Health on the health of the lesbian, gay, bisexual and transgender populations. *American Journal of Public Health* 2014;104(2):e105-12
7. Meads C, Pennant M, McManus J, Bayliss S. A systematic review of lesbian, gay, bisexual and transgender health in the West Midlands region of the UK compared to published UK research. University of Birmingham: Birmingham 2009  
<http://www.birmingham.ac.uk/Documents/collegemds/haps/projects/WMHTAC/REPreports/2009/LGBThealth030409finalversion.pdf>
8. Hudson-Sharp N, Metcalf H. Inequality among lesbian, gay bisexual and transgender groups in the UK: a review of evidence. National Institute of Economic and Social Research, London 2016
9. Edmondson D, Hodges R, Williams H. The lesbian, gay, bisexual and trans public health outcomes framework companion document, 2016 update. National LGB&T Partnership, 2016
10. Blondeel K, Say L, Chou D, Toskin R, Khosla R, Scolaro E, et al. Evidence and knowledge gaps on the disease burden in sexual and gender minorities: a review of systematic reviews. *International Journal for Equity in Health* 2016;15:16
11. Wang H, Naghavi M, Allen C, Barber RM, Bhutta Z, Carter A et al. Global, regional, and national life expectancy, all-cause mortality, and cause-specific mortality for 249 causes of death, 1980–2015: a systematic analysis for the Global Burden of Disease Study 2015. *Lancet* 2016;388(10053):1459–1544
12. Eliason M. Chronic Physical Health Problems in Sexual Minority Women: Review of the Literature. *LGBT Health*. 2015;1(4):259-69
13. Simoni J, Smith L, Oost KM, Lehavot K, Fredriksen-Goldsen K ( ): Disparities in Physical Health Conditions Among Lesbian and Bisexual Women: A Systematic Review of Population-Based Studies, *Journal of Homosexuality* 2016, DOI: 10.1080/00918369.2016.1174021
14. Higgins G, Green S (eds). *Cochrane Handbook of systematic reviews of interventions*. Wiley-Blackwell, Chichester, 2008

15. Blosnich JR, Lee JG, Bossarte R, Silenzio VM. Asthma disparities and within-group differences in a national probability sample of same-sex partnered adults. *American Journal of Public Health* 2013;103(9):e83-7
16. Blosnich JR, Farmer GW, Lee JG, Silenzio VM, Bowen DJ. Health inequalities among sexual minority adults: Evidence from ten U.S. states 2010. *American Journal of Preventive medicine* 2014;46(4):337-49
17. Boehmer U, Miao X, Linkletter C, Clark MA. Health conditions in younger, middle and older ages: are there differences by sexual orientation? *LGBT Health* 2014;1(3):168-76
18. Conron KJ, Mimiaga MJ, Landers SJ. A population-based study of sexual orientation identity and gender differences in adult health. *American Journal of Public Health*. 2010;100:1953–1960
19. Dilley JA, Simmons KW, Boysun MJ, Pizacani BA, Stark MJ. Demonstrating the importance and feasibility of including sexual orientation in public health surveys: Health disparities in the Pacific Northwest. *American Journal of Public Health* 2010;100(3):460-7
20. Everett B, Mollborn S. Differences in hypertension by sexual orientation among U.S. young adults. *Journal of community Health* 2013;38:588-96
21. Farmer GW, Jabson JM, Bucholz KK, Bowen DJ. A Population-Based Study of Cardiovascular Disease Risk in Sexual-Minority Women. *American Journal of Public Health*. 2013;103:1845–1850
22. Fredriksen-Goldsen KI, Kim H-J, Barkan SE. Disability among Lesbian, Gay, and Bisexual Adults: Disparities in Prevalence and Risk *American Journal of Public Health*. 2012;102: e16–e21.
23. Fredriksen-Goldsen KI, Kim H-J, Barkan SE, Muraco A, Hoy-Ellis CP. Health disparities among lesbian, gay and bisexual older adults: results from a population-based study. *American Journal of Public Health* 2013;103(10):1802-9
24. Frisch M, Simonsen J. Marriage, cohabitation and mortality in Denmark: national cohort study of 6.5 million persons followed for up to three decades (1982–2011). *International Journal of Epidemiology* 2013;42:559–578
25. Garland-Forshee RY, Fiala SC, Ngo DL, Moseley K. Sexual orientation and sex differences in adult chronic conditions, health risk factors, and protective health practices, Oregon, 2005–2008. *Preventing Chronic Disease* 2014;11:140126.
26. Jackson CL, Agenor M, Johnson DA, Bryn Austin S, Kawachi I. Sexual orientation identity disparities in health behaviors, outcomes, and services use among men and women in the United States: a cross-sectional study. *BMC Public Health* (2016) 16:807
27. Kann L, O'Malley Olsen E, McManus T, Harris WA, Shanklin SL, Flint KH, Queen B, Lowry R, Chven D, Whittle L, Thornton J, Lim C, Yanakawa Y, Brener N, Zaza S. Sexual Identity, Sex of Sexual Contacts, and Health-Related Behaviors Among Students in Grades 9–12 – United States and Selected Sites, 2015. *MMWR*;2016;65(9):1-202
28. Matthews DD, Lee JG. A profile of North Carolina lesbian, gay and bisexual health disparities 2011. *American Journal of Public Health* 2014;104(6):e98-e105
29. McNair R, Hegarty K. Guidelines for the Primary Care of Lesbian, Gay, and Bisexual People: A Systematic Review. *Annals of Family Medicine* 2010;8:533-541
30. Ward BW, Joestl SS, Galinsky AM, Dahlhamer JM. Selected Diagnosed Chronic Conditions by Sexual Orientation: A National Study of US Adults, 2013. *Preventing Chronic Disease* 2015;12:150292
31. Clark CJ, Borowsky IW, Salisbury J, Usher J, Spencer RA, Przedworski JM, Renner LM, Fisher C, Everson-Rose SA. Disparities in long-term cardiovascular disease risk by sexual identity:

- 1  
2  
3 The National Longitudinal Study of Adolescent to Adult Health. *Preventive Medicine*  
4 2015;76:26-30
- 5 32. Wallace SP, Cochran SD, Durazo EM, Ford CL. The health of aging lesbian, gay and bisexual  
6 adults in California. Los Angeles. UCLA Center for Health Policy Research 2011.
- 7 33. Thomas M; Bruton A; Moffat M; Cleland J. Asthma and psychological dysfunction. *Primary*  
8 *Care Respiratory Journal: Journal of the General Practice Airways Group.* 2011;20 (3): 250–6
- 9 34. Semlyen J, King M, Varney J, Hagger-Johnson G. Sexual orientation and symptoms of  
10 common mental disorder or low wellbeing: combined meta-analysis of 12 UK population  
11 health surveys. *BMC Psychiatry* 2016;16:67
- 12 35. King M, Semlyen J, See Tai S, Killaspy H, Osborn D, Popelyuk D, Nazareth I. A systematic  
13 review of mental disorder, suicide, and deliberate self harm in lesbian, gay and bisexual  
14 people. *BMC Psychiatry* 2008;8:70
- 15 36. Eliason MJ, Ingraham N, Fogel, SC, McElroy JA, Lorvick J, Mauery DR, Haynes S. A systematic  
16 review of the literature on weight in sexual minority women. *Women's Health Issues*  
17 2015;25(2): 162–175
- 18 37. Meng L; Chen D; Yang Y; Zheng Y; Hui R. Depression increases the risk of hypertension  
19 incidence: a meta-analysis of prospective cohort studies. *Journal of Hypertension.*  
20 2012;30(5):842–51.
- 21 38. Dahlhamer JM, Galinsky AM, Joestl SS, Ward BW. Barriers to Health Care Among Adults  
22 Identifying as Sexual Minorities: A US National Study, *American Journal of Public Health*  
23 2016;106(6):1116-1122.
- 24 39. Urwin S, Whittaker W. Inequalities in family practitioner use by sexual orientation: evidence  
25 from the English General Practice Patient Survey. *BMJ Open* 2016;6:e011633
- 26 40. Alencar Albuquerque G, de Lima Garcia C, da Silva Quirino G, et al. Access to health services  
27 by lesbian, gay, bisexual, and transgender persons: systematic literature review. *BMC*  
28 *International Health and Human Rights.* 2016;16:2. doi:10.1186/s12914-015-0072-9.
- 29 41. Standardisation Committee for Care Information (SCCI). Advance Notification – New  
30 Information Standard.  
31 <http://content.digital.nhs.uk/media/22530/2094512015an/pdf/2094512015an.pdf> accessed  
32 March 2017
- 33  
34  
35  
36  
37  
38  
39  
40  
41  
42  
43  
44  
45  
46  
47  
48  
49  
50  
51  
52  
53  
54  
55  
56  
57  
58  
59  
60

## Tables and figures, with web appendix

Table 1. Characteristics of included studies.

Table 2. Prevalence of asthma by sexual orientation

Figure 1. Subgroup meta-analysis of asthma in lesbians, bisexual women and SMW

### WEB APPENDIX

Web Supplement 1. – Search strategies

Web Table 1. Participant baseline characteristics

Web Table 2. CASP quality assessment results

Web Table 3. Prevalence of cardiovascular disease or CVD symptoms by sexual orientation

Web Table 4. Prevalence of hypertension or hypertensive medication use by sexual orientation

Web Table 5. Prevalence of any type of diabetes mellitus by sexual orientation

Web Figure 1. PRISMA flow diagram

Web Figure 2a. CVD in lesbians

Web Figure 2b, CVD in bisexual women

Web Figure 3a. Hypertension in lesbians

Web Figure 3b. Hypertension in bisexual women

Web Figure 4a. Diabetes mellitus in lesbians

Web Figure 4b. Diabetes mellitus in bisexual women

Table 1. Characteristics of included studies

| First author (year)                                                                    | Survey method, Exposure                                                                                                                  | Population, setting, country                                                                                                            | Sexual orientation/behaviour question                                                                                                                           | Comparison                          | Recruitment, data collection                                               | Outcomes of interest*           | Study design, funding                                             |
|----------------------------------------------------------------------------------------|------------------------------------------------------------------------------------------------------------------------------------------|-----------------------------------------------------------------------------------------------------------------------------------------|-----------------------------------------------------------------------------------------------------------------------------------------------------------------|-------------------------------------|----------------------------------------------------------------------------|---------------------------------|-------------------------------------------------------------------|
| <b>Mortality studies</b>                                                               |                                                                                                                                          |                                                                                                                                         |                                                                                                                                                                 |                                     |                                                                            |                                 |                                                                   |
| Frisch (2013)                                                                          | National demographic data from Danish Civil Registration System, including mortality data                                                | Population, marriage, living in same sex or opposite sex cohabitation for at least 1 year between 1982 and 2011, Denmark                | Cohabitation record, marriage record (same sex marriage from 1989, (NB 75.6% same sex cohabiting women were same sex married)                                   | Opposite sex cohabitation, marriage | National demographic data collection                                       | Mortality                       | Population cohort Supported by – not reported (NR)                |
| <b>Surveys based on multi-state Behavioral Risk Factor Surveillance System (BRFSS)</b> |                                                                                                                                          |                                                                                                                                         |                                                                                                                                                                 |                                     |                                                                            |                                 |                                                                   |
| Blosnich (2013)                                                                        | Telephone-based (landline) random digit dialled interview. Had ever been told by a health professional that they had (a named condition) | English or Spanish speaking non-institutionalized adults in partnerships. All states, USA                                               | Various similar in the 10 states with response options heterosexual or straight; homosexual, gay or lesbian; bisexual; other; and opposite or same sex partner. | Opposite sex partnered women        | Behavioral Risk Factor Surveillance System (BRFSS) for all US States 2004. | Current asthma, lifetime asthma | Population survey. Supported by a National Research Service award |
| Blosnich (2014)                                                                        | Telephone-based (landline) random digit dialled interview. Had ever been told by a health professional that they had (a named condition) | English or Spanish speaking non-institutionalized adults. Alaska, Arizona, California, Maine, Massachusetts, Montana, New Mexico, North | Various similar in the 10 states with response options heterosexual or straight; homosexual, gay or lesbian; bisexual; other.                                   | Heterosexual women                  | Behavioral Risk Factor Surveillance System (BRFSS) for 10 States 2010.     | CVD symptoms, asthma, diabetes  | Population survey. Supported by National Research Service awards. |

| First author (year)                                                                     | Survey method, Exposure                                                                                                                  | Population, setting, country                                                             | Sexual orientation n/behaviour question                                                                        | Comparison         | Recruitment, data collection                                             | Outcomes of interest*                                   | Study design, funding                                                                                         |
|-----------------------------------------------------------------------------------------|------------------------------------------------------------------------------------------------------------------------------------------|------------------------------------------------------------------------------------------|----------------------------------------------------------------------------------------------------------------|--------------------|--------------------------------------------------------------------------|---------------------------------------------------------|---------------------------------------------------------------------------------------------------------------|
|                                                                                         |                                                                                                                                          | Dakota, Washington, Wisconsin, USA                                                       |                                                                                                                |                    |                                                                          |                                                         |                                                                                                               |
| <b>Surveys based on single state Behavioral Risk Factor Surveillance System (BRFSS)</b> |                                                                                                                                          |                                                                                          |                                                                                                                |                    |                                                                          |                                                         |                                                                                                               |
| Conron (2010)                                                                           | Telephone-based (landline) random digit dialled interview. Had ever been told by a health professional that they had (a named condition) | English, Spanish or Portuguese speaking non-institutionalized adults. Massachusetts, USA | A heterosexual or straight, B homosexual, gay or lesbian, C bisexual or D something else? (D answers excluded) | Heterosexual women | Massachusetts Behavioral Risk Factor Surveillance System (BRFSS) 2001-8. | Heart disease, diabetes, asthma                         | Population survey. Supported by Massachusetts Department of Public Health HIV/AIDS Bureau and Ford Foundation |
| Garland-Forshee (2014)                                                                  | Telephone-based (landline) random digit dialled interview. Had ever been told by a health professional that they had (a named condition) | English or Spanish speaking non-institutionalized adults, Oregon, USA                    | A heterosexual or straight, B homosexual, gay or lesbian, C bisexual or D other? (D answers excluded)          | Heterosexual women | Oregon Behavioral Risk Factor Surveillance System 2005-8                 | Cardiovascular disease, hypertension, diabetes, asthma  | Population survey. Supported by Center for Disease Control grants.                                            |
| Matthews (2014)                                                                         | Telephone-based (landline) random digit dialled interview. Had ever been told by a health professional that they had (a named condition) | English or Spanish speaking non-institutionalized adults. North Carolina, USA            | A heterosexual or straight, B homosexual, gay or lesbian, C bisexual or D other? (D answers excluded)          | Heterosexual women | North Carolina Behavioral Risk Factor Surveillance System 2011           | Angina or heart disease, hypertension, diabetes, asthma | Population survey. Supported by National Institute for Mental Health grant.                                   |
| Dilley (2010)                                                                           | Telephone-based (landline) random digit dialled                                                                                          | English or Spanish speaking non-institutionalized                                        | A heterosexual or straight, B homosexual                                                                       | Heterosexual women | Washington State Behavioral Risk Factor Surveillance                     | Diabetes, hypertension, (asthma),                       | Population survey. Supported by Washington                                                                    |



| First author (year)       | Survey method, Exposure                                                                                                                  | Population, setting, country                                                           | Sexual orientation/behaviour question                                                                          | Comparison                      | Recruitment, data collection                                                 | Outcomes of interest*                                    | Study design, funding                                                      |
|---------------------------|------------------------------------------------------------------------------------------------------------------------------------------|----------------------------------------------------------------------------------------|----------------------------------------------------------------------------------------------------------------|---------------------------------|------------------------------------------------------------------------------|----------------------------------------------------------|----------------------------------------------------------------------------|
| and                       | interview. Had ever been told by a health professional that they had (a named condition)                                                 | sed adults. Washington, USA                                                            | al, gay or lesbian, C bisexual or D something else? (D answers excluded)                                       |                                 | e System (BRFSS) 2003-6.                                                     |                                                          | State Tobacco Prevention and Control Program and BRFSS                     |
| Fredriksen-Goldsen (2012) | Telephone-based (landline) random digit dialled interview. Had ever been told by a health professional that they had (a named condition) | English or Spanish speaking non-institutionalized adults. Washington, USA              | A heterosexual or straight, B homosexual, gay or lesbian, C bisexual or D something else? (D answers excluded) | Heterosexual women              | Washington State Behavioral Risk Factor Surveillance System (BRFSS) 2003-9.  | Asthma                                                   | Population survey. Supported by NIH and National Institute on Aging grants |
| and                       | Telephone-based (landline) random digit dialled interview. Had ever been told by a health professional that they had (a named condition) | English or Spanish speaking non-institutionalized adults aged over 50. Washington, USA | A heterosexual or straight, B homosexual, gay or lesbian, C bisexual or D something else? (D answers excluded) | Heterosexual women aged over 50 | Washington State Behavioral Risk Factor Surveillance System (BRFSS) 2003-10. | Cardiovascular disease (asthma, diabetes, hypertension), | Population survey. Supported by National Institute on Aging grant          |

#### Studies based on other US national or state surveys

|                |                                                                                                                                   |                                   |                                                                                                            |                |                                          |                                                                                                                                    |                                                                                  |
|----------------|-----------------------------------------------------------------------------------------------------------------------------------|-----------------------------------|------------------------------------------------------------------------------------------------------------|----------------|------------------------------------------|------------------------------------------------------------------------------------------------------------------------------------|----------------------------------------------------------------------------------|
| Jackson (2016) | In-person interviews using cluster-based probability sampling. Had ever been told by a health professional that they had (a named | Non-institutionalized adults. USA | Straight (not lesbian or gay); gay or lesbian; bisexual; something else? (something else answers excluded) | Straight women | National Health Interview Survey 2013-14 | Diabetes, heart disease (CHD or any other kind of heart disease, angina pectoris or a myocardial infarction), stroke, hypertension | Population survey Supported by several grants including Harvard Catalyst and NIH |
| and            | Ward (2015)                                                                                                                       |                                   |                                                                                                            |                |                                          | Asthma                                                                                                                             |                                                                                  |

| First author (year) | Survey method, Exposure                                                                                                           | Population, setting, country                                     | Sexual orientation/behaviour question                                                                                                                                                                                                                           | Comparison                                                  | Recruitment, data collection                    | Outcomes of interest*                                                  | Study design, funding                                                    |
|---------------------|-----------------------------------------------------------------------------------------------------------------------------------|------------------------------------------------------------------|-----------------------------------------------------------------------------------------------------------------------------------------------------------------------------------------------------------------------------------------------------------------|-------------------------------------------------------------|-------------------------------------------------|------------------------------------------------------------------------|--------------------------------------------------------------------------|
|                     | condition), or diagnosed by a doctor (CVD)                                                                                        |                                                                  |                                                                                                                                                                                                                                                                 |                                                             |                                                 | (Ward)                                                                 |                                                                          |
| Kann (2016)         | School questionnaire - based survey, nationally representative data. Had ever been told by a doctor or nurse that they had asthma | Students in grades 9–12 (aged 14–18) attending high schools, USA | Which of the following best describes you? “heterosexual (straight),” “gay or lesbian,” “bisexual,” or “not sure.” AND During your life, with whom have you had sexual contact? “I have never had sexual contact,” “females,” “males,” and “females and males.” | Heterosexual female students AND Sexual contact with males. | Youth Risk Behavior Surveillance System (YRBSS) | Lifetime asthma                                                        | Population survey Supported by Center for Disease Control and Prevention |
| Boehmer (2014) and  | Telephone-based random digit dialled interview. Had ever been told by a health professional that they had (a named condition)     | Adults aged over 20 with telephone and living in California      | Identified as heterosexual; gay or lesbian; bisexual (excluded celibate and non-sexual responses)                                                                                                                                                               | Heterosexual women                                          | California Health Interview Survey 2001-7       | Heart disease, hypertension, hypertensive medication, diabetes, asthma | Population survey. Supported by – NR                                     |
| Wallace             | Telephone-based                                                                                                                   | Lesbian and bisexual                                             | NR                                                                                                                                                                                                                                                              | Heterosexual                                                | California Health                               | (Heart disease,                                                        | Population survey.                                                       |

| First author (year)                                    | Survey method, Exposure                                                                                                                                                         | Population, setting, country                                                                 | Sexual orientation/behaviour question                                                                                                                                                                               | Comparison              | Recruitment, data collection                                       | Outcomes of interest*                                                                                         | Study design, funding                                                                                                                                                                          |
|--------------------------------------------------------|---------------------------------------------------------------------------------------------------------------------------------------------------------------------------------|----------------------------------------------------------------------------------------------|---------------------------------------------------------------------------------------------------------------------------------------------------------------------------------------------------------------------|-------------------------|--------------------------------------------------------------------|---------------------------------------------------------------------------------------------------------------|------------------------------------------------------------------------------------------------------------------------------------------------------------------------------------------------|
| (2011)                                                 | survey. Question NR                                                                                                                                                             | women aged 50-70                                                                             |                                                                                                                                                                                                                     | women aged 50-70        | Interview Surveys 2003-7                                           | hypertension, diabetes,)                                                                                      | Supported by California Wellness Foundation                                                                                                                                                    |
| Farmer (2013)                                          | In-home survey. Had ever been told by a health professional that they had diabetes or sugar diabetes, responded yes to currently taking anti-hypertensives                      | Adults aged 20-69 who completed the sexual behaviour survey. National, USA                   | Do you think of yourself as heterosexual or straight (attracted only to men); homosexual or lesbian (sexually attracted only to women); bisexual (sexually attracted to men and women); something else or not sure. | Heterosexual women      | National Health and Nutrition Examination Survey (NHANES) 2001-8   | Diabetes, anti-hypertensive medication                                                                        | National population survey Supported by National Institute for Drug Abuse and National Institute on Alcohol Use and Alcoholism grants.                                                         |
| <b>Studies based on single waves of cohort studies</b> |                                                                                                                                                                                 |                                                                                              |                                                                                                                                                                                                                     |                         |                                                                    |                                                                                                               |                                                                                                                                                                                                |
| Everett (2013) and Clark (2015)                        | Interviewer collected Hypertension results (Everett) and diabetes from fasting blood glucose sample, non-fasting glucose sample, HbA1c or self-report health provider diagnosis | Follow up 10-15 years after, from sample recruited originally through schools. National, USA | 100% heterosexual (straight); mostly heterosexual (straight) but somewhat attracted to people of your own sex; bisexual – attracted to males and females equally; mostly homosexual                                 | 100% heterosexual women | Wave IV of National Longitudinal Study of Adolescent Health 2007-8 | Everett 2013 - Hypertension of >140 SBP and >90 DBP. Clarke 2015 - Diabetes (and antihypertensive medication) | National population cohort Supported by Eunice Shriver National Institute of Child Health and Human Development grant. (Everett 2013) and National Center for Advancing translational sciences |

| First author (year) | Survey method, Exposure                                                                                         | Population, setting, country                                         | Sexual orientation/behaviour question                                                 | Comparison                     | Recruitment, data collection                                                                          | Outcomes of interest* | Study design, funding                                            |
|---------------------|-----------------------------------------------------------------------------------------------------------------|----------------------------------------------------------------------|---------------------------------------------------------------------------------------|--------------------------------|-------------------------------------------------------------------------------------------------------|-----------------------|------------------------------------------------------------------|
|                     | or use of anti-diabetic medication in previous 4 weeks (Clarke 2015)                                            |                                                                      | al (gay) but somewhat attracted to people of the opposite sex; 100% homosexual (gay). |                                |                                                                                                       |                       | grant. (Clarke 2015)                                             |
| McNair (2011)       | Self-completion questionnaire. Had been diagnosed or treated for a range of illnesses over the previous 3 years | Original sample aged 18-23 selected randomly from Medicare Australia | Exclusively heterosexual, mainly heterosexual, bisexual, mainly homosexual (lesbian)  | Exclusively heterosexual women | Third survey of the young cohort of women in the Australian Longitudinal Study on Women's Health 2003 | Asthma,               | National population cohort Supported by Lesbian Health Fund, USA |

\* outcomes in brackets were reported in included study texts but not used in the systematic review due to elimination of duplicate reporting.

**Table 2. Prevalence of asthma by sexual orientation**

| Study name                         | Heterosexual             | Lesbian                  | AOR<br>(95%CI)       | Bisexual                 | AOR<br>(95%CI)       | SMW                      | AOR<br>(95%CI)          |
|------------------------------------|--------------------------|--------------------------|----------------------|--------------------------|----------------------|--------------------------|-------------------------|
| Blosnich 2014&                     | 15.3%#<br>(SE 0.003)     | 22.2%#<br>(SE 0.03)      | 1.50 (1.04 to 2.16)* | 26.4%#<br>(SE 0.04)      | 1.68 (1.07 to 2.63)* |                          |                         |
| Blosnich 2013 (lifetime diagnosis) | 14.6%#<br>(NR)           |                          |                      |                          |                      | 26.1%#<br>(NR)           | 1.72<br>(1.11 to 2.65)* |
| Blosnich 2013 (current diagnosis)  | 9.5%<br>(NR)             |                          |                      |                          |                      | 21.4%<br>(NR)            | 2.09<br>(1.30 to 3.36)* |
| Boehmer 2014£                      | 13.7%<br>(SE 0.16)       | 20.8%<br>(SE 1.70)       | 1.41 (1.14 to 1.73)* | 21.5%<br>(SE 1.76)       | 1.52 (1.24 to 1.87)* | NR                       | NR                      |
| Conron 2010&                       | 17.4%#<br>(SE 0.3)       | 24.9%#<br>(SE 2.3)       | 1.68 (1.32 to 2.14)  | 25.7%#<br>(SE 3.1)       | 1.58 (1.15 to 2.18)  | NR                       | NR                      |
| Fredriksen-Goldsen 2012&           | 16.5%#                   | 19.9%#                   | 1.23 (NR)            | 31.9%#                   | 2.17 (NR)*           | NR                       | NR                      |
| Garland-Forshee 2014&              | 12.1%#<br>(11.5 to 12.7) | 15.4%#<br>(10.8 to 21.7) | 1.2 (0.8 to 1.9)     | 25.6%#<br>(18.6 to 34.2) | 2.4 (1.5 to 3.6)*    | NR                       | NR                      |
| Kann 2016 by sexual identity       | 23.0%#<br>(21.1 to 24.9) | NR                       | NR                   | NR                       | NR                   | 28.3%#<br>(24.4 to 32.6) | NR                      |
| Kann 2016 by sexual behaviour      | 25.8%#<br>(23.5 to 28.2) | NR                       | NR                   | NR                       | NR                   | 31.4%#<br>(26.9 to 36.4) | NR                      |
| Matthews 2014                      | 15.7%#                   | NR                       | NR                   | NR                       | NR                   | 27.7%#                   | 1.94<br>(0.96 to 3.92)  |
| McNair 2011£                       | 9.4%                     | 10.4%                    | NR                   | 18.0%*                   | NR                   | NR                       | NR                      |
| Ward 2015 (current diagnosis)      | 8.5% (7.9 to 9.0)        | 9.5% (6.2 to 14.4)       | 1.11 (0.70 to 1.76)  | 12.4% (7.3 to 20.4)      | 1.53 (0.87 to 2.70)  | NR                       | NR                      |

\* - statistically significant to  $p < 0.05$  or less, # - weighted percentages, & - calculated from weighted percentages, £ - calculated from unweighted percentages, RR – relative risk.

1  
2  
3  
4  
5  
6  
7  
8  
9  
10  
11  
12  
13  
14  
15  
16  
17  
18  
19  
20  
21  
22  
23  
24  
25  
26  
27  
28  
29  
30  
31  
32  
33  
34  
35  
36  
37  
38  
39  
40  
41  
42  
43  
44  
45  
46  
47  
48  
49  
50  
51  
52  
53  
54  
55  
56  
57  
58  
59  
60

For peer review only

1  
2  
3  
4  
5  
6  
7  
8  
9  
10  
11  
12  
13  
14  
15  
16  
17  
18  
19  
20  
21  
22  
23  
24  
25  
26  
27  
28  
29  
30  
31  
32  
33  
34  
35  
36  
37  
38  
39  
40  
41  
42  
43  
44  
45  
46  
47  
48  
49  
50  
51  
52  
53  
54  
55  
56  
57  
58  
59  
60

Figure 1. Meta-analysis of asthma in lesbians and in bisexual women

For peer review only

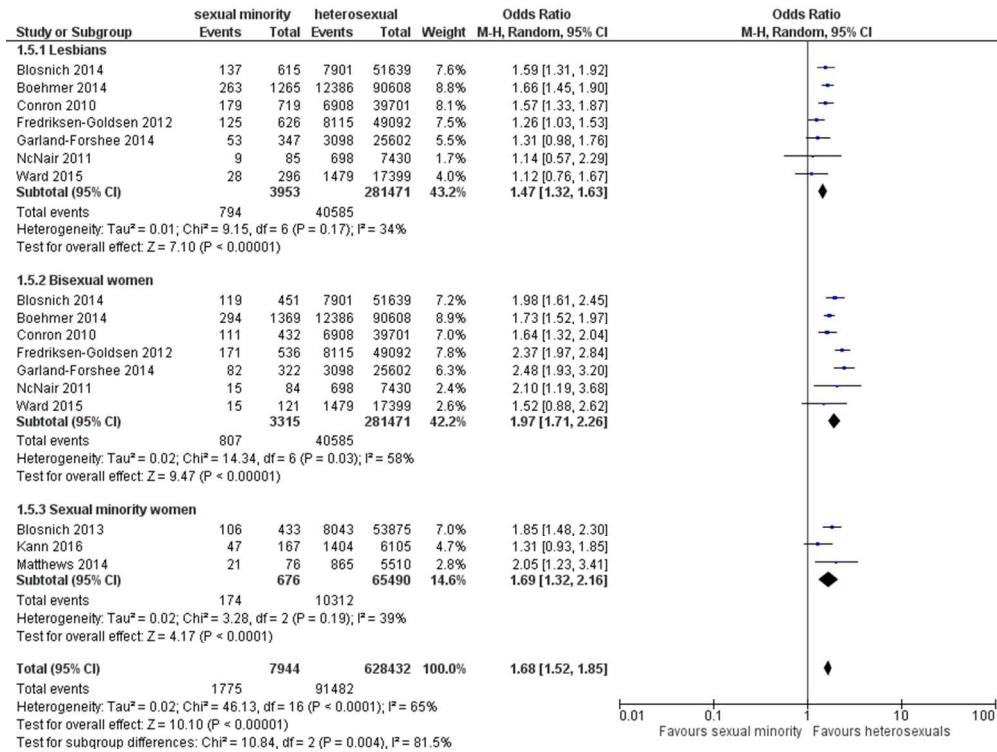

Subgroup meta-analysis of asthma in lesbians, bisexual women and SMW



1  
2  
3 Title: A systematic review and meta-analysis of diabetes mellitus, cardiovascular and respiratory  
4 condition epidemiology in sexual minority women.  
5

6  
7 Authors: Catherine Meads<sup>1</sup>, Adam Martin<sup>2</sup>, Jeffrey Grierson<sup>1</sup>, Justin Varney<sup>3</sup>  
8  
9

## 10 WEB APPENDIX

11  
12  
13

14 Web supplement 1. Search strategy for Medline, Embase, PsycInfo and CAB Abstracts. Dec 2016,  
15 Medline April 2015  
16

17 Web Table 1. Participant baseline characteristics

18 Web Table 2. Critical Appraisal Skills Programme (CASP) quality assessment results

19 Web Table 3. Prevalence of cardiovascular disease or CVD symptoms by sexual orientation

20 Web Table 4. Prevalence of hypertension or hypertensive medication use by sexual orientation

21 Web Table 5. Prevalence of any type of diabetes mellitus by sexual orientation  
22  
23  
24  
25  
26

27 Web Figure 1. PRISMA flow diagram

28 Web Figure 2a. CVD in lesbians

29 Web Figure 2b, CVD in bisexual women

30 Web Figure 3a. Hypertension in lesbians

31 Web Figure 3b. Hypertension in bisexual women

32 Web Figure 4a. Diabetes mellitus in lesbians

33 Web Figure 4b. Diabetes mellitus in bisexual women  
34  
35  
36  
37  
38  
39  
40  
41  
42  
43  
44  
45  
46  
47  
48  
49  
50  
51  
52  
53  
54  
55  
56  
57  
58  
59  
60

1  
2  
3 Web Supplement 1. – Search strategy for Medline, Embase, PsycInfo and CAB Abstracts. December  
4 2016  
5

6  
7 Database: Ovid MEDLINE(R) 1948 to Present (including In-Process & Other Non-Indexed Citations)  
8

9 Search Strategy:  
10

11 -----  
12  
13 1 lesbian.mp. or Homosexuality, Female/ (5704)  
14 2 Bisexuality/ or bisexual women.mp. (4142)  
15 3 wsw.mp. (120)  
16 4 WSMW.mp. (5)  
17 5 sexual orientation.mp. or Sexual Behavior/ (56050)  
18 6 sexual identity.mp. (1251)  
19 7 queer.mp. or Homosexuality/ (13250)  
20 8 1 or 2 or 3 or 4 or 5 or 6 or 7 (70952)  
21 9 limit 8 to yr="2015 -Current" (4625)  
22 10 limit 9 to female (3011)  
23 11 Great Britain/ or UK.mp. (276229)  
24 12 10 and 11 (62)  
25

26  
27 SEARCH QUERY - EMBASE  
28

29 -----  
30  
31 (((('homosexual female':ab,ti or 'bisexual female':ab,ti or 'women who have sex with women':ab,ti  
32 and [2015-2016]/py) or ('homosexual female'/exp or 'homosexual female') or 'bisexual female' or  
33 'women who have sex with women' or wsw or wsmw) and (2015:py or 2016:py or 2017:py)) and  
34 'united kingdom'  
35  
36  
37  
38

39 Database: PsycINFO <1967 to November Week 1 2016>  
40

41 Search Strategy:  
42

43 -----  
44  
45 1 exp Lesbianism/ or exp Sexual Orientation/ or exp Homosexuality/ or exp Bisexuality/ or  
46 lesbian\$.mp. (30632)  
47 2 bisexual women.mp. (613)  
48 3 wsw.mp. (46)  
49 4 wsmw.mp. (2)  
50 5 sexual identity.mp. (3150)  
51 6 queer.mp. (3030)  
52 7 1 or 2 or 3 or 4 or 5 or 6 (32610)  
53 8 limit 7 to (human and yr="2015 -Current") (3331)  
54 9 limit 8 to female (1815)  
55 10 Great britain.mp. (2848)  
56 11 united kingdom.mp. (8990)  
57

1  
2  
3 12 uk.mp. (30316)  
4 13 british.mp. (20760)  
5 14 gb.mp. (241)  
6 15 english.mp. (118463)  
7 16 scottish.mp. (2638)  
8 17 welsh.mp. (1111)  
9 18 irish.mp. (3268)  
10 19 10 or 11 or 12 or 13 or 14 or 15 or 16 or 17 or 18 (177759)  
11 20 9 and 19 (57)  
12  
13  
14  
15

16 Database: CAB Abstracts <1973 to 2016 Week 44>

17 Search Strategy:  
18  
19  
20

21 1 exp Lesbianism/ or exp Sexual Orientation/ or exp Homosexuality/ or exp Bisexuality/ or  
22 lesbian\$.mp. (2168)  
23 2 bisexual women.mp. (25)  
24 3 wsw.mp. (100)  
25 4 wsmw.mp. (1)  
26 5 sexual identity.mp. (113)  
27 6 queer.mp. (104)  
28 7 1 or 2 or 3 or 4 or 5 or 6 (2365)  
29 8 limit 7 to (human and yr="2015 -Current") [Limit not valid in CAB Abstracts; records were  
30 retained] (412)  
31 9 limit 8 to female [Limit not valid in CAB Abstracts; records were retained] (412)  
32 10 Great britain.mp. (34833)  
33 11 united kingdom.mp. (152174)  
34 12 uk.mp. (170127)  
35 13 british.mp. (188436)  
36 14 gb.mp. (8148)  
37 15 english.mp. (41160)  
38 16 scottish.mp. (5784)  
39 17 welsh.mp. (3198)  
40 18 irish.mp. (15558)  
41 19 10 or 11 or 12 or 13 or 14 or 15 or 16 or 17 or 18 (252567)  
42 20 9 and 19 (10)  
43  
44  
45  
46  
47  
48  
49  
50  
51  
52  
53  
54  
55  
56  
57  
58  
59  
60

1  
2  
3 Database: OVID Medline April 2015

4 1 Exp Homosexuality, Female/  
5 2 wsw.tw  
6 3 lesbian\*.tw  
7 4 gay.tw  
8 5 LGBT\*.tw  
9 6 homosexual\*.tw  
10 7 Exp Bisexuality/  
11 8 bisexual\*.tw  
12 9 pan?sexual\*.tw  
13 10 queer\*.tw  
14 11 "sexual orientation".tw  
15 12 "sexual preference\*"  
16 13 "sexual minorit\*".tw  
17 14 "same sex".tw  
18 15 1 or 2 or 3 or 4 or 5 or 6 or 7 or 8 or 9 or 10 or 11 or 12 or 13 or 14  
19  
20  
21  
22  
23  
24  
25  
26  
27  
28  
29  
30  
31  
32  
33  
34  
35  
36  
37  
38  
39  
40  
41  
42  
43  
44  
45  
46  
47  
48  
49  
50  
51  
52  
53  
54  
55  
56  
57  
58  
59  
60

Web Table 1. Participant baseline characteristics

|                 | <b>Number of heterosexual women</b> | <b>Age</b>          | <b>Ethnicity</b>                                    | <b>Number of lesbians/bisexual/SMW</b> | <b>Age</b>                                                  | <b>Ethnicity</b>                                                                                                                | <b>Demographic imbalances compared to heterosexual women.</b>                                                                       | <b>Prevalence estimates weighted by:</b>       | <b>Adjusted odds ratios weighted by:</b>                                               |
|-----------------|-------------------------------------|---------------------|-----------------------------------------------------|----------------------------------------|-------------------------------------------------------------|---------------------------------------------------------------------------------------------------------------------------------|-------------------------------------------------------------------------------------------------------------------------------------|------------------------------------------------|----------------------------------------------------------------------------------------|
| Blosnich (2014) | 51,639                              | Mean 47.3 (SE 0.16) | 61.4% white, 3.6% black, 26.3% Hispanic             | 615 lesbians, 451 bisexual women       | Mean 43.1 (SE 1.33) lesbians, 35.1 (SE 1.41) bisexual women | 70.8% white, 4.3% black, 15.9% Hispanic lesbians, 61.1% white, 5.5% black, 24.0% Hispanic bisexual women                        | SMW younger, fewer partnered, lesbians more educated, more employed, bisexual women less educated, fewer employed, less income.     | Age race/ethnicity, education, income          | Age race/ethnicity, education, income (only conducted where bivariate analyses p<0.05) |
| Blosnich (2013) | 53,875 opposite sex partnered       | Mean 33.0 (SE 0.06) | 67.5% white                                         | 433 same-sex partnered                 | Mean 32.7 (SE 0.69)                                         | 72.6% white                                                                                                                     | Same sex partnered lower income,                                                                                                    | Education, race/ethnicity, overweight, smoking | 'weighted to account for sampling design'                                              |
| Boehmer (2014)  | 90,608                              | Mean 43.0 (SE 0.03) | 50.1% white, 6.5% black, 13.0% Asian 24.6% Hispanic | 1,265 lesbians, 1,369 bisexual women   | Mean 42.4 (SE 0.47) lesbians, 36.3 (SE 0.53) bisexual women | 68.5% white, 7.4% black, 4.9% Asian 11.8% Hispanic lesbians, 57.6% white, 10.0% Asian 7.0% black, 16.9% Hispanic bisexual women | SMW younger, more white, more educated, more US born, lesbians more income, bisexual women less income, fewer with health insurance | Unadjusted prevalence reported                 | Age, race/ethnicity, education, household income, nativity                             |
| Conron (2010)   | 39,701                              | 35.2% aged 18-33    | 83.2% white, 4.1% black, 2.6% Asian, 8.9% Hispanic  | 719 lesbian, 432 bisexual women        | 30.4% lesbians, 65.1% bisexual women aged 18-33             | 87.2% white, 4.5% black, 1.2% Asian, lesbian, 5.7% Hispanic                                                                     | Lesbians more educated                                                                                                              | Age, gender                                    | Age, gender, education, income                                                         |

|                   | Number of heterosexual women | Age                            | Ethnicity                                          | Number of lesbians/bisexual/SMW                                             | Age                                                                                                                                            | Ethnicity                                                                                  | Demographic imbalances compared to heterosexual women.                                          | Prevalence estimates weighted by:           | Adjusted odds ratios weighted by:  |
|-------------------|------------------------------|--------------------------------|----------------------------------------------------|-----------------------------------------------------------------------------|------------------------------------------------------------------------------------------------------------------------------------------------|--------------------------------------------------------------------------------------------|-------------------------------------------------------------------------------------------------|---------------------------------------------|------------------------------------|
|                   |                              |                                |                                                    |                                                                             |                                                                                                                                                | 78.9% white, 4.7% black, 5.7% Asian, 9.3% Hispanic bisexual women                          |                                                                                                 |                                             |                                    |
| Dilley (2010)     | 47,505                       | Mean 46.3                      | 85.6% white, 1.8% black, 3.6% Asian, 7.1% Hispanic | 589 lesbian, 561 bisexual women                                             | Mean 40.0 lesbian, 32.9 bisexual women.                                                                                                        | 85.5% white, 1.6% black, 3.1% Asian, 7.2% Hispanic                                         | More higher education in lesbians, less in bisexual women. Lesbians and bisexuals lower income. | Assumed that unadjusted prevalence reported | Sexual orientation, age, education |
| Everett (2013)    | 6,072                        | Mean 28.7 (whole sample)       | NR                                                 | 138 gay/mostly gay 1345 bisexual/ mostly heterosexual,                      | NR                                                                                                                                             | NR                                                                                         | NR                                                                                              | Possibly unadjusted prevalence reported     | N/A                                |
| and Clarke (2015) | 5713                         | Mean 28.8 (95%CI 28.6 to 29.1) | 67.7% white                                        | 71 homosexual, 60 mostly homosexual, 154 bisexual, 1089 mostly heterosexual | Mean (95%CI) 28.9 (28.3 to 29.5), 28.4 (27.8 to 29.0) mostly homosexual, 28.3 (27.9 to 28.6) bisexual, 28.5 (28.2 to 28.7) mostly heterosexual | White 64.1% homosexual, 73.2% mostly homosexual, 69.4% bisexual, 77.5% mostly heterosexual | NR                                                                                              | See above                                   | N/A                                |

1  
2  
3  
4  
5  
6  
7  
8  
9  
10  
11  
12  
13  
14  
15  
16  
17  
18  
19  
20  
21  
22  
23  
24  
25  
26  
27  
28  
29  
30  
31  
32  
33  
34  
35  
36  
37  
38  
39  
40  
41  
42  
43  
44  
45  
46  
47

|                            | <b>Number of heterosexual women</b> | <b>Age</b>          | <b>Ethnicity</b>                         | <b>Number of lesbians/bisexual/SMW</b> | <b>Age</b>                                                 | <b>Ethnicity</b>                                 | <b>Demographic imbalances compared to heterosexual women.</b>                                                                      | <b>Prevalence estimates weighted by:</b> | <b>Adjusted odds ratios weighted by:</b>                      |
|----------------------------|-------------------------------------|---------------------|------------------------------------------|----------------------------------------|------------------------------------------------------------|--------------------------------------------------|------------------------------------------------------------------------------------------------------------------------------------|------------------------------------------|---------------------------------------------------------------|
| Farmer (2013)              | 5,356                               | 36.2% aged 20-29    | 69.8% white, 12.0% black, 12.9% Hispanic | 437 SMW                                | 49.2% aged 20-29                                           | 73.4% white, 13.2% black, 8.6% Hispanic          | SMW younger                                                                                                                        | Possibly unadjusted prevalence reported  | N/A                                                           |
| Fredrikse n-Goldsen (2012) | 49,092                              | Mean 46.6 (SE 0.12) | 83.7% white                              | 626 lesbians, 536 bisexual women       | Mean 42.9 (SE 0.81) lesbian, 32.7 (SE 0.85) bisexual women | 85.4% white lesbian, 78.2% white bisexual women. | SMW younger, fewer partnered, lesbians less education, bisexual women lower income                                                 | Age                                      | Age, education, income                                        |
| Fredrikse n-Goldsen (2013) | 57,466                              | Mean 63.8 (SD 0.06) | 91.8% white                              | 562 lesbians, 291 bisexual women       | Mean 58.6 (SD 0.37)                                        | 90.3% white                                      | SMW more employed, fewer partnered, fewer less educated                                                                            | Unclear weighting factors                | Age, education, income                                        |
| Frisch (2013)              | 61,993,266                          | Aged 18+            | NR                                       | 655,941 same sex cohabiting            | Aged 18+                                                   | NR                                               | NR                                                                                                                                 | (Mortality estimate - by age)            | N/A                                                           |
| Garland-Forshee (2014)     | 25,602                              | 28.8% aged 18-34    | 86.7% white                              | 347 lesbians, 322 bisexual women       | 26.9% lesbian, 62.3% bisexual women aged 18-34             | 81.6% lesbians, 85.8% bisexual women white       | SMW less likely to be partnered, more education, more urban residence, Lesbians more employed, Bisexual women younger, less income | Unclear weighting factors                | Age, education, relationship status, rural or urban residency |
| Jackson (2016)             | 37,185                              | NR                  | 68.3% white, 12.3%                       | 525 lesbians, 353 bisexual women       | NR                                                         | 71.4% white, 12.7% black,                        | Lesbians more educated, fewer                                                                                                      | Age, ethnicity, educational attainment,  | Age race/ethnicity, education,                                |

1  
2  
3  
4  
5  
6  
7  
8  
9  
10  
11  
12  
13  
14  
15  
16  
17  
18  
19  
20  
21  
22  
23  
24  
25  
26  
27  
28  
29  
30  
31  
32  
33  
34  
35  
36  
37  
38  
39  
40  
41  
42  
43  
44  
45  
46  
47

|                       | <b>Number of heterosexual women</b> | <b>Age</b>       | <b>Ethnicity</b>                        | <b>Number of lesbians/bisexual/SMW</b> | <b>Age</b>       | <b>Ethnicity</b>                                                                 | <b>Demographic imbalances compared to heterosexual women.</b> | <b>Prevalence estimates weighted by:</b>                                        | <b>Adjusted odds ratios weighted by:</b>                                                                          |
|-----------------------|-------------------------------------|------------------|-----------------------------------------|----------------------------------------|------------------|----------------------------------------------------------------------------------|---------------------------------------------------------------|---------------------------------------------------------------------------------|-------------------------------------------------------------------------------------------------------------------|
|                       |                                     |                  | black, 12.9% Hispanic                   |                                        |                  | 12.5% Hispanic lesbian<br>73.5% white, 16.0% black, 7.2% Hispanic bisexual women | partnered, bisexual women less income                         | annual household income, occupational class, health status, region of residence | income, occupational class, health status, region of residence                                                    |
| Ward (2015)           | 17,399                              | NR               | NR                                      | 296 lesbians, 121 bisexual women       | NR               | NR                                                                               | NR                                                            | As Jackson 2016 above                                                           | Age, race/ethnicity, education, income, marriage status, employment, health insurance status, region of residence |
| Kann (2016) identity  | 6,105                               | NR               | NR                                      | 167 lesbian, 734 bisexual women        | NR               | NR                                                                               | NR                                                            | Sex, race/ethnicity and grade                                                   | N/A                                                                                                               |
| Kann (2016) behaviour | 3,054                               | NR               | NR                                      | 173 lesbians, 572 bisexual women       | NR               | NR                                                                               | NR                                                            | Sex, race/ethnicity and grade                                                   | N/A                                                                                                               |
| Matthews (2014)       | 6,110                               | 25.7% aged 18-34 | 71.3% white, 20.7% black, 5.2% Hispanic | 86 SMW                                 | 40.6% aged 18-34 | 77.7% white, 14.1% black, 1.7% Hispanic                                          | SMW younger, more likely to use mobile phones                 | Survey design                                                                   | Age                                                                                                               |
| McNair (2011)         | 8,083                               | 25-30            | NR                                      | 99 lesbians, 100 bisexual women        | 25-30            | NR                                                                               | SMW lower income, less likely to be partnered, fewer with     | Unclear weighting factors                                                       | N/A                                                                                                               |



1  
2  
3  
4  
5  
6  
7  
8  
9  
10  
11  
12  
13  
14  
15  
16  
17  
18  
19  
20  
21  
22  
23  
24  
25  
26  
27  
28  
29  
30  
31  
32  
33  
34  
35  
36  
37  
38  
39  
40  
41  
42  
43  
44  
45  
46  
47

| Number of heterosexual women | Age | Ethnicity | Number of lesbians/bisexual/SMW | Age | Ethnicity | Demographic imbalances compared to heterosexual women. | Prevalence estimates weighted by: | Adjusted odds ratios weighted by: |
|------------------------------|-----|-----------|---------------------------------|-----|-----------|--------------------------------------------------------|-----------------------------------|-----------------------------------|
|------------------------------|-----|-----------|---------------------------------|-----|-----------|--------------------------------------------------------|-----------------------------------|-----------------------------------|

children, more urban residence, Lesbians more educated, bisexual women less educated,

For peer review only

**Web Table 2. Critical Appraisal Skills Programme (CASP) quality assessment results**

| Study                     | 1 | 2 | 3  | 4 | 5a | 5b | 6a  | 6b  | 9 | 10 | 11  |
|---------------------------|---|---|----|---|----|----|-----|-----|---|----|-----|
| Blosnich (2014)           | Y | Y | Y  | N | n  | CT | N/A | N/A | Y | Y  | Y   |
| Blosnich (2013)           | Y | Y | CT | N | N  | CT | N/A | N/A | Y | Y  | Y   |
| Boehmer (2014)            | Y | Y | Y  | N | CT | N  | N/A | N/A | Y | Y  | Y   |
| Clarke (2015)             | Y | Y | Y  | Y | N  | CT | N/A | N/A | Y | Y  | Y   |
| Conron (2010)             | Y | Y | Y  | N | N  | CT | N/A | N/A | Y | Y  | Y   |
| Dilley (2010)             | Y | Y | Y  | N | N  | CT | N/A | N/A | Y | Y  | Y   |
| Everett (2013)            | Y | Y | Y  | Y | N  | CT | N/A | N/A | Y | Y  | Y   |
| Farmer (2013)             | Y | Y | Y  | N | N  | CT | N/A | N/A | Y | Y  | Y   |
| Fredriksen-Goldsen (2012) | Y | Y | Y  | N | N  | CT | N/A | N/A | Y | Y  | Y   |
| Fredriksen-Goldsen (2013) | Y | Y | Y  | N | N  | CT | N/A | N/A | Y | Y  | Y   |
| Frisch (2013)             | Y | Y | CT | Y | N  | CT | CT  | Y   | Y | Y  | N/A |
| Garland-Forshee (2014)    | Y | Y | Y  | N | N  | CT | N/A | N/A | Y | Y  | Y   |
| Jackson (2016)            | Y | Y | Y  | N | N  | Y  | N/A | N/A | Y | Y  | Y   |

1  
2  
3  
4  
5  
6  
7  
8  
9  
10  
11  
12  
13  
14  
15  
16  
17  
18  
19  
20  
21  
22  
23  
24  
25  
26  
27  
28  
29  
30  
31  
32  
33  
34  
35  
36  
37  
38  
39  
40  
41  
42  
43  
44  
45  
46  
47

| <b>Study</b>    | <b>1</b> | <b>2</b> | <b>3</b> | <b>4</b> | <b>5a</b> | <b>5b</b> | <b>6a</b> | <b>6b</b> | <b>9</b> | <b>10</b> | <b>11</b> |
|-----------------|----------|----------|----------|----------|-----------|-----------|-----------|-----------|----------|-----------|-----------|
| Kann (2016)     | Y        | Y        | Y        | N        | N         | Y         | N/A       | N/A       | Y        | Y         | Y         |
| Matthews (2014) | Y        | Y        | Y        | N        | CT        | CT        | N/A       | N/A       | Y        | Y         | Y         |
| McNair (2011)   | Y        | Y        | Y        | N        | N         | CT        | N/A       | N/A       | Y        | Y         | Y         |
| Ward (2015)     | Y        | Y        | Y        | N        | N         | CT        | N/A       | N/A       | Y        | Y         | Y         |

The checklist questions were 1. Did the study address a clearly focused issue? 2. Was the cohort recruited in an acceptable way? 3. Was the exposure accurately measured to minimise bias? 4. Was the outcome accurately measured to minimise bias? 5a. Have the authors identified all important confounding factors? 5b) Have they taken account of the confounding factors in the design and/or analysis? 6a. Was the follow up of subjects complete enough? 6b. Was the follow up of subjects long enough? 9. Do you believe the results? 10. Can the results be applied to the local population? 11. Do the results of this study fit with other available evidence?

For peer review only

**Web Table 3. Prevalence of CVD by sexual orientation**

| Study name                      | Heterosexual          | Lesbian               | AOR (95%CI)             | Bisexual              | AOR (95%CI)            | SMW    | AOR (95%CI)             |
|---------------------------------|-----------------------|-----------------------|-------------------------|-----------------------|------------------------|--------|-------------------------|
| Blosnich 2014&                  | 5.8%#<br>(SE 0.002)   | 5.0%#<br>(SE 0.002)   | NR                      | 7.0%#<br>(SE 0.024)   | NR                     | NR     | NR                      |
| Boehmer 2014£                   | 4.9%<br>(SE 0.11)     | 5.8%<br>(SE 1.30)     | 1.46 (0.92 to<br>2.34)  | 3.8%<br>(SE 0.75)     | 1.14 (0.75 to<br>1.72) | NR     | NR                      |
| Conron 2010&                    | 1.3%#<br>(SE 0.1)     | 1.8%#<br>(SE 0.6)     | 1.92 (0.95 to<br>3.87)  | 3.3%#<br>(SE 2.2)     | 2.24 (0.53 to<br>9.43) | NR     | NR                      |
| Fredriksen-Goldsen<br>2013&     | 10.7%#                | NR                    | NR                      | NR                    | NR                     | 10.5%# | 1.37 (1.00 to<br>1.86)* |
| Garland-Forshee<br>2014&        | 6.2%# (5.8 to<br>6.6) | 4.0%#<br>(2.1 to 7.5) | 1.0 (0.5 to 1.9)        | 1.8%#<br>(0.6 to 6.0) | 0.7 (0.2 to 2.9)       | NR     | NR                      |
| Jackson 2016 (heart<br>disease) | 10.8%                 | 9.9%                  | 0.91 (0.61 to 1.35)     | 7.2%                  | 0.73 (0.40 to<br>1.35) | NR     | NR                      |
| Jackson 2016<br>(stroke)        | 3.2%                  | 5.8%                  | 1.96 (1.14 to<br>3.39)* | 3.4%                  | 1.68 (0.71 to<br>3.97) | NR     | NR                      |
| Matthews 2014                   | 4.1%                  | NR                    | NR                      | NR                    | NR                     | 0.4%   | 0.19 (0.04 to<br>0.87)  |

\* - statistically significant to  $p < 0.05$  or less, # - weighted percentages, & - calculated from weighted percentages, £ - calculated from unweighted percentages, RR – relative risk.

1  
2  
3  
4  
5  
6  
7  
8  
9  
10  
11  
12  
13  
14  
15  
16  
17  
18  
19  
20  
21  
22  
23  
24  
25  
26  
27  
28  
29  
30  
31  
32  
33  
34  
35  
36  
37  
38  
39  
40  
41  
42  
43  
44  
45  
46  
47

**Web Table 4. Prevalence of hypertension (or hypertensive medication use) by sexual orientation**

| Study name                       | Heterosexual             | Lesbian                  | AOR (95%CI)         | Bisexual                | AOR (95%CI)         | SMW   | AOR (95%CI)                   |
|----------------------------------|--------------------------|--------------------------|---------------------|-------------------------|---------------------|-------|-------------------------------|
| Boehmer 2014                     | 21.2%<br>(SE 0.19)       | 19.0%<br>(SE 1.81)       | 0.99 (0.77 to 1.26) | 17.6%<br>(SE 1.70)      | 1.21 (0.95 to 1.53) | NR    | NR                            |
| Boehmer 2014<br>(medication use) | 65.3%<br>(SE 0.47)       | 66.0%<br>(SE 4.29)       | 1.57 (0.90 to 2.75) | 45.0%<br>(SE 4.69)      | 0.74 (0.44 to 1.24) | NR    | NR                            |
| Dilley 2010                      | 22.7%<br>(22.1 to 23.4)  | 14.7%<br>(9.8 to 21.4)   | 1.0 (0.6 to 1.7)    | 17.0%<br>(12.2 to 23.1) | 1.6 (1.1 to 2.5)*   | NR    | NR                            |
| Everett 2013&                    | 12.2%#<br>(SE 0.65)      | 10.3%#<br>(SE 3.21)      | NR                  | 11.4%#<br>(SE 1.19)     | NR                  | NR    | NR                            |
| Farmer 2013£<br>(medication use) | 14.7%                    | NR                       | NR                  | NR                      | NR                  | 11.6% | Not statistically significant |
| Garland-Forshee 2014             | 25.6%#<br>(24.3 to 26.8) | 22.9%#<br>(13.8 to 35.7) | 1.2 (0.6 to 2.4)    | 12.4%#<br>(7.5 to 19.9) | 0.9 (0.5 to 1.7)    | NR    | NR                            |
| Jackson 2016                     | 35.5%                    | 32.2%                    | 0.91 (0.74 to 1.12) | 32.1%                   | 0.96 (0.71 to 1.31) | NR    | NR                            |
| Matthews 2014                    | 33.2%                    | NR                       | NR                  | NR                      | NR                  | 22.0% | 1.00 (0.43 to 2.33)           |

\* - statistically significant to p<0.05 or less, # - weighted percentages, & - calculated from weighted percentages, £ - calculated from unweighted percentages, RR – relative risk.

**Web Table 5. Prevalence of any type of diabetes mellitus by sexual orientation**

| Study name           | Heterosexual         | Lesbian                | AOR (95%CI)         | Bisexual             | AOR (95%CI)         | SMW   | AOR (95%CI)                   |
|----------------------|----------------------|------------------------|---------------------|----------------------|---------------------|-------|-------------------------------|
| Blosnich 2014&       | 10.2%#<br>(SE 0.002) | 6.8%#<br>(SE 0.016)    | NR                  | 6.1%#<br>(SE 0.016)  | 0.75 (0.44 to 1.29) | NR    | NR                            |
| Boehmer 2014£        | 5.7%<br>(SE 0.12)    | 4.6%<br>(SE 0.74)      | 1.07 (0.76 to 1.50) | 4.2%                 | 1.10 (0.79 to 1.55) | NR    | NR                            |
| Clark 2015           | 6.0%                 | 1.9%                   | NR                  | 6.8%                 | NR                  | 7.2%  | NR                            |
| Conron 2010          | 3.9%<br>(SE 0.1)     | 3.8%<br>(SE 0.9)       | 1.23 (0.74 to 2.06) | 3.9%<br>(SE 1.1)     | 1.04 (0.62 to 1.76) | NR    | NR                            |
| Dilley 2010          | 6.3%<br>(6.0 to 6.5) | 5.1%<br>(3.3 to 7.7)   | 1.3 (0.8 to 2.0)    | 5.8%<br>(3.8 to 8.8) | 1.8 (1.1 to 2.8)*   | NR    | NR                            |
| Farmer 2013          | 5.3%                 | NR                     | NR                  | NR                   | NR                  | 6.4%  | Not statistically significant |
| Garland-Forshee 2014 | 6.5%<br>(6.1 to 6.8) | 10.8%<br>(4.1 to 26.0) | 2.2 (0.6 to 7.8)    | 2.4%<br>(1.2 to 5.0) | 0.8 (0.4 to 1.6)    | NR    | NR                            |
| Jackson 2016         | 10.7%                | 7.7%                   | 0.88 (0.58 to 1.34) | 7.1%                 | 0.63 (0.33 to 1.20) | NR    | NR                            |
| Matthews 2014        | 11.3%#               | NR                     | NR                  | NR                   | NR                  | 4.3%# | 0.55 (0.17 to 1.82)           |

\* - statistically significant to  $p < 0.05$  or less, # - weighted percentages, & - calculated from weighted percentages, £ - calculated from unweighted percentages, RR – relative risk.

Web Figure 1. PRISMA flow diagram

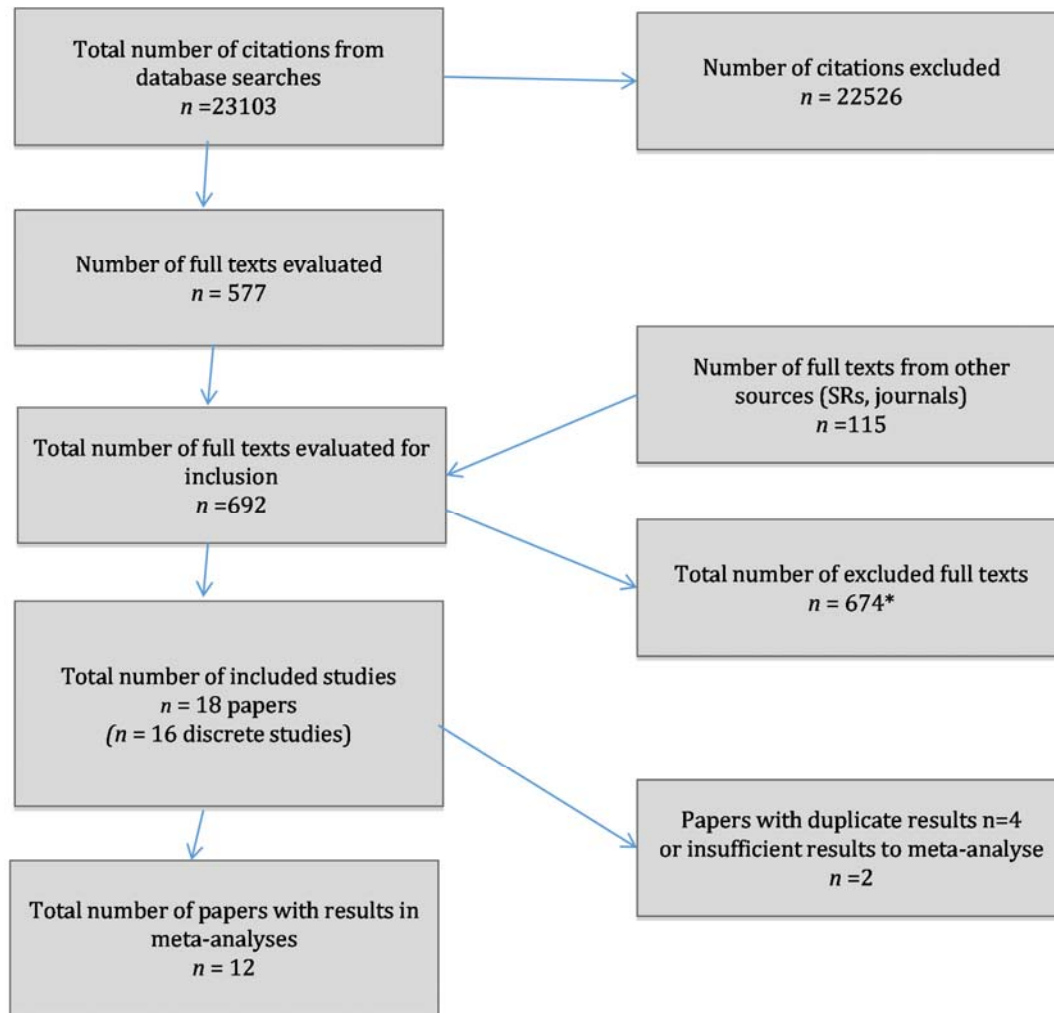

\* Reasons for 674 full text exclusions: case studies = 7, diagnostic studies = 8, experimental studies = 8, in children only = 7, no comparison with heterosexual women = 1, no relevant numerical outcomes = 94, pilot studies = 2, qualitative studies = 123, results in men and women combined only = 124, reviews/editorials = 74, surveys on wrong topic = 226.

Web Figure 2a. CVD in lesbians

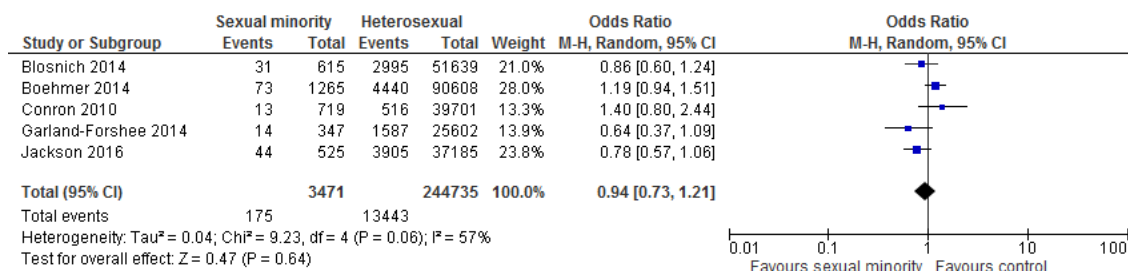

Web Figure 2b, CVD in bisexual women

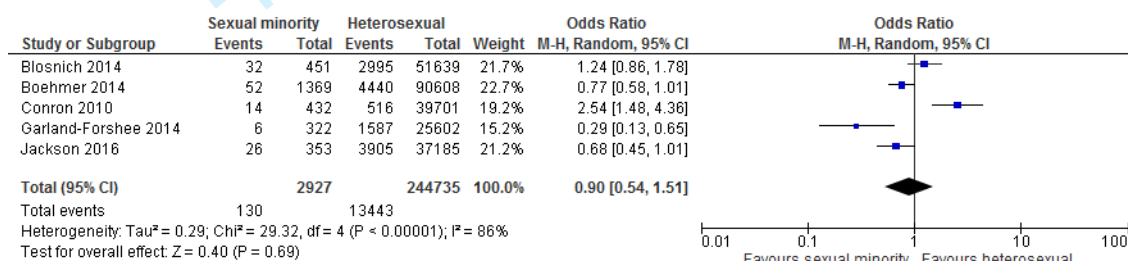

Web Figure 3a. Hypertension in lesbians

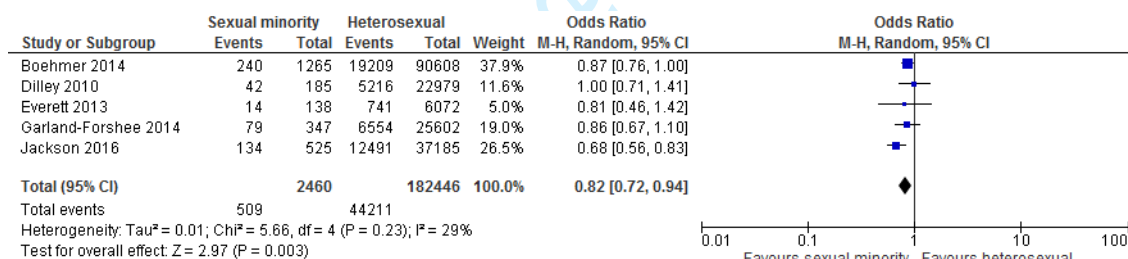

Web Figure 3b. Hypertension in bisexual women

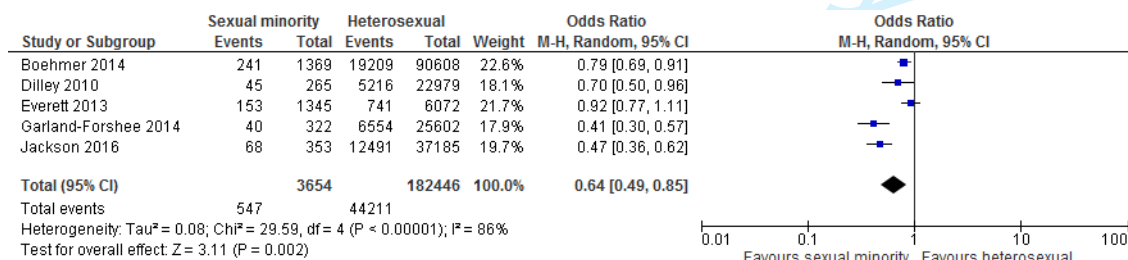



Web Figure 4a. Diabetes mellitus in lesbians

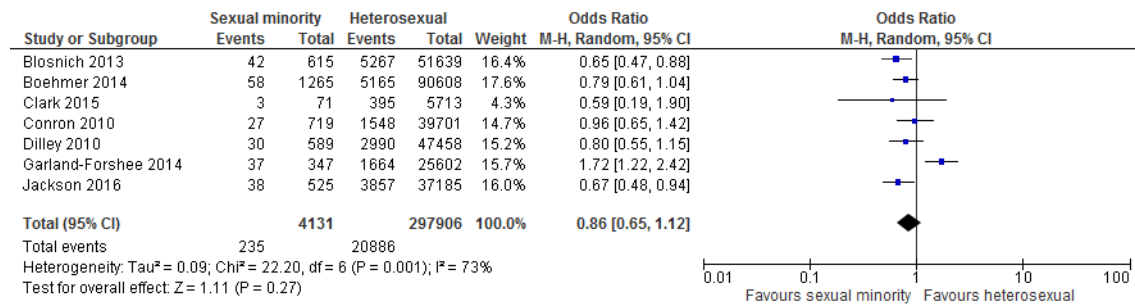

Web Figure 4b. Diabetes mellitus in bisexual women

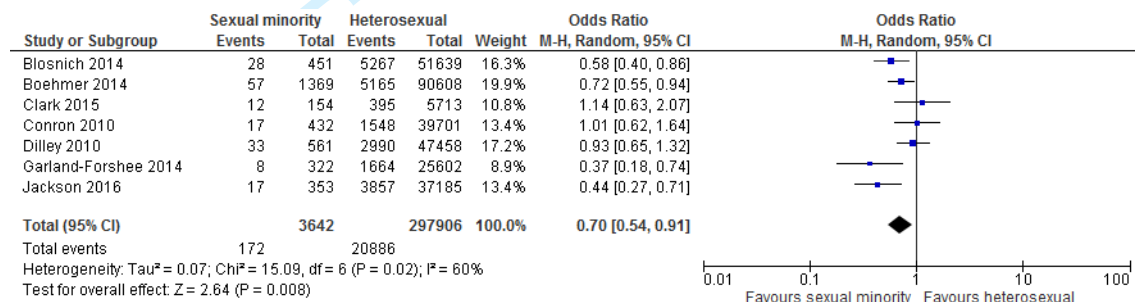

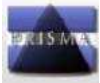

# PRISMA 2009 Checklist

| Section/topic                      | #  | Checklist item                                                                                                                                                                                                                                                                                              | Reported on page # |
|------------------------------------|----|-------------------------------------------------------------------------------------------------------------------------------------------------------------------------------------------------------------------------------------------------------------------------------------------------------------|--------------------|
| <b>TITLE</b>                       |    |                                                                                                                                                                                                                                                                                                             |                    |
| Title                              | 1  | Identify the report as a systematic review, meta-analysis, or both.                                                                                                                                                                                                                                         | 1                  |
| <b>ABSTRACT</b>                    |    |                                                                                                                                                                                                                                                                                                             |                    |
| Structured summary                 | 2  | Provide a structured summary including, as applicable: background; objectives; data sources; study eligibility criteria, participants, and interventions; study appraisal and synthesis methods; results; limitations; conclusions and implications of key findings; systematic review registration number. | 2                  |
| <b>INTRODUCTION</b>                |    |                                                                                                                                                                                                                                                                                                             |                    |
| Rationale                          | 3  | Describe the rationale for the review in the context of what is already known.                                                                                                                                                                                                                              | 4                  |
| Objectives                         | 4  | Provide an explicit statement of questions being addressed with reference to participants, interventions, comparisons, outcomes, and study design (PICOS).                                                                                                                                                  | 4                  |
| <b>METHODS</b>                     |    |                                                                                                                                                                                                                                                                                                             |                    |
| Protocol and registration          | 5  | Indicate if a review protocol exists, if and where it can be accessed (e.g., Web address), and, if available, provide registration information including registration number.                                                                                                                               | 4                  |
| Eligibility criteria               | 6  | Specify study characteristics (e.g., PICOS, length of follow-up) and report characteristics (e.g., years considered, language, publication status) used as criteria for eligibility, giving rationale.                                                                                                      | 4                  |
| Information sources                | 7  | Describe all information sources (e.g., databases with dates of coverage, contact with study authors to identify additional studies) in the search and date last searched.                                                                                                                                  | 4,5                |
| Search                             | 8  | Present full electronic search strategy for at least one database, including any limits used, such that it could be repeated.                                                                                                                                                                               | 4                  |
| Study selection                    | 9  | State the process for selecting studies (i.e., screening, eligibility, included in systematic review, and, if applicable, included in the meta-analysis).                                                                                                                                                   | 5                  |
| Data collection process            | 10 | Describe method of data extraction from reports (e.g., piloted forms, independently, in duplicate) and any processes for obtaining and confirming data from investigators.                                                                                                                                  | 5                  |
| Data items                         | 11 | List and define all variables for which data were sought (e.g., PICOS, funding sources) and any assumptions and simplifications made.                                                                                                                                                                       | 5                  |
| Risk of bias in individual studies | 12 | Describe methods used for assessing risk of bias of individual studies (including specification of whether this was done at the study or outcome level), and how this information is to be used in any data synthesis.                                                                                      | 5                  |
| Summary measures                   | 13 | State the principal summary measures (e.g., risk ratio, difference in means).                                                                                                                                                                                                                               | 5                  |
| Synthesis of results               | 14 | Describe the methods of handling data and combining results of studies, if done, including measures of consistency (e.g., $I^2$ ) for each meta-analysis.                                                                                                                                                   | 5                  |



# PRISMA 2009 Checklist

Page 1 of 2

| Section/topic                 | #  | Checklist item                                                                                                                                                                                           | Reported on page # |
|-------------------------------|----|----------------------------------------------------------------------------------------------------------------------------------------------------------------------------------------------------------|--------------------|
| Risk of bias across studies   | 15 | Specify any assessment of risk of bias that may affect the cumulative evidence (e.g., publication bias, selective reporting within studies).                                                             | 5                  |
| Additional analyses           | 16 | Describe methods of additional analyses (e.g., sensitivity or subgroup analyses, meta-regression), if done, indicating which were pre-specified.                                                         | 5                  |
| <b>RESULTS</b>                |    |                                                                                                                                                                                                          |                    |
| Study selection               | 17 | Give numbers of studies screened, assessed for eligibility, and included in the review, with reasons for exclusions at each stage, ideally with a flow diagram.                                          | 5,32               |
| Study characteristics         | 18 | For each study, present characteristics for which data were extracted (e.g., study size, PICOS, follow-up period) and provide the citations.                                                             | 15-19              |
| Risk of bias within studies   | 19 | Present data on risk of bias of each study and, if available, any outcome level assessment (see item 12).                                                                                                | 27                 |
| Results of individual studies | 20 | For all outcomes considered (benefits or harms), present, for each study: (a) simple summary data for each intervention group (b) effect estimates and confidence intervals, ideally with a forest plot. | 5-7, 20, 29-31     |
| Synthesis of results          | 21 | Present results of each meta-analysis done, including confidence intervals and measures of consistency.                                                                                                  | 21,33,34           |
| Risk of bias across studies   | 22 | Present results of any assessment of risk of bias across studies (see Item 15).                                                                                                                          | See 5              |
| Additional analysis           | 23 | Give results of additional analyses, if done (e.g., sensitivity or subgroup analyses, meta-regression [see Item 16]).                                                                                    | n/a                |
| <b>DISCUSSION</b>             |    |                                                                                                                                                                                                          |                    |
| Summary of evidence           | 24 | Summarize the main findings including the strength of evidence for each main outcome; consider their relevance to key groups (e.g., healthcare providers, users, and policy makers).                     | 7                  |
| Limitations                   | 25 | Discuss limitations at study and outcome level (e.g., risk of bias), and at review-level (e.g., incomplete retrieval of identified research, reporting bias).                                            | 8,9                |
| Conclusions                   | 26 | Provide a general interpretation of the results in the context of other evidence, and implications for future research.                                                                                  | 9,10               |
| <b>FUNDING</b>                |    |                                                                                                                                                                                                          |                    |
| Funding                       | 27 | Describe sources of funding for the systematic review and other support (e.g., supply of data); role of funders for the systematic review.                                                               | 1                  |

From: Moher D, Liberati A, Tetzlaff J, Altman DG, The PRISMA Group (2009). Preferred Reporting Items for Systematic Reviews and Meta-Analyses: The PRISMA Statement. PLoS Med 6(7): e1000097. doi:10.1371/journal.pmed1000097

For more information, visit: [www.prisma-statement.org](http://www.prisma-statement.org).

Page 2 of 2

For peer review only - <http://bmjopen.bmj.com/site/about/guidelines.xhtml>
